# Supplementary material for: tert-Butylhydroperoxide mediated radical cyanoalkylation/cyanoalkenylation of 2-anilino-1,4-naphthoquinones with vinylarenes/arylalkynes and azobis(alkylcarbonitrile)s
Source: Royal Society of Chemistry journal article supplement (doi:10.1039/d3ob01528a), 2023-01-01

***tert*-Butylhydroperoxide mediated radical cyanoalkylation/  
cyanoalkenylation of 2-anilino-1,4-naphthoquinones with  
vinylarenes/arylalkynes and azobis(alkylcarbonitrile)s**

**Supporting Information**

Contents:

- |                                                                                    |                    |
|------------------------------------------------------------------------------------|--------------------|
| 1. General procedure for synthesis- <b>4aaa</b> in gram-scale and <b>12</b>        | <b>S-1</b>         |
| 2. <sup>1</sup> H NMR and <sup>13</sup> C NMR spectra of all synthesized compounds | <b>S-2 to S-47</b> |
| 3. NOESY of the compound <b>6oda</b>                                               | <b>S-48</b>        |
| 4. HRMS data of the control experiments for the adduct <b>7 &amp; 8</b>            | <b>S-49</b>        |

**Procedure for gram-scale synthesis of 4-(1,4-dioxo-3-(phenylamino)-1,4-dihydronaphthalen-2-yl)-2,2-dimethyl-4-phenylbutanenitrile (4aaa):**

To a solution of 2-(phenylamino) naphthalene-1,4-dione (**1a**, 4.01 mmol, 1.0 g), styrene (**2a**, 8.02 mmol, 0.835 g) and AIBN (**3a**, 8.02 mmol, 1.32g) in chloroform (40 mL) was added TBHP (8.02 mmol). The reaction mixture was stirred at 80 °C for 12 hours. After completion of the reaction (as monitored by TLC), water was added to the reaction mixture and extracted with ethyl acetate (3×30 mL). The organic layer was washed with brine (1×20 mL) and dried over anhydrous sodium sulfate. The organic layer was concentrated under reduced pressure and purified by column chromatography on silica gel (ethyl acetate : hexane = 10 : 1) to yield the pure product **4aaa** (1.22g, 72%).

**Procedure for the preparation of 4-(3-hydroxy-1,4-dioxo-1,4-dihydronaphthalen-2-yl)-2,2-dimethyl-4-phenylbutanenitrile (12):**

To a solution of 2-hydroxynaphthalene-1,4-dione (**11**, 0.20 mmol), styrene (**2a**, 0.40 mmol) and AIBN (**3a**, 0.40 mmol) in chloroform (1.5-2 mL) was added TBHP (0.40 mmol). The reaction mixture was stirred at 80 °C for about 12 hours. After completion of the reaction (as monitored by TLC), water was added to the reaction mixture and extracted with ethyl acetate (3×10 mL). The organic layer was washed with brine (1×10 mL) and dried over anhydrous sodium sulfate. The organic layer was concentrated under reduced pressure and purified by column chromatography on silica gel (ethyl acetate : hexane =1 : 4) to yield the pure product **12** (44 mg, 64%).

# <sup>1</sup>H-NMR (400 MHz, Chloroform-*d*)

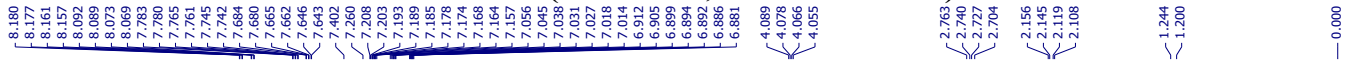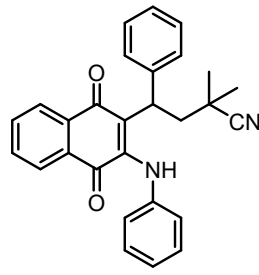

4aaa

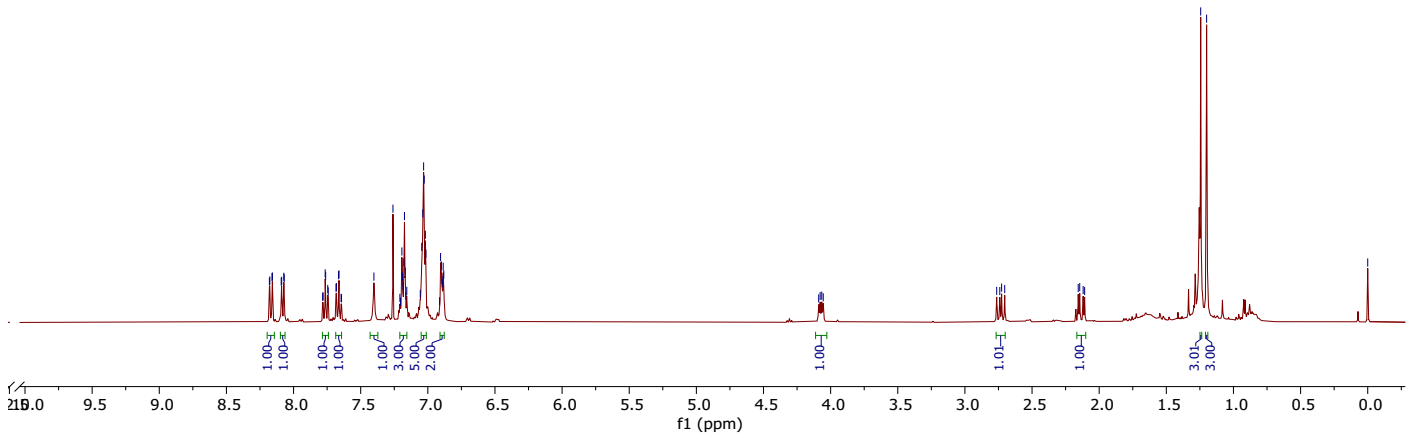

# <sup>13</sup>C-NMR (100 MHz, Chloroform-*d*)

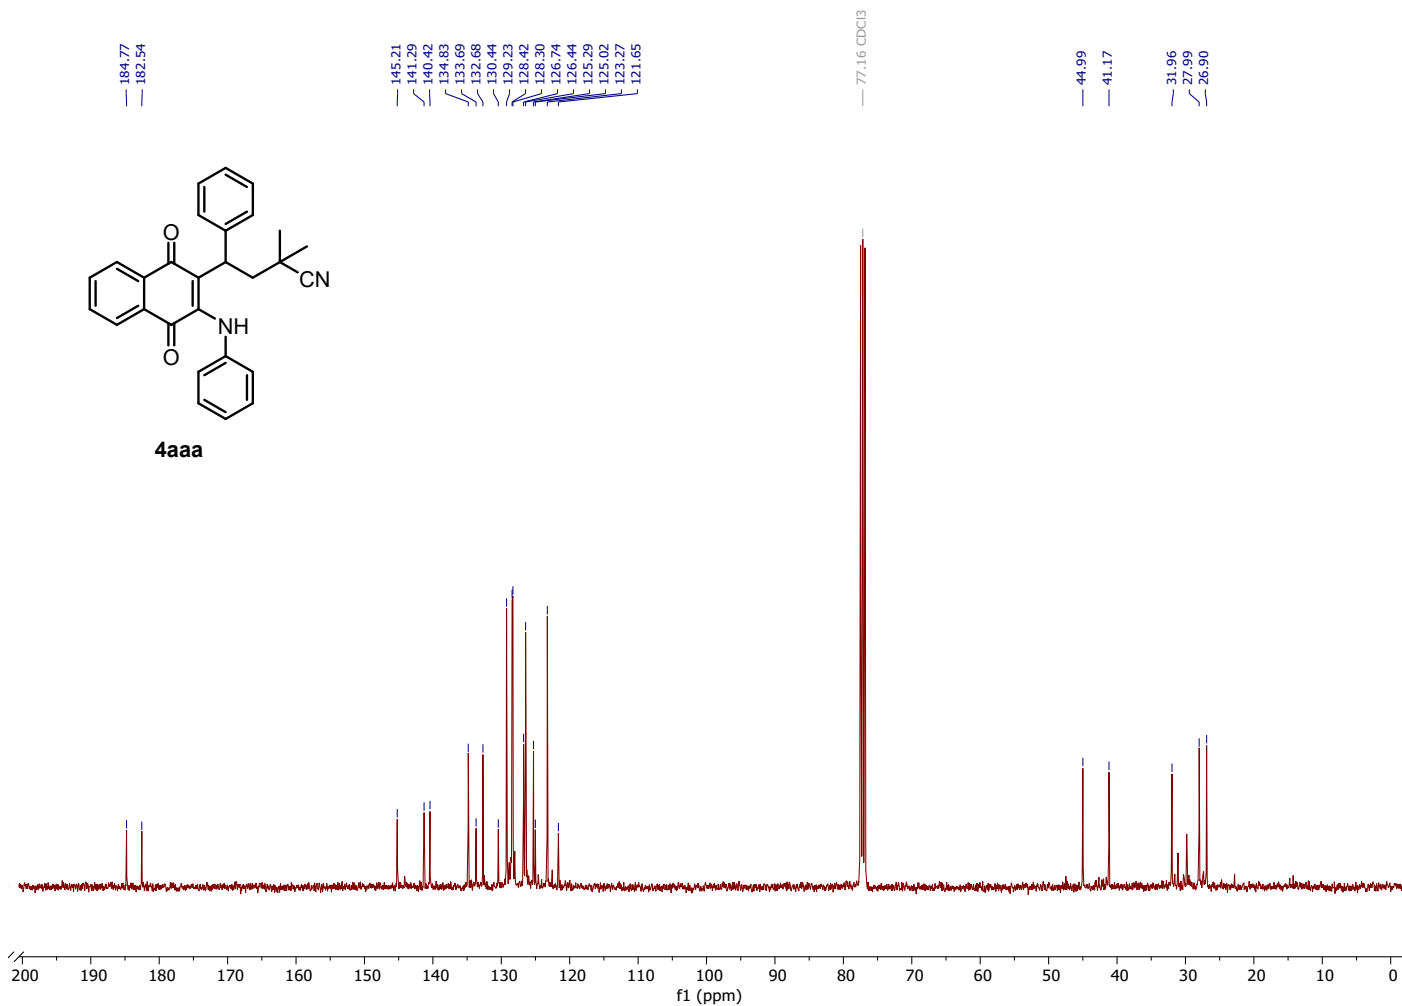

**<sup>1</sup>H-NMR (400 MHz, Chloroform-*d*)**

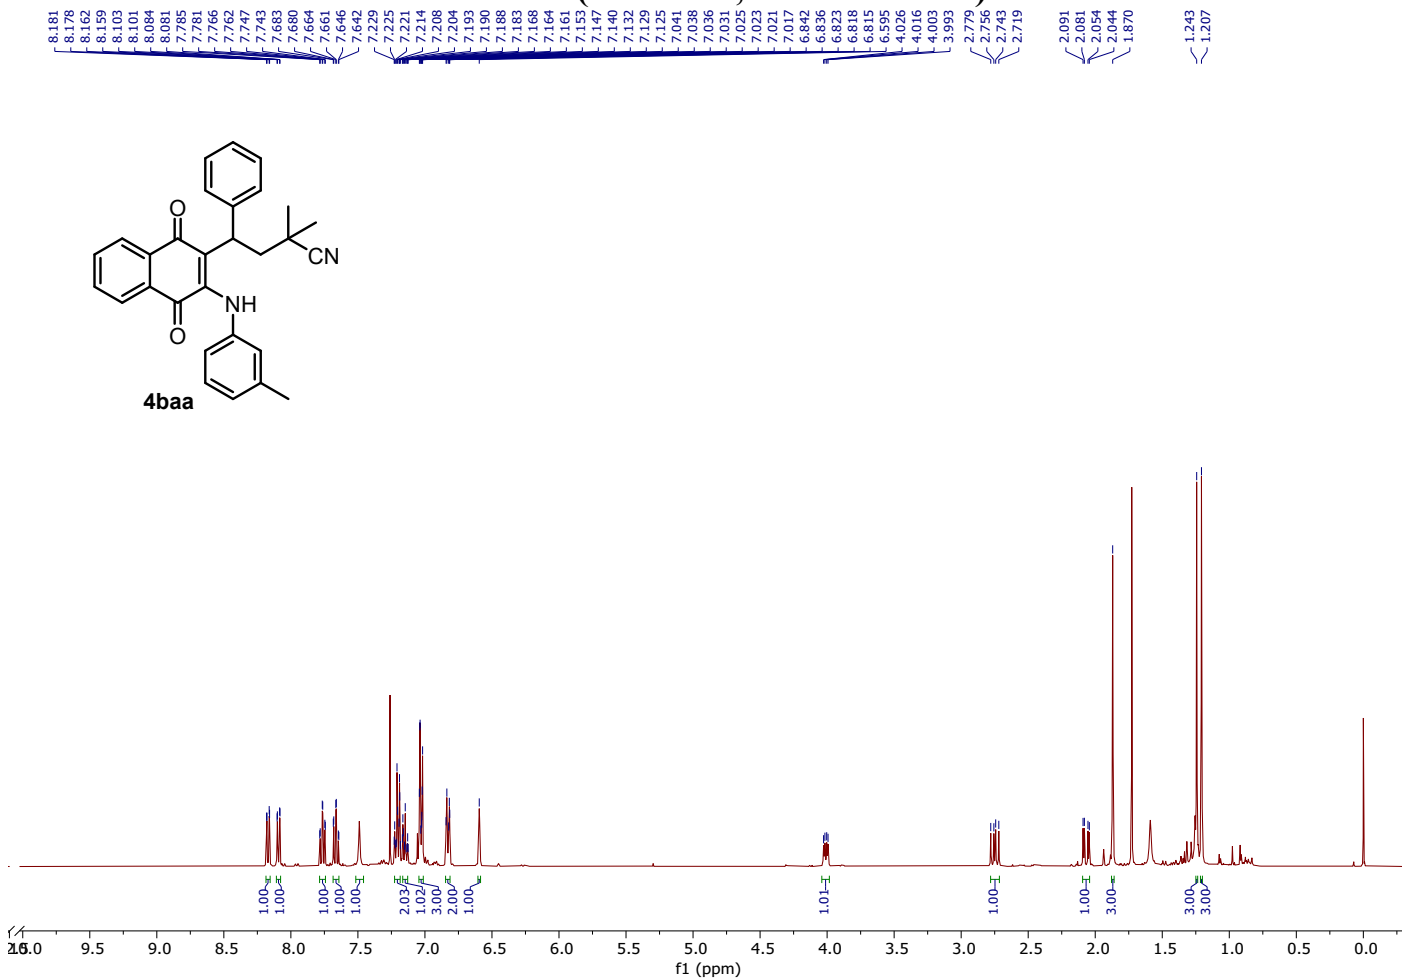

### <sup>13</sup>C-NMR (100 MHz, Chloroform-*d*)

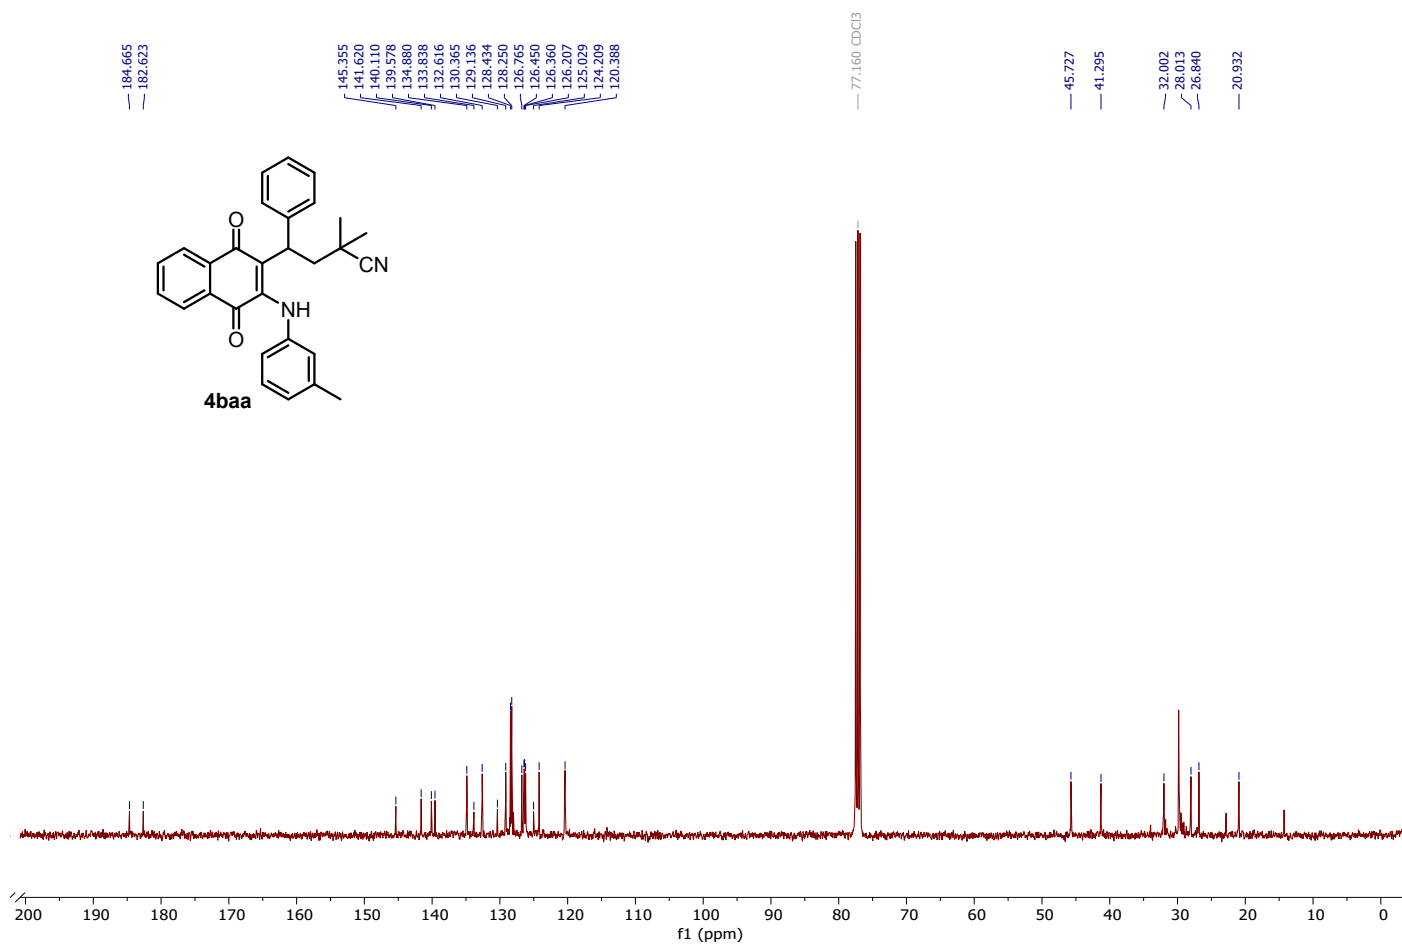

### <sup>1</sup>H-NMR (400 MHz, Chloroform-*d*)

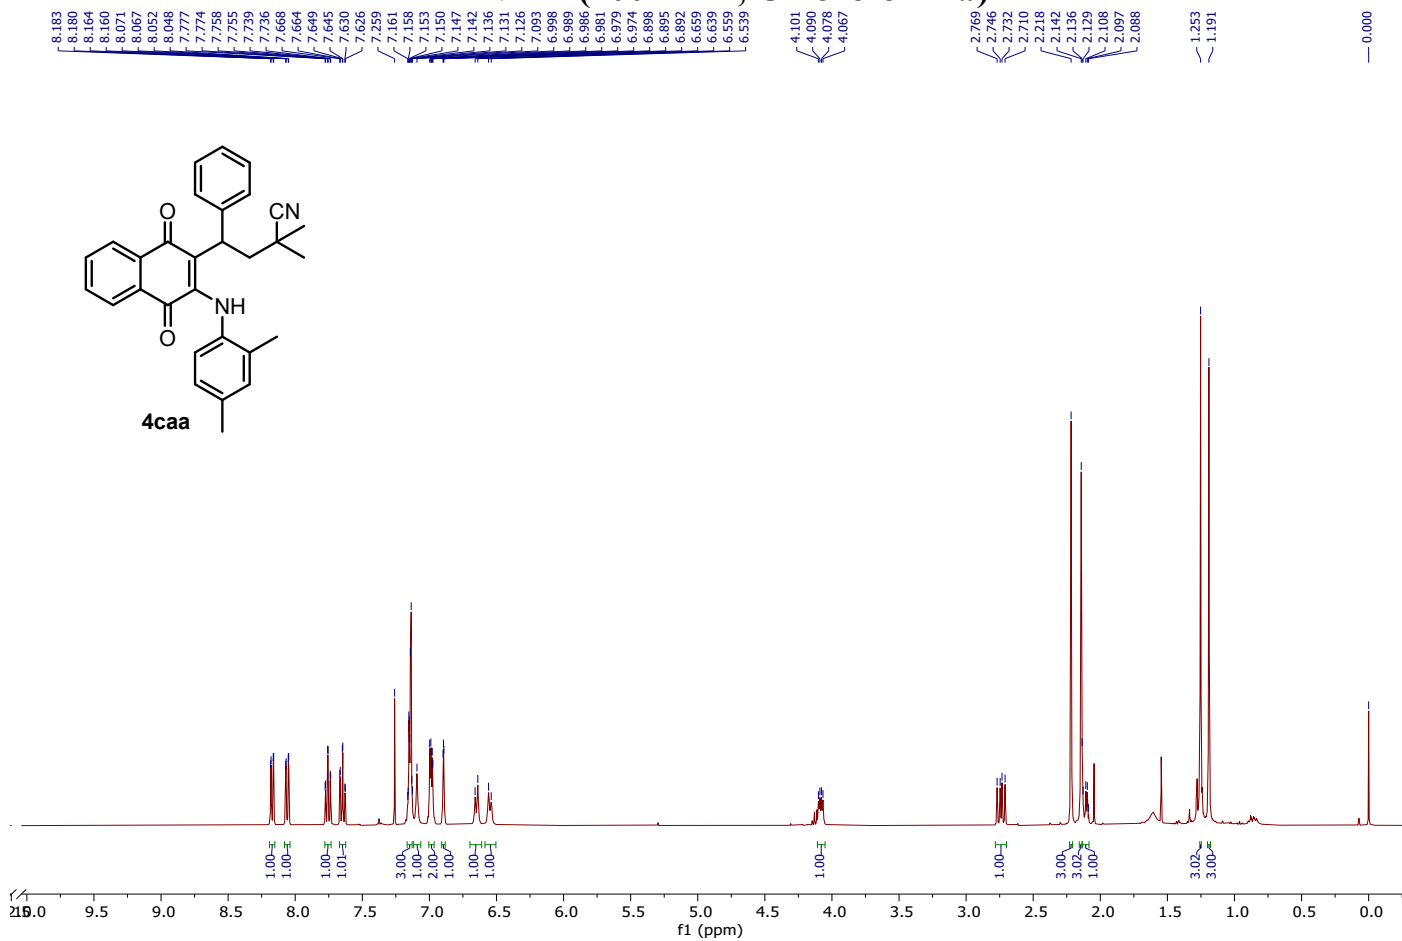

# <sup>13</sup>C-NMR (100 MHz, Chloroform-*d*)

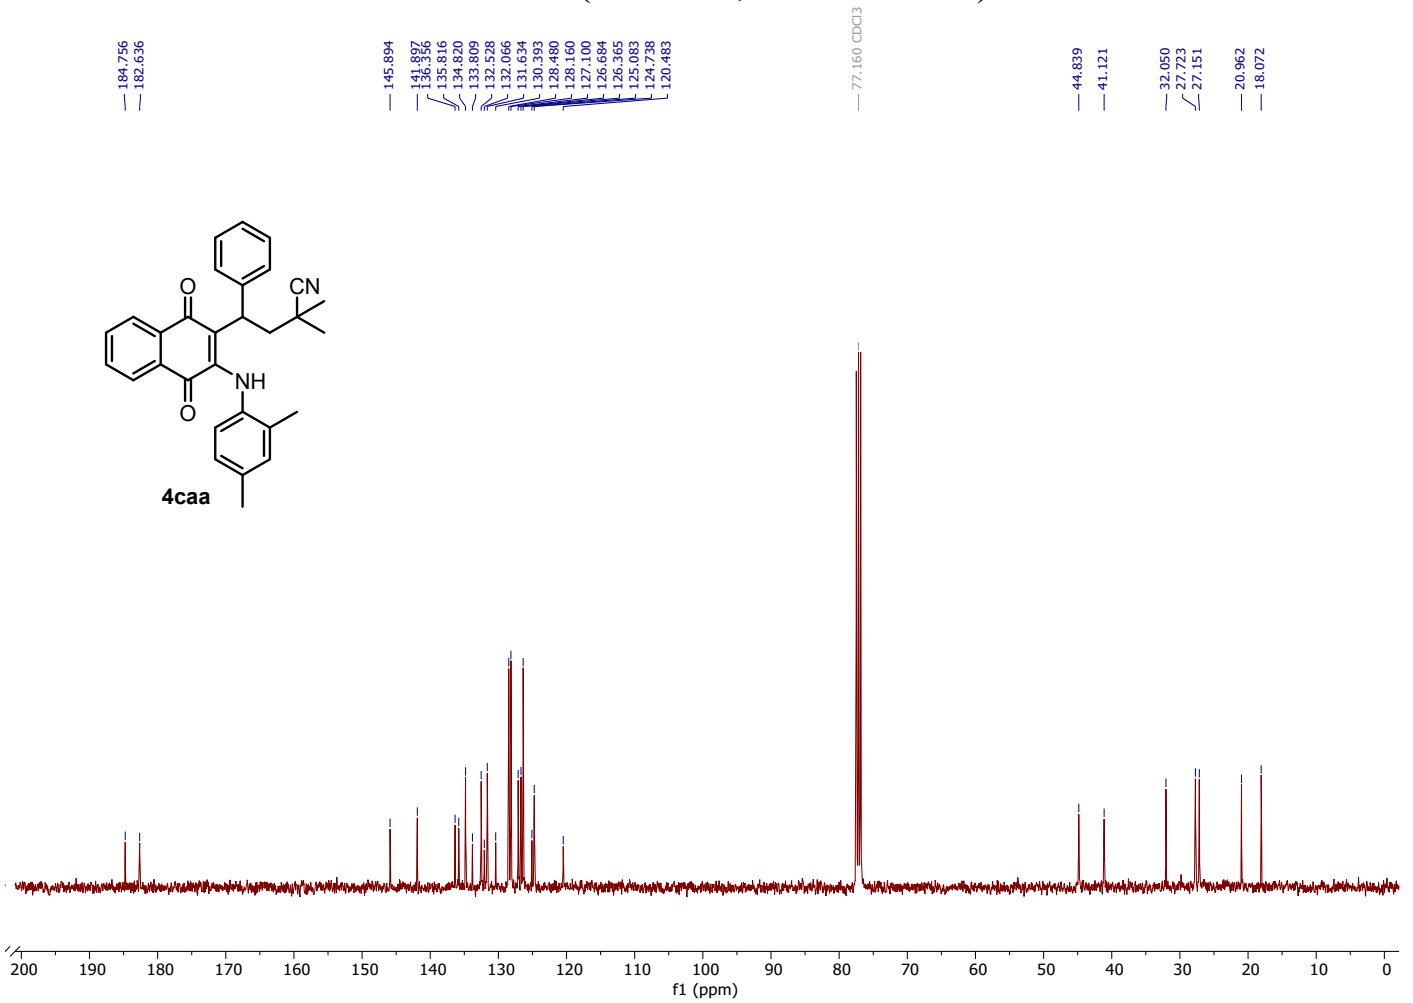

# <sup>1</sup>H-NMR (400 MHz, Chloroform-*d*)

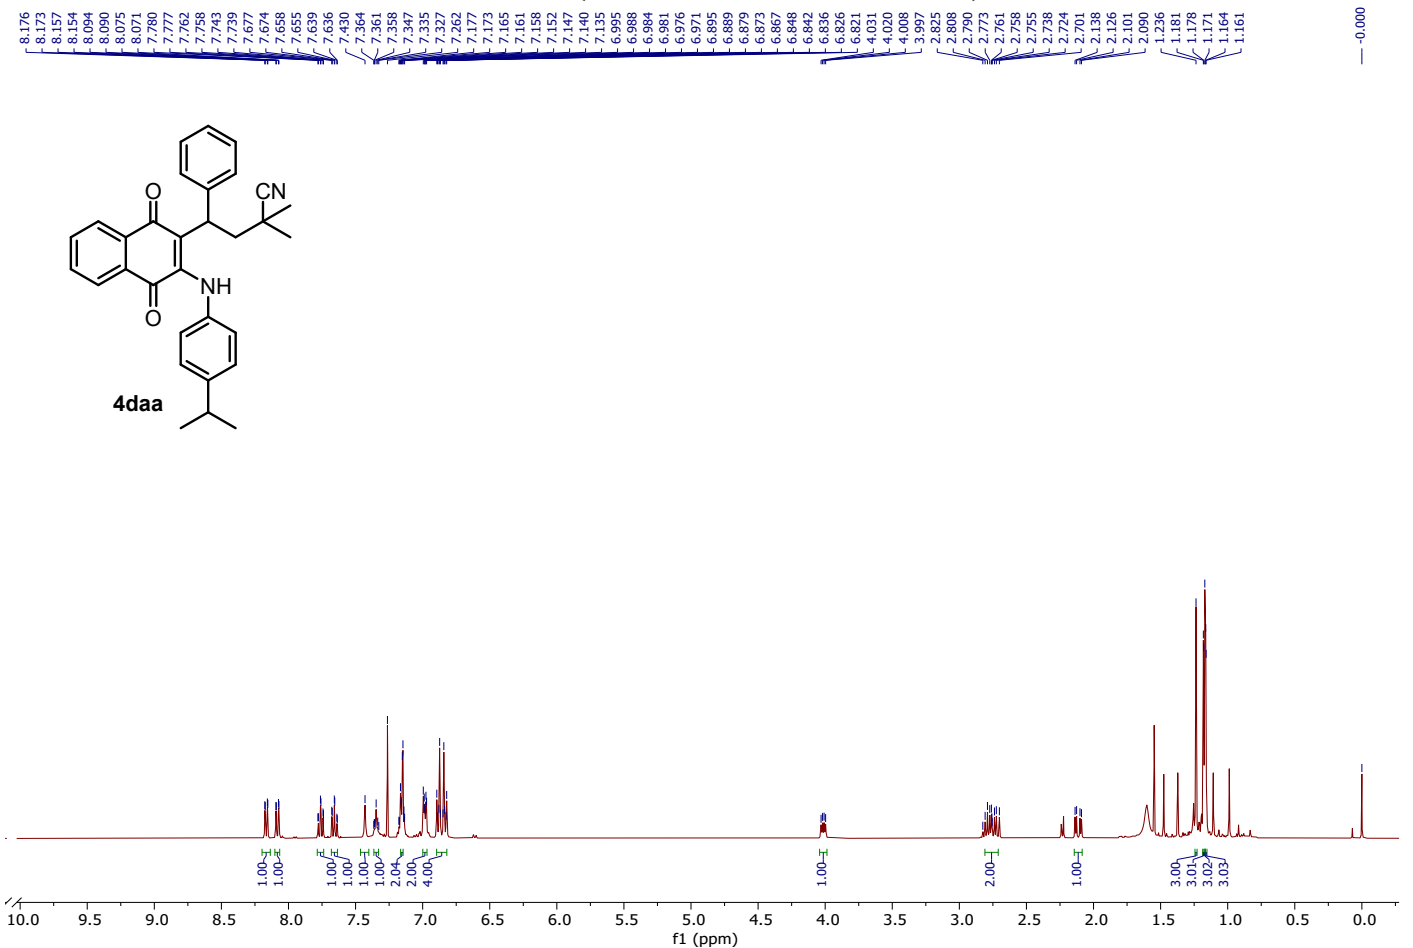

# <sup>13</sup>C-NMR (100 MHz, Chloroform-*d*)

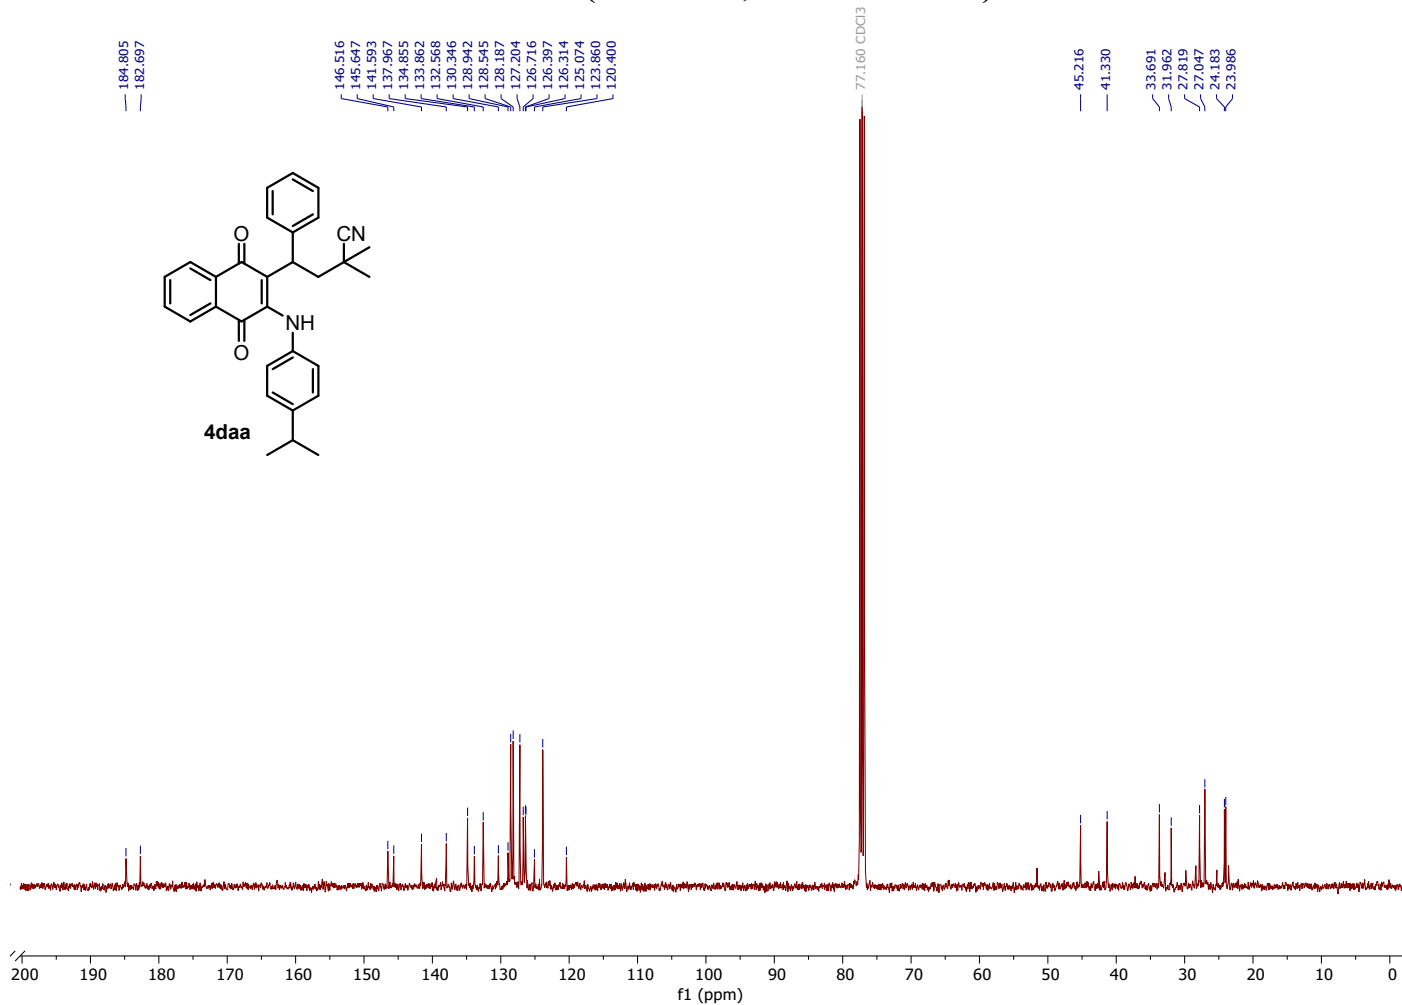

# <sup>1</sup>H-NMR (400 MHz, Chloroform-*d*)

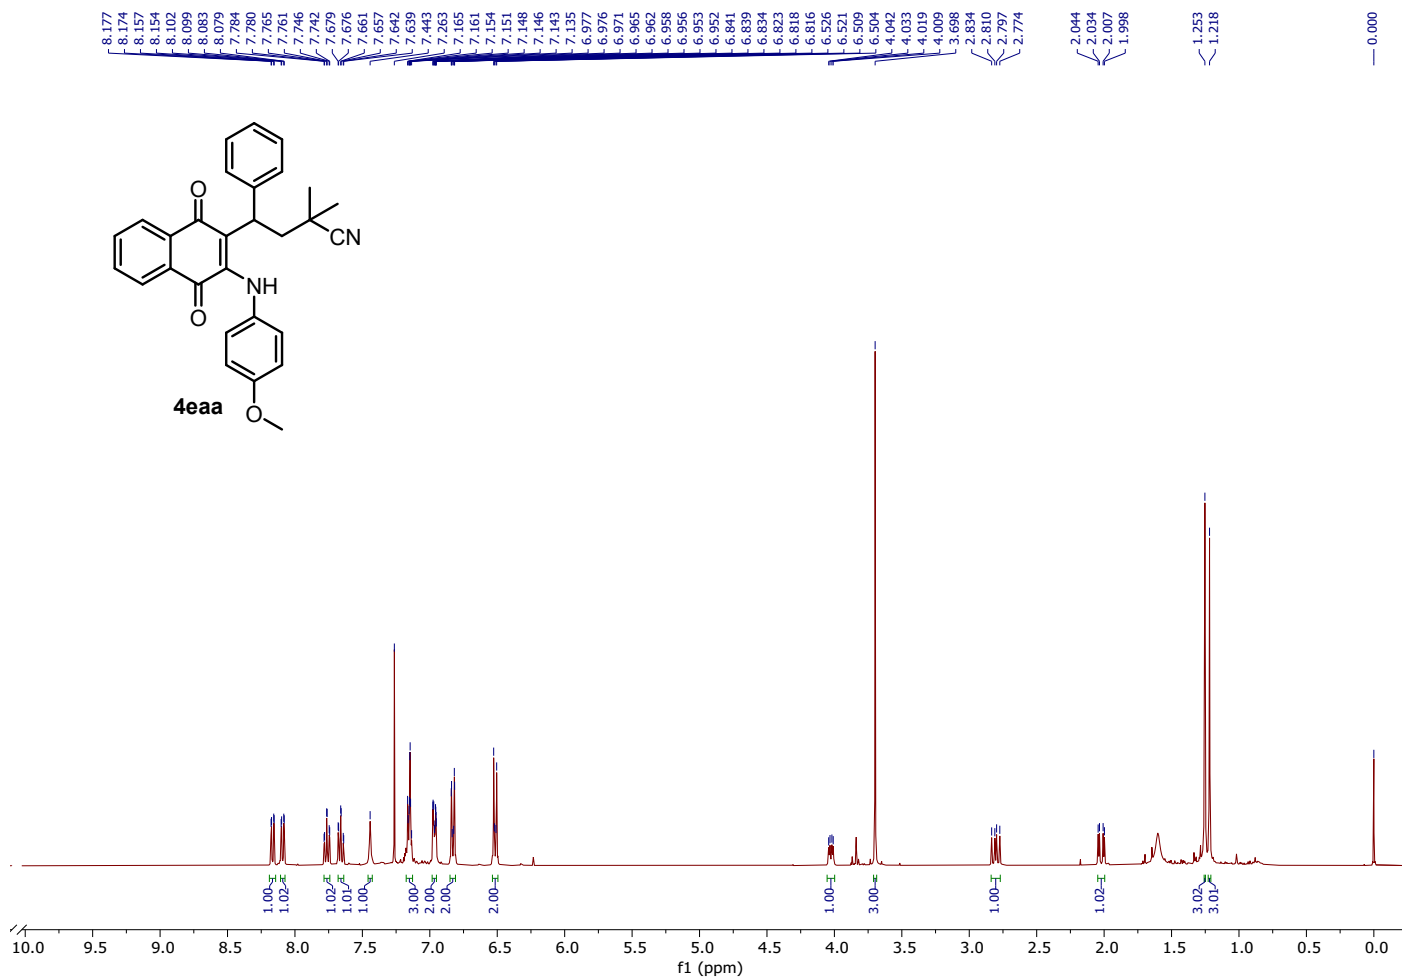

**<sup>13</sup>C-NMR (100 MHz, Chloroform-*d*)**

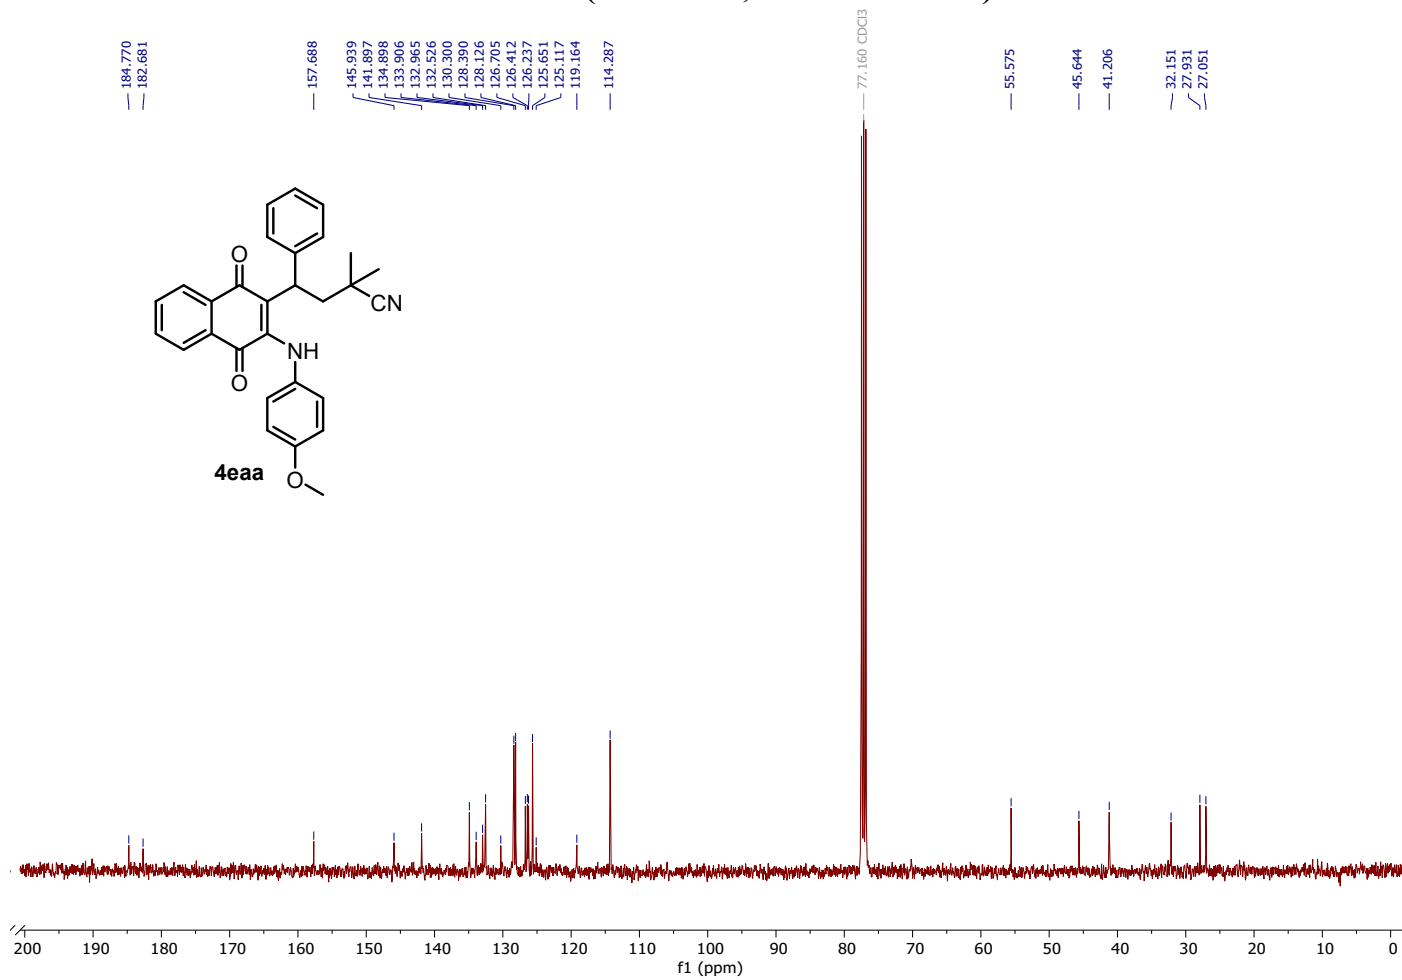



# <sup>1</sup>H-NMR (400 MHz, Chloroform-*d*)

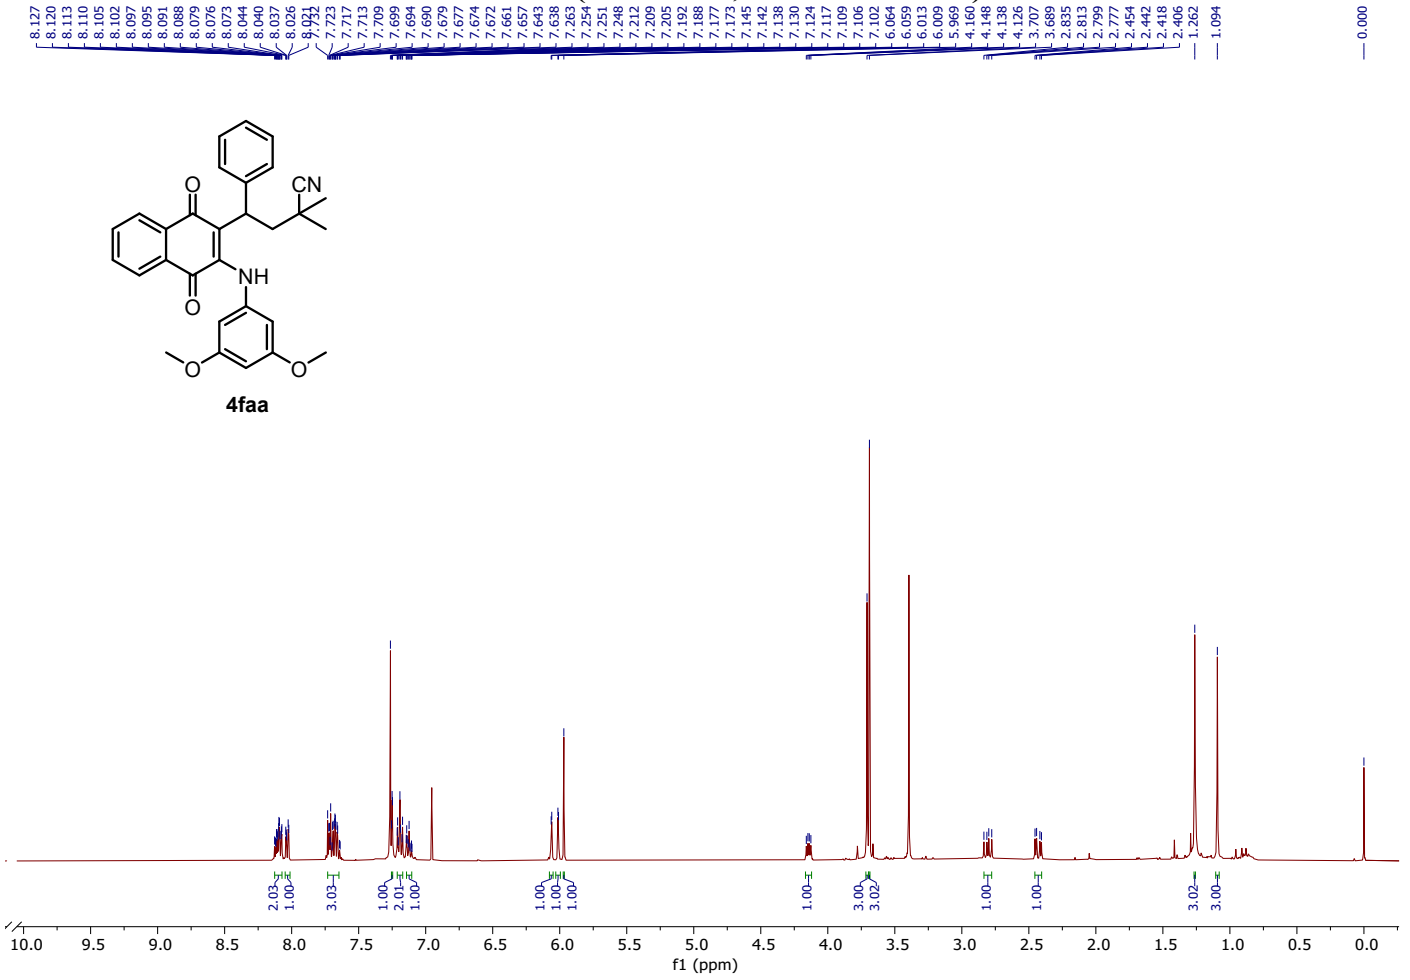

# <sup>13</sup>C-NMR (100 MHz, Chloroform-*d*)

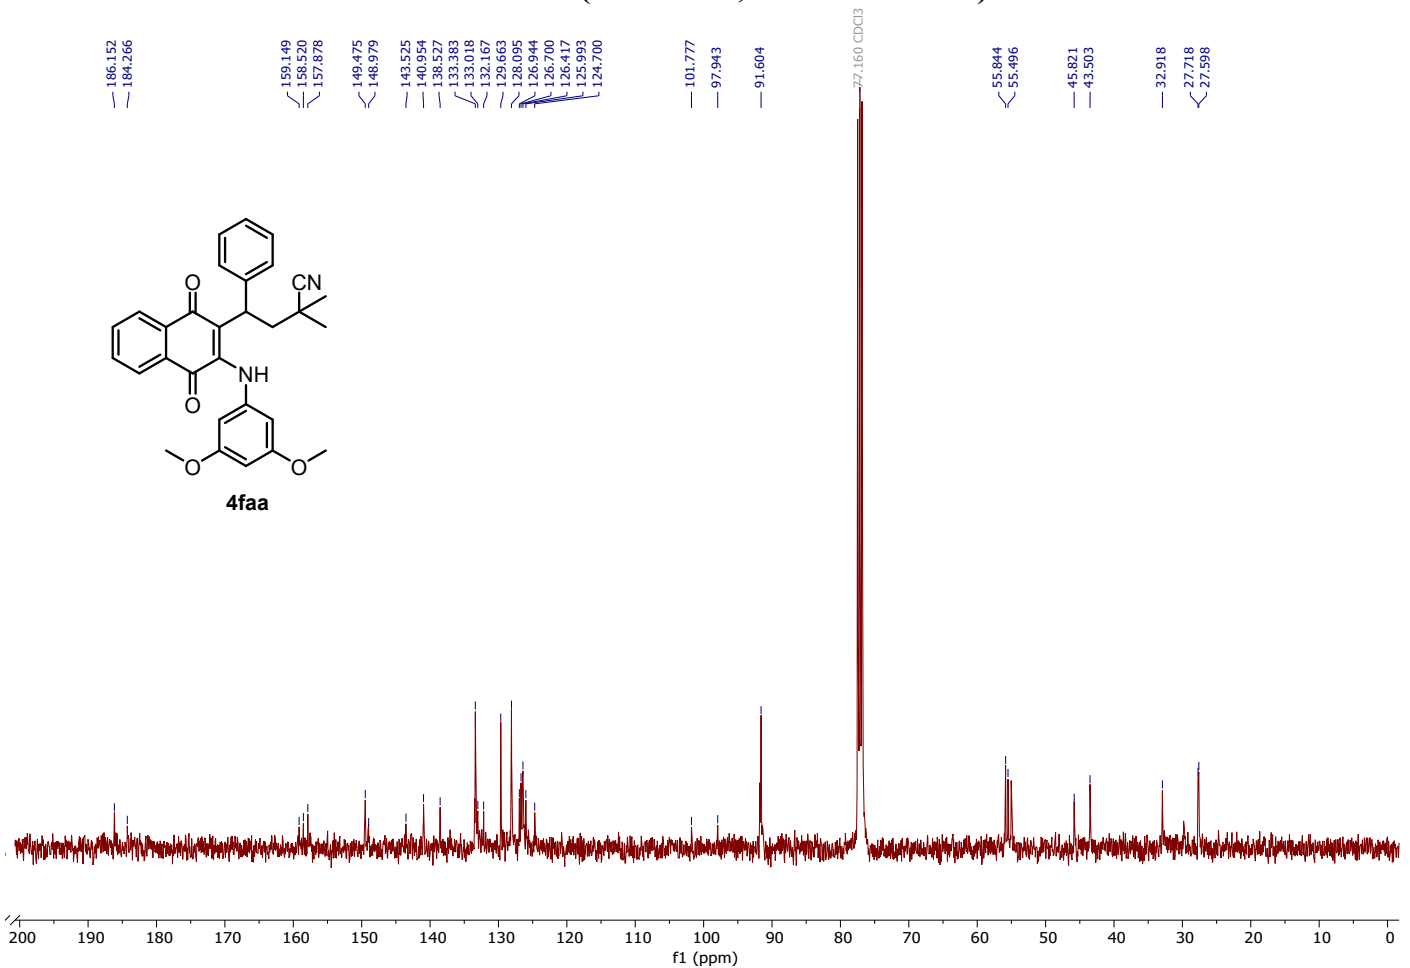

# <sup>1</sup>H-NMR (400 MHz, Chloroform-d)

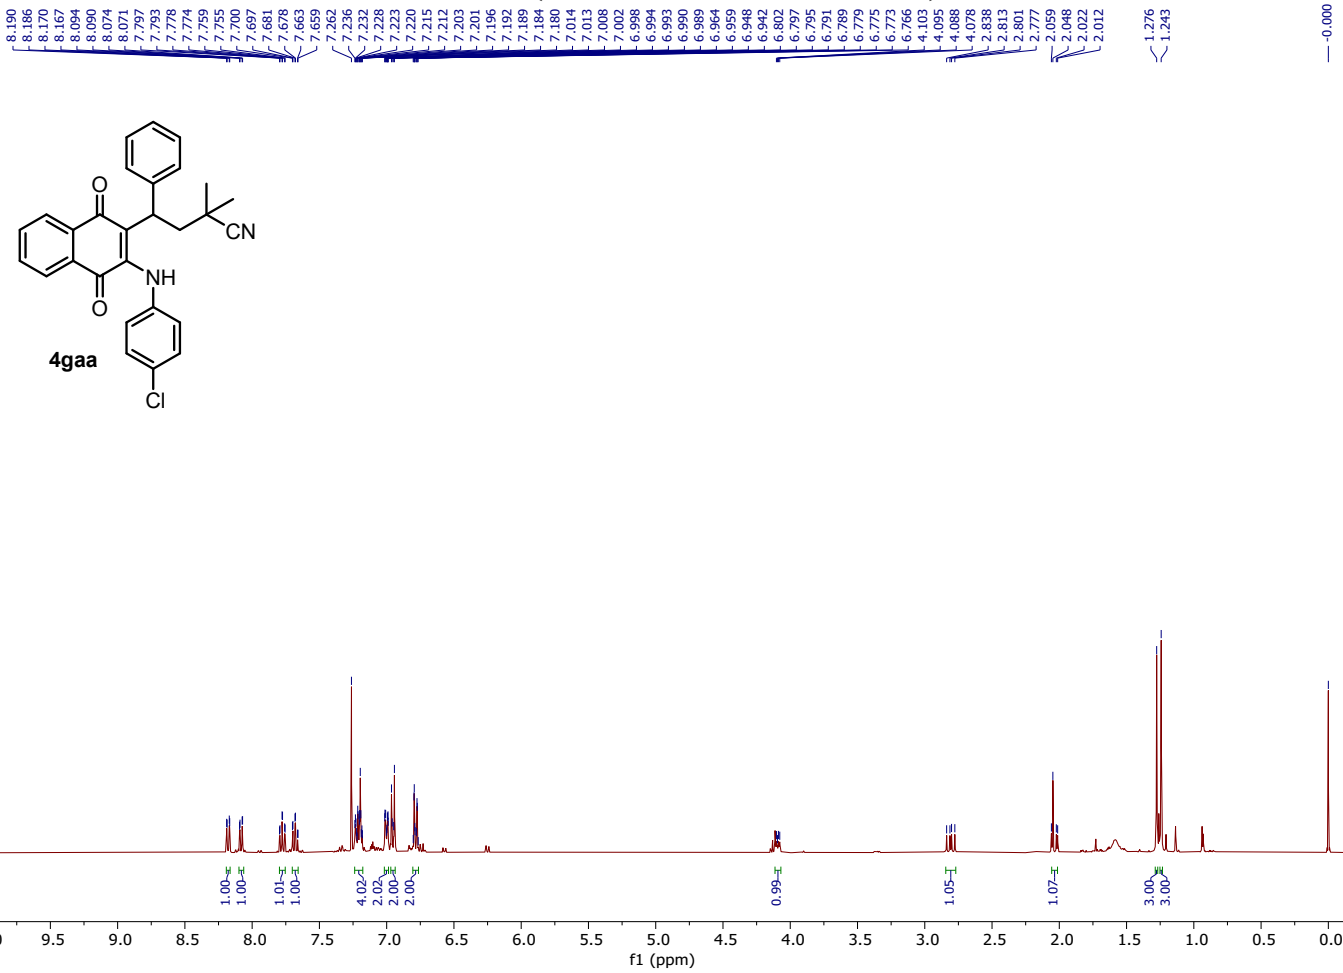

# <sup>13</sup>C-NMR (100 MHz, Chloroform-d)

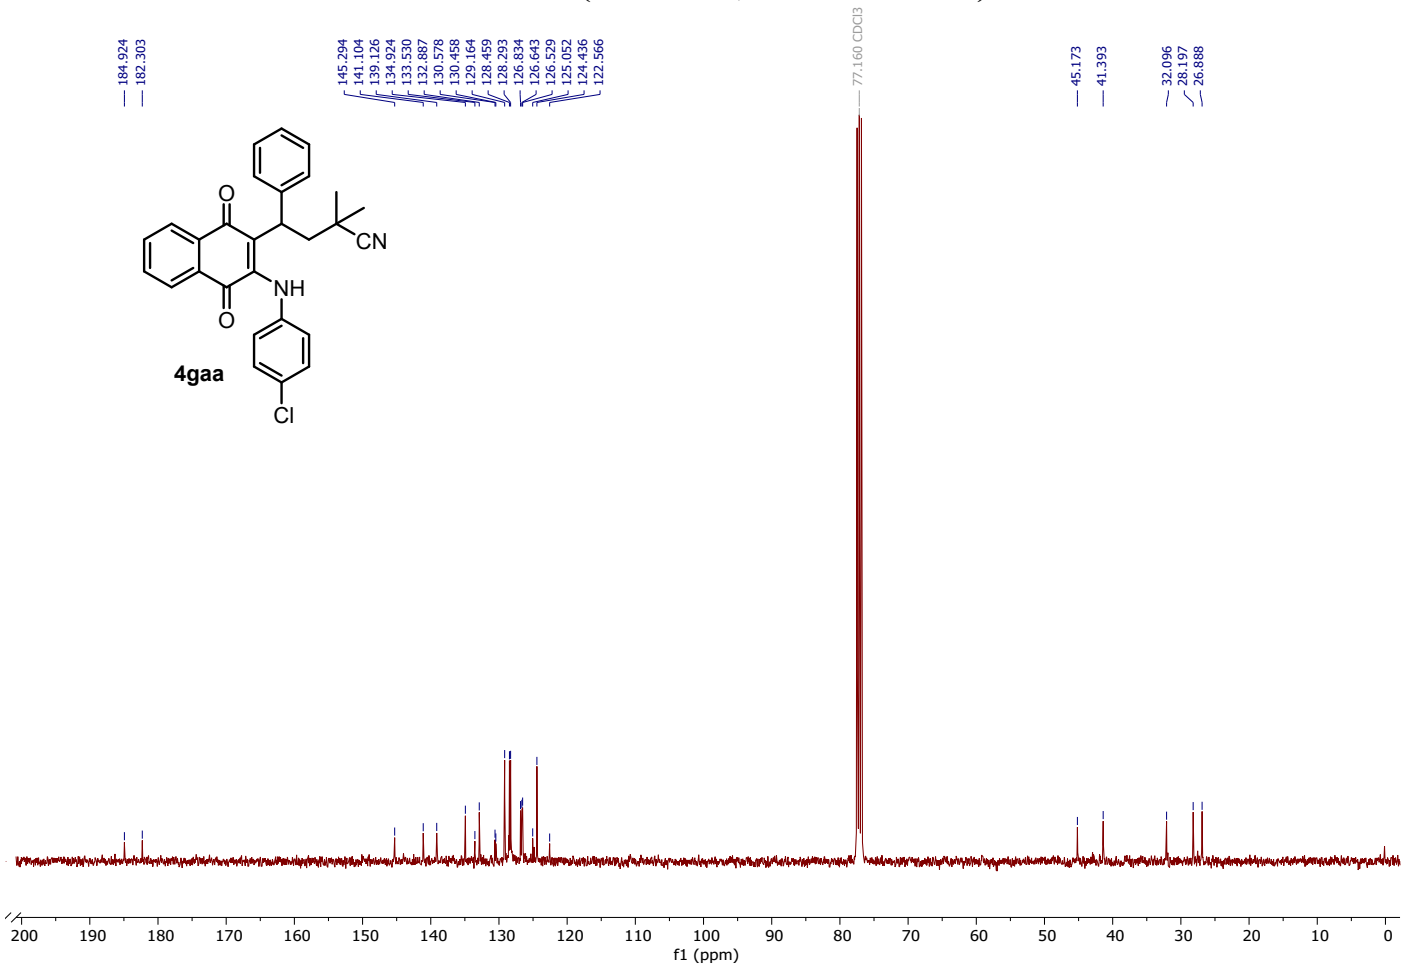

# <sup>1</sup>H-NMR (400 MHz, Chloroform-d)

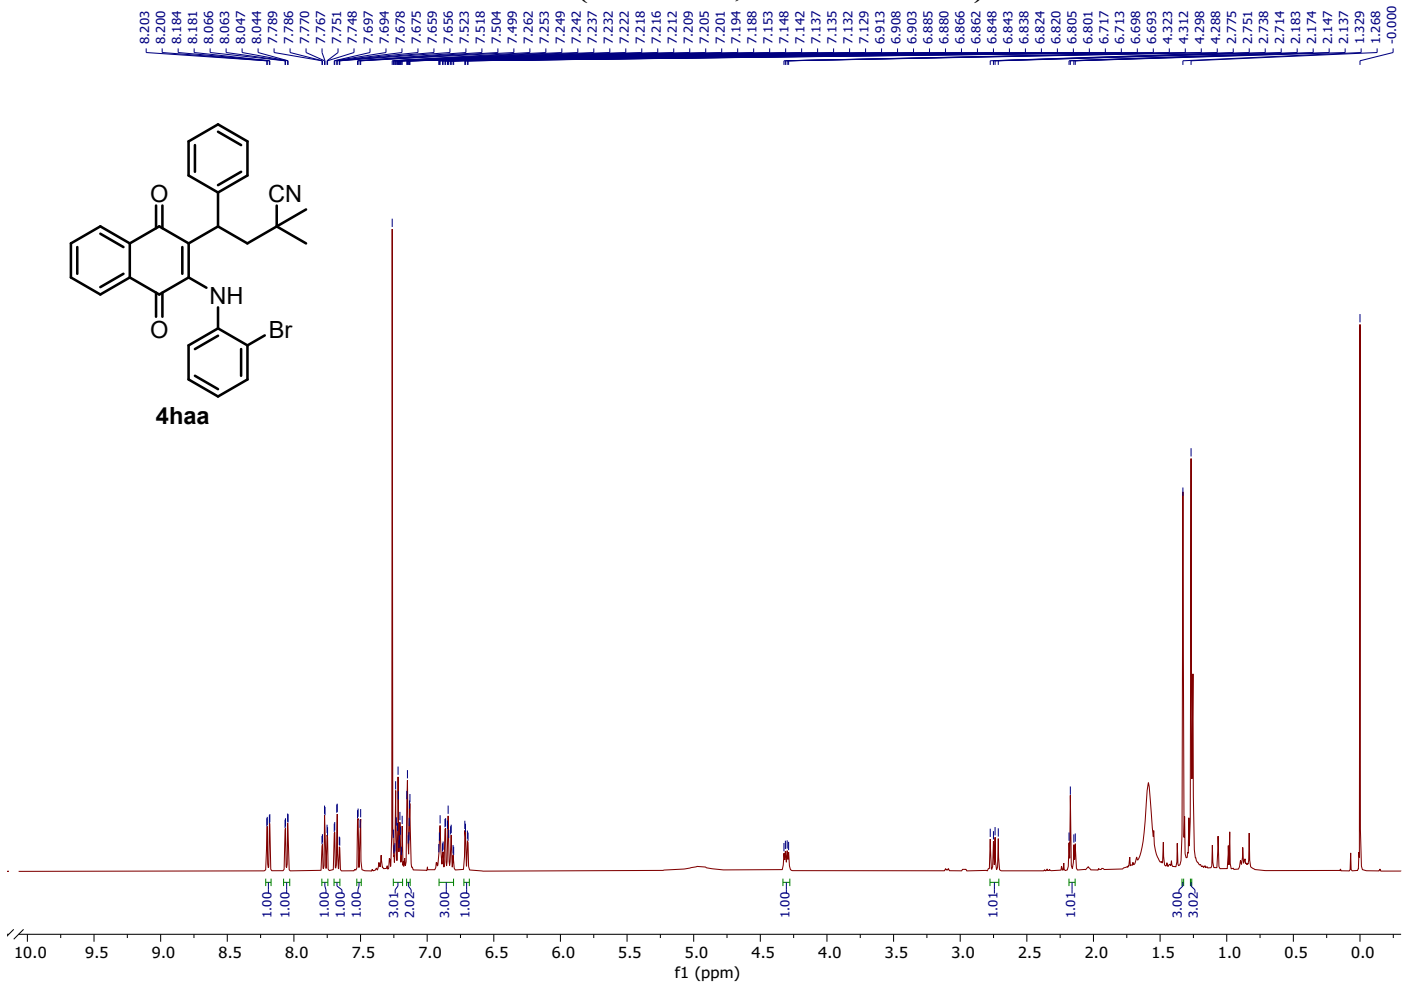

# <sup>13</sup>C-NMR (100 MHz, Chloroform-d)

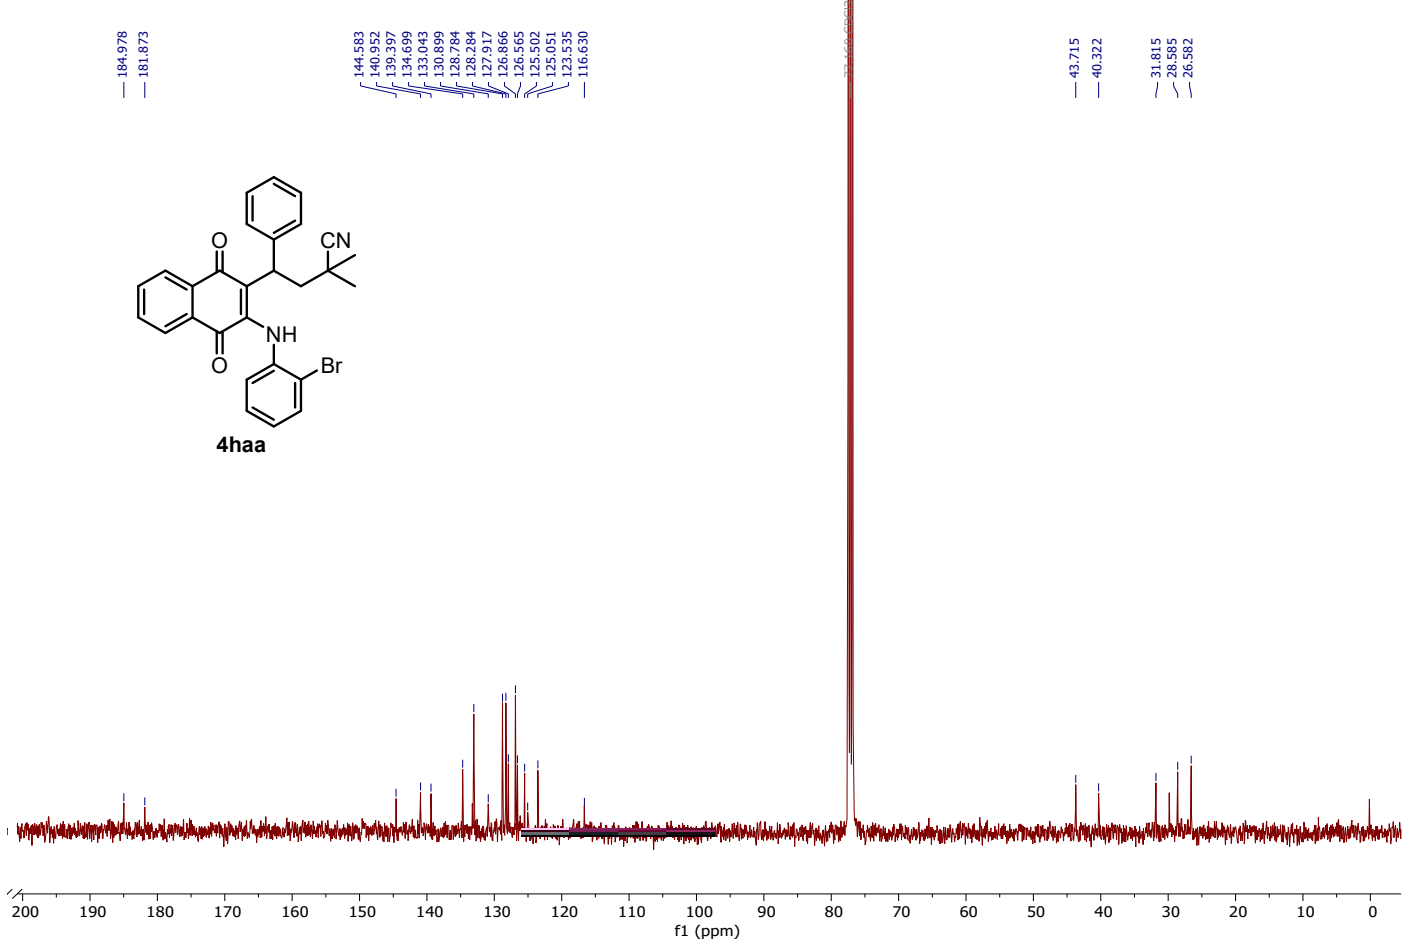

# <sup>1</sup>H-NMR (400 MHz, Chloroform-*d*)

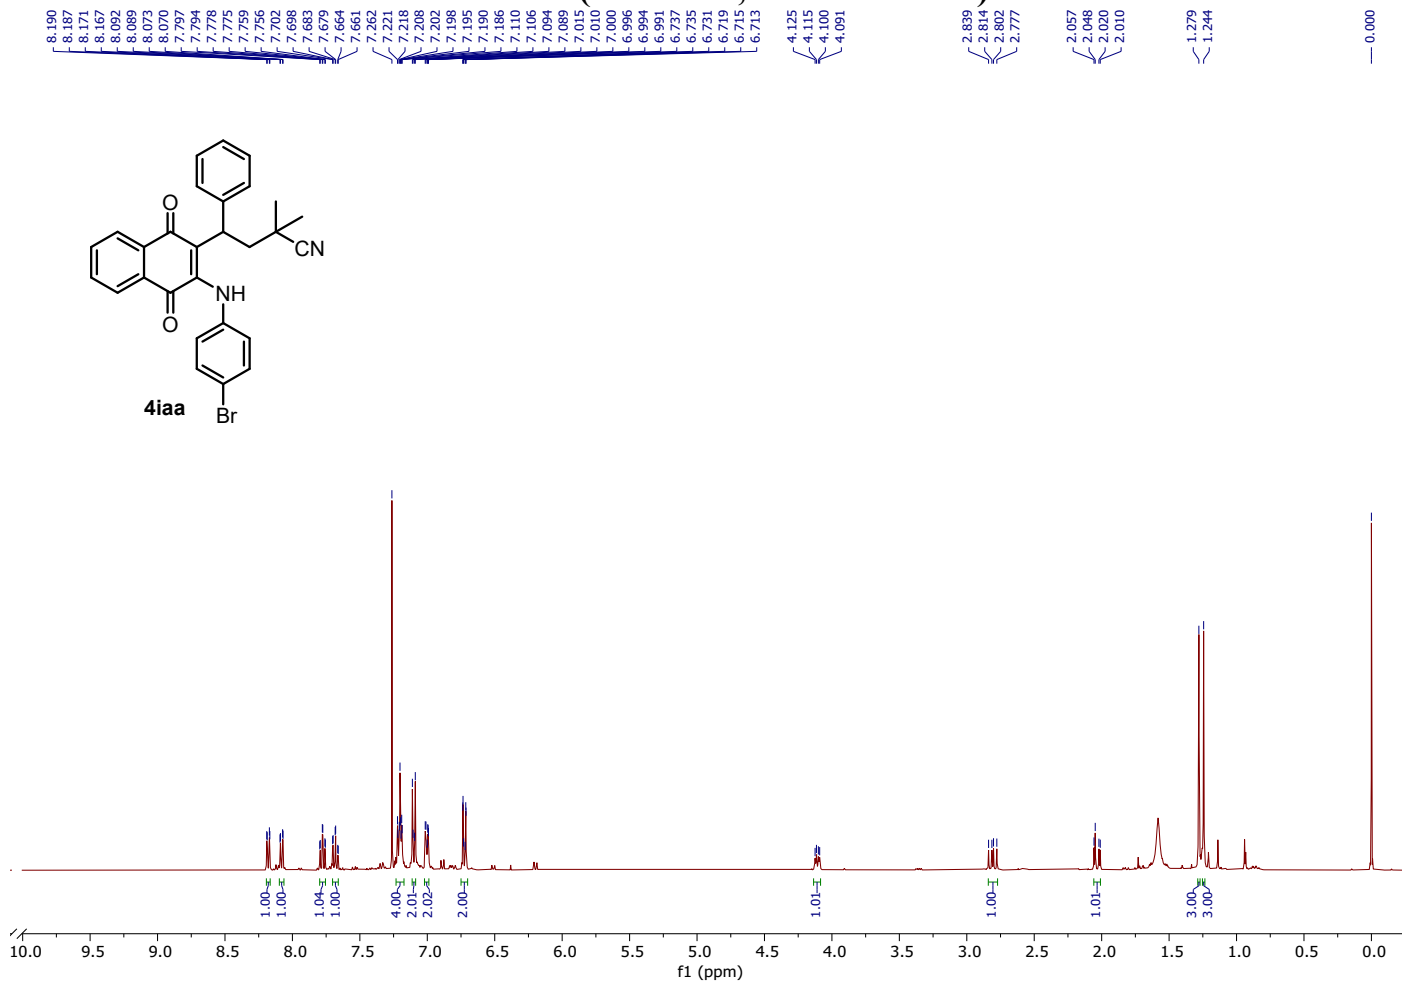

# <sup>13</sup>C-NMR (100 MHz, Chloroform-*d*)

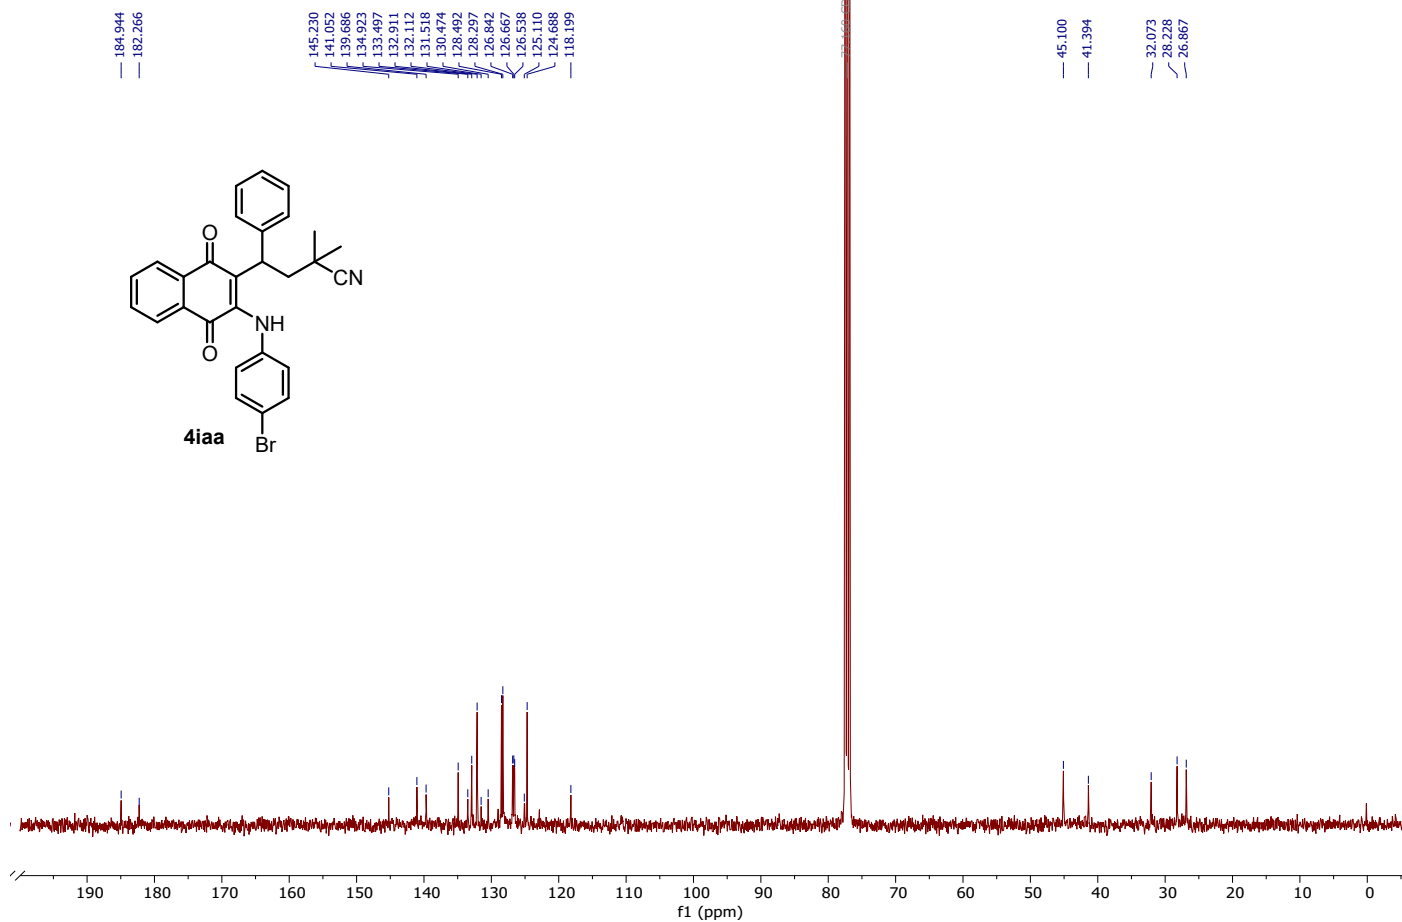

# <sup>1</sup>H-NMR (400 MHz, Chloroform-*d*)

8.188, 8.185, 8.169, 8.165, 8.091, 8.087, 8.071, 8.068, 7.797, 7.793, 7.778, 7.774, 7.759, 7.755, 7.704, 7.700, 7.685, 7.681, 7.666, 7.663, 7.264, 7.229, 7.223, 7.219, 7.215, 7.211, 7.202, 7.198, 7.193, 7.186, 7.175, 7.092, 7.087, 7.076, 7.070, 7.048, 7.032, 7.032, 7.032, 7.011, 7.007, 6.991, 6.970, 6.730, 6.728, 6.719, 6.715, 6.697, 6.691, 6.675, 6.671, 6.584, 6.579, 6.573, 6.559, 6.554, 6.548, 4.166, 4.155, 4.143, 4.132, 2.763, 2.740, 2.727, 2.704, 2.205, 2.193, 2.168, 2.157, 1.273, 1.235, 0.000

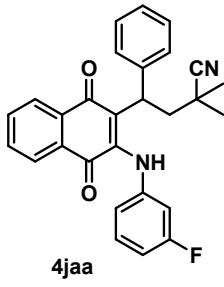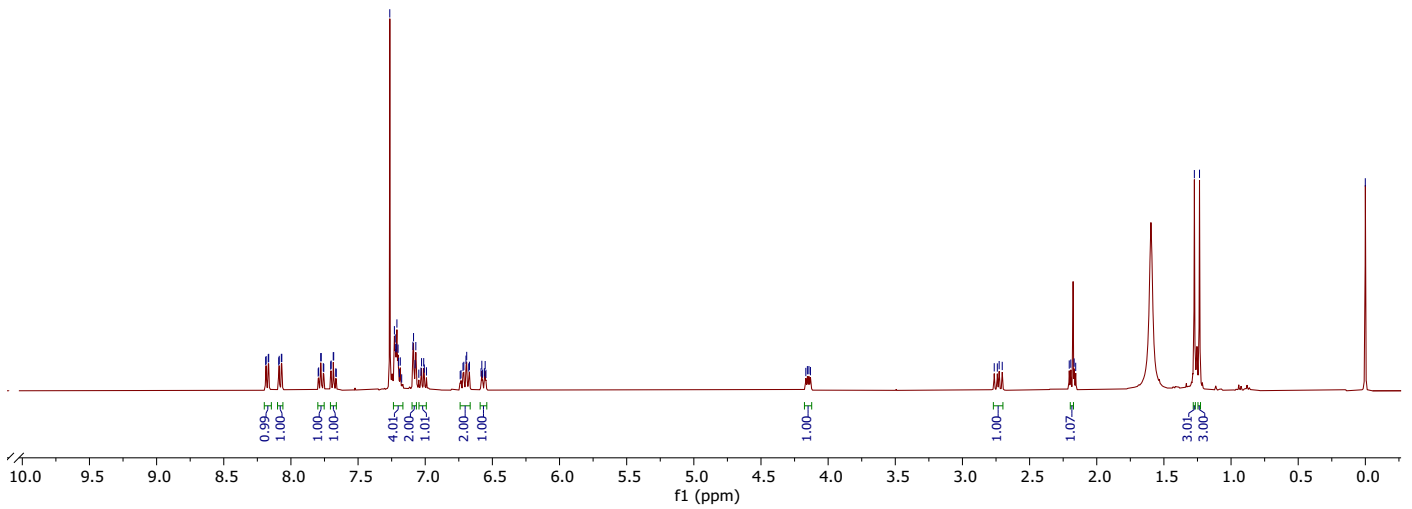

# <sup>13</sup>C-NMR (100 MHz, Chloroform-*d*)

184.87, 182.26, 144.70, 140.87, 139.84, 135.42, 132.92, 130.45, 130.34, 128.50, 128.32, 126.82, 126.75, 126.50, 124.93, 124.29, 118.25, 111.83, 111.62, 110.00, 109.73, 44.67, 41.38, 31.96, 28.18, 26.88

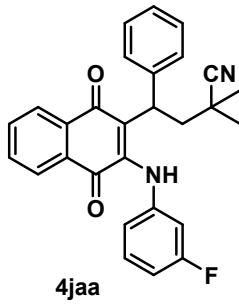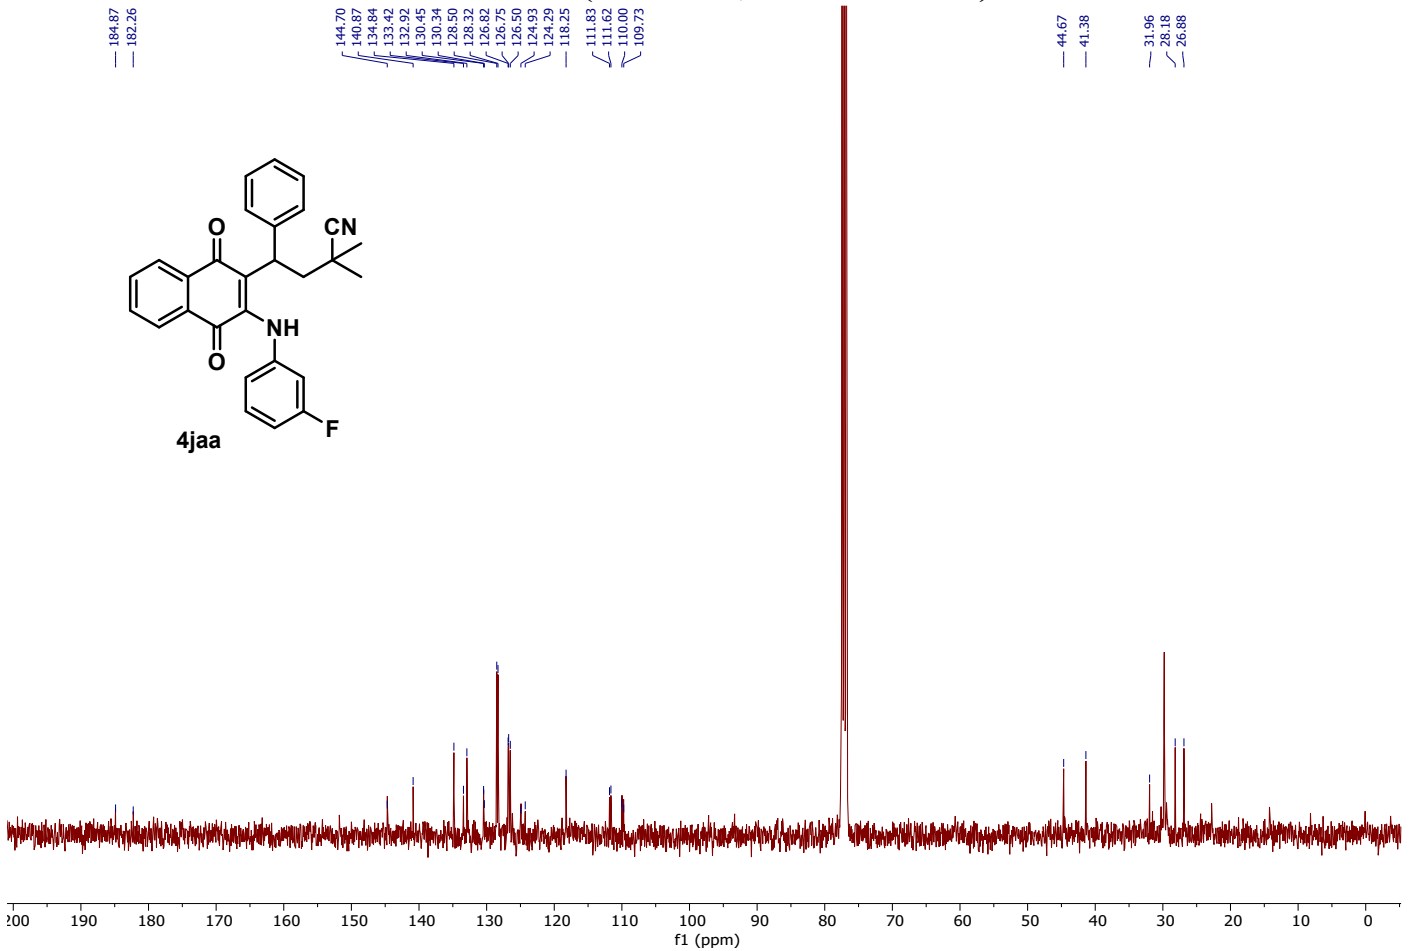

# <sup>1</sup>H-NMR (500 MHz, Chloroform-*d*)

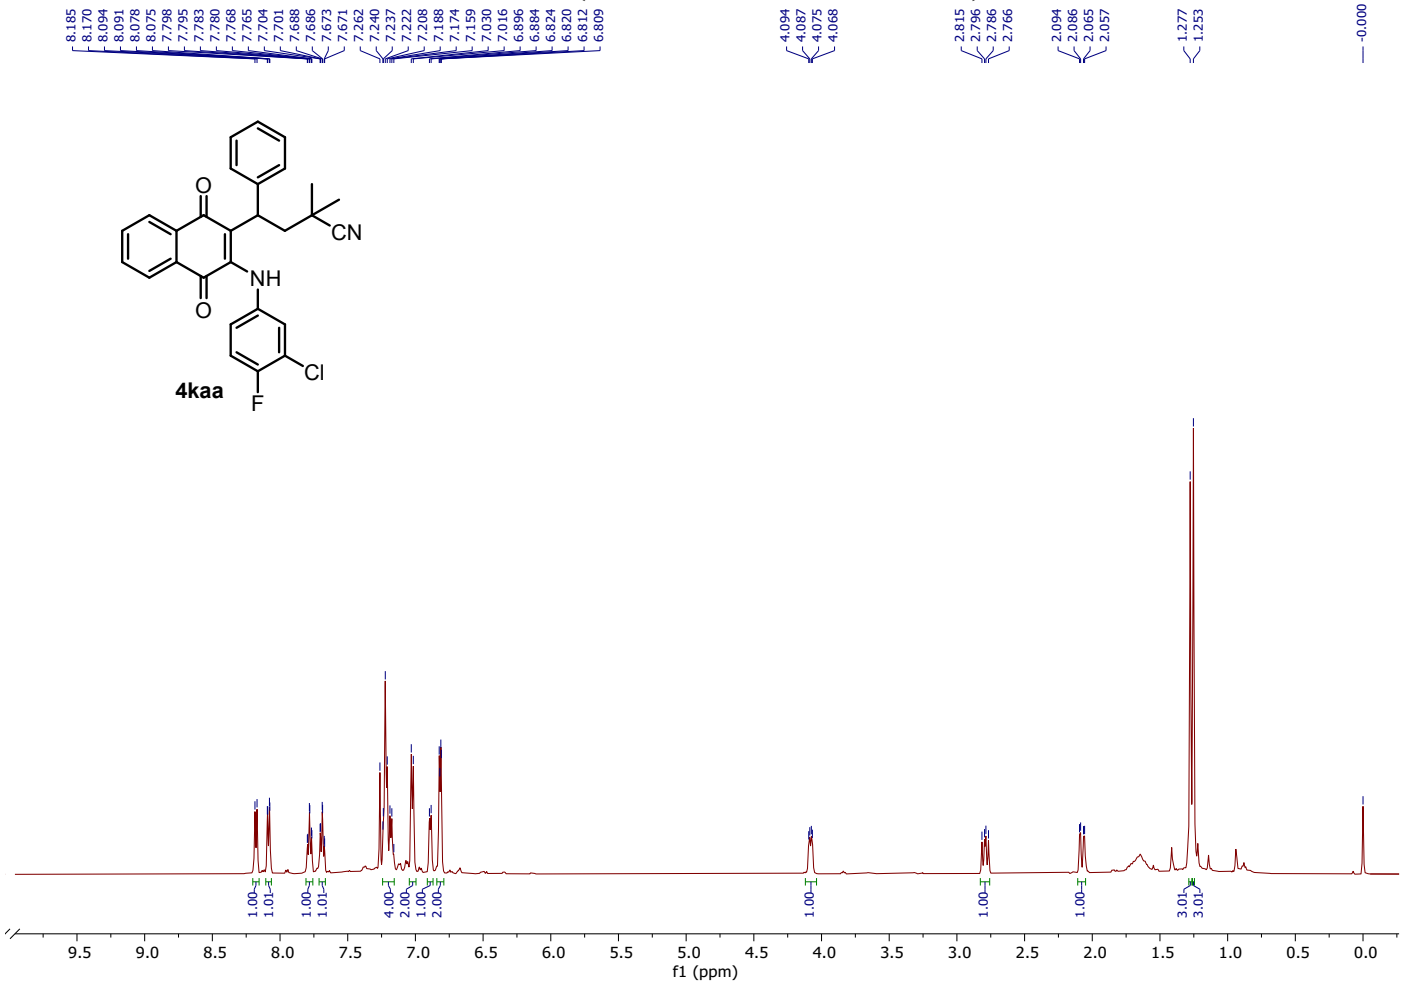

# <sup>13</sup>C-NMR (100 MHz, Chloroform-*d*)

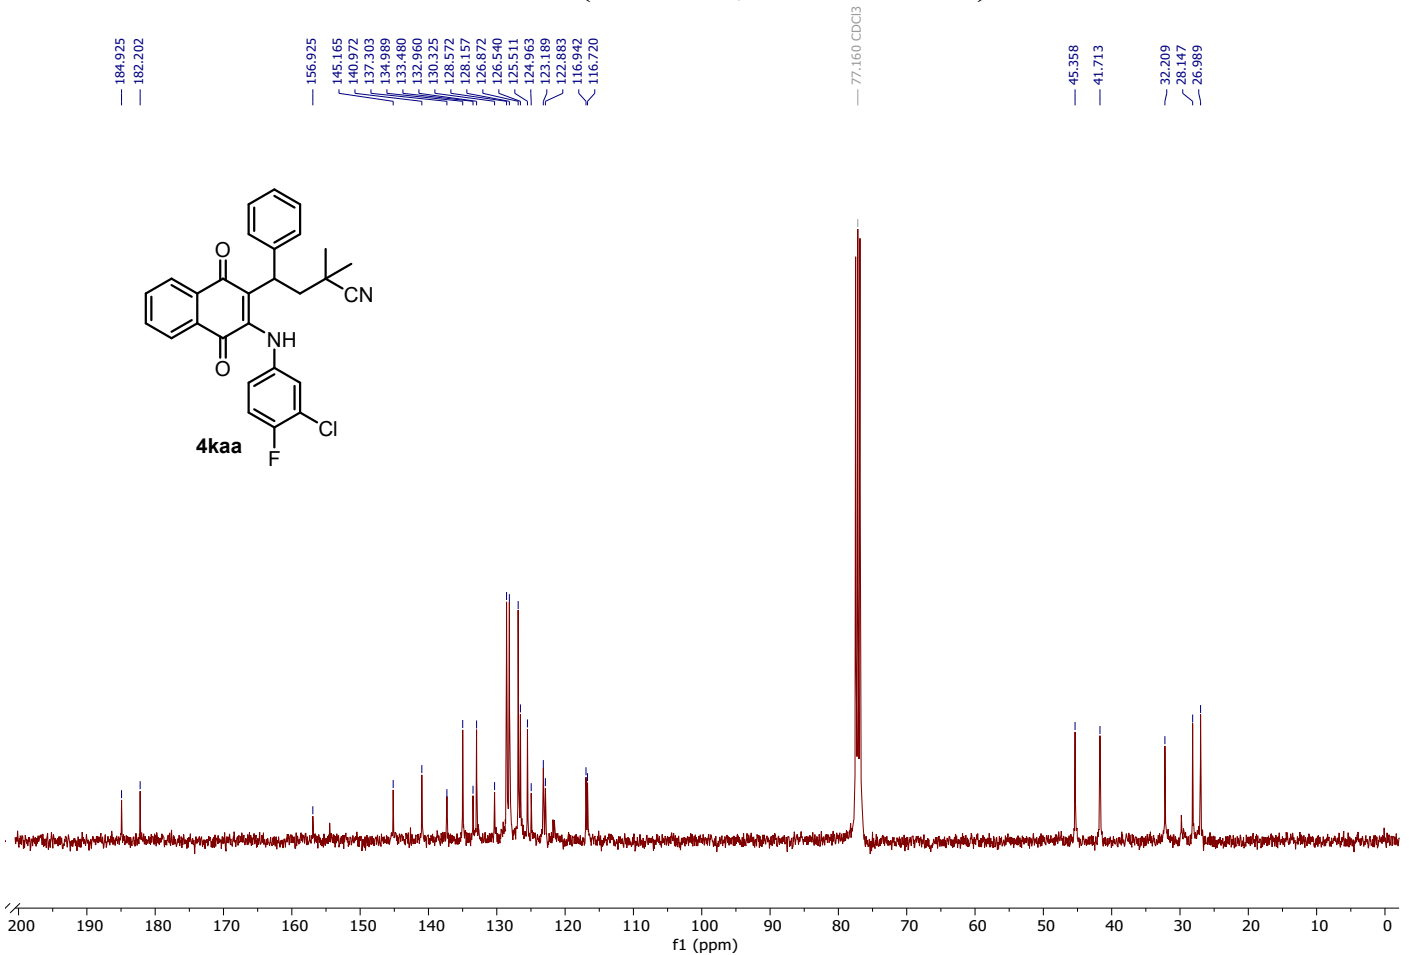

# <sup>1</sup>H-NMR (400 MHz, Chloroform-*d*)

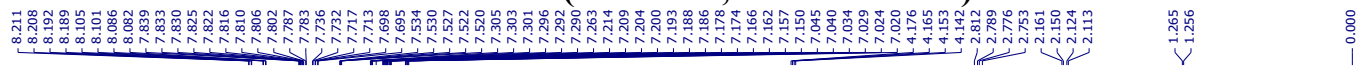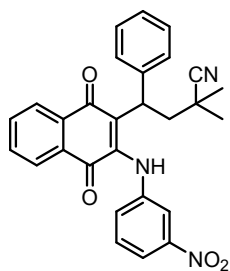

41aa

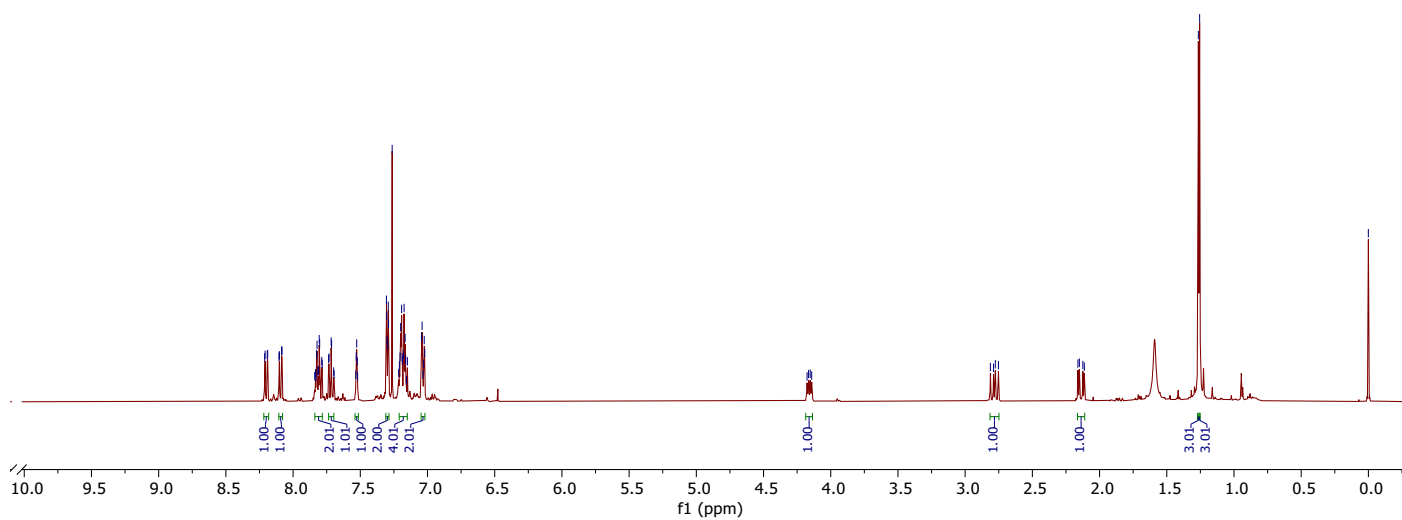

# <sup>13</sup>C-NMR (100 MHz, Chloroform-*d*)

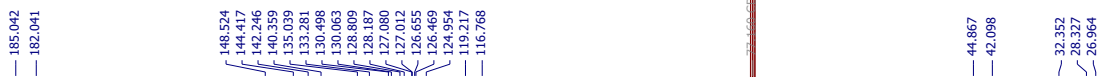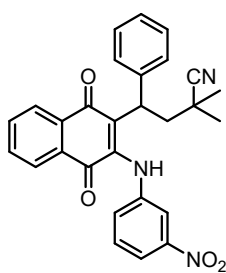

41aa

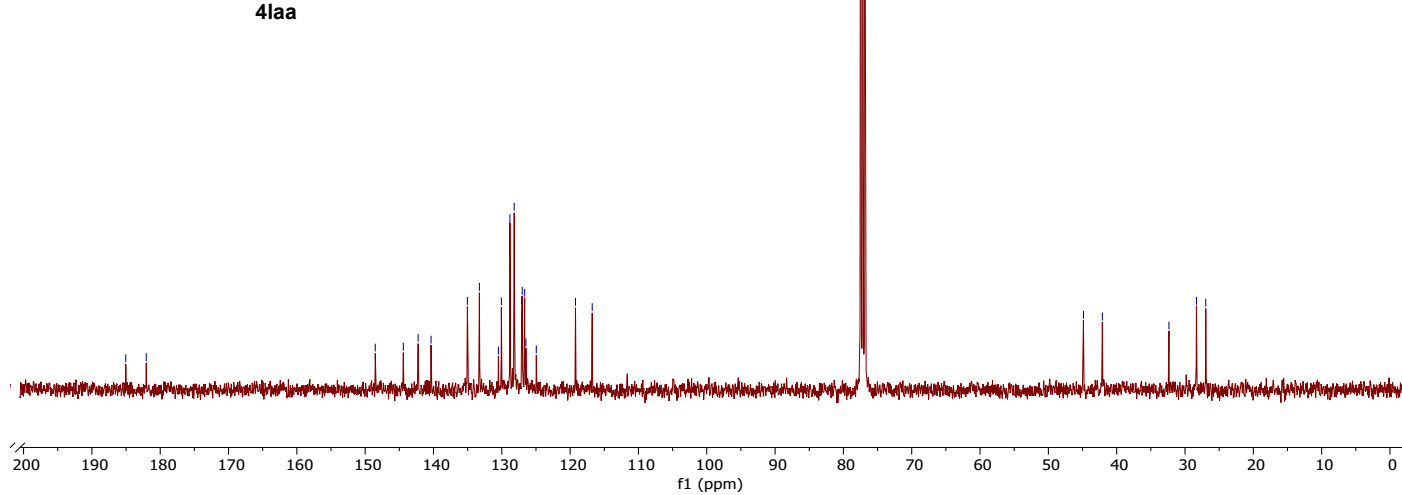





# <sup>1</sup>H-NMR (400 MHz, Chloroform-d)

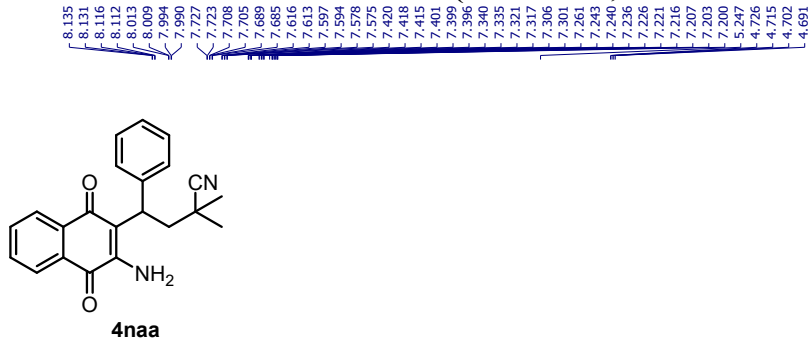

0.000

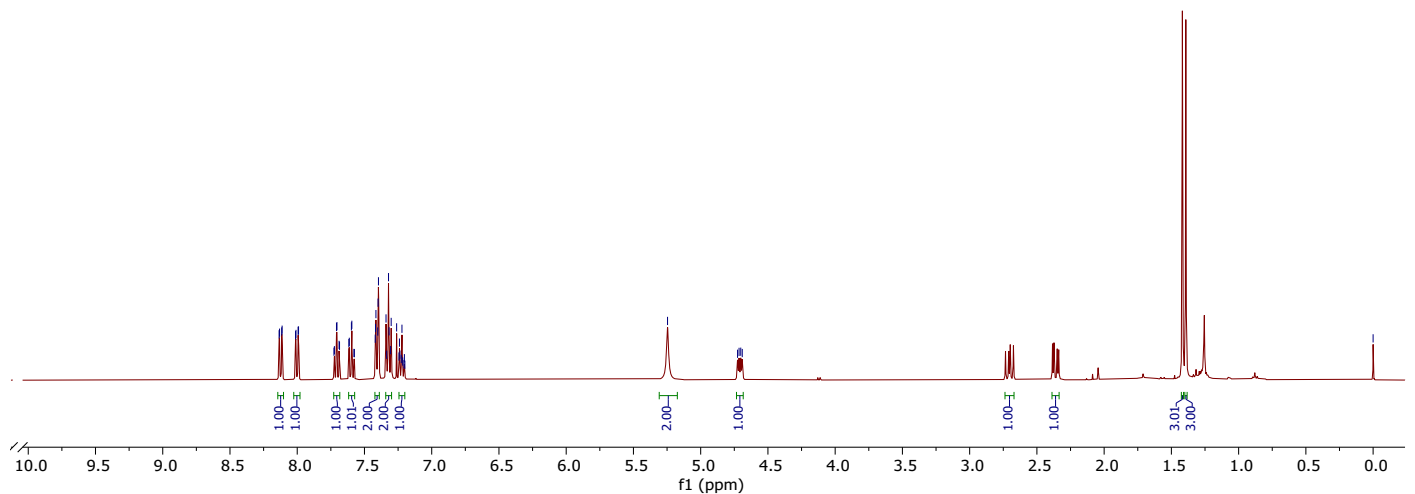

# <sup>13</sup>C-NMR (100 MHz, Chloroform-d)

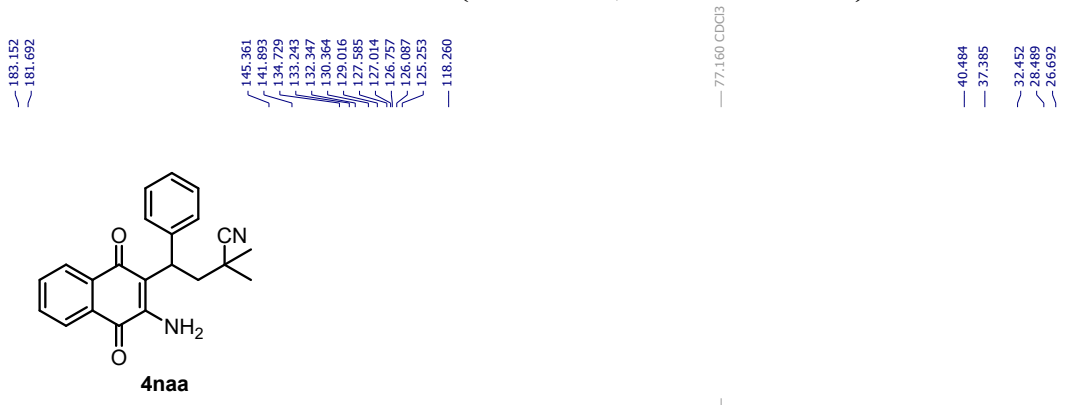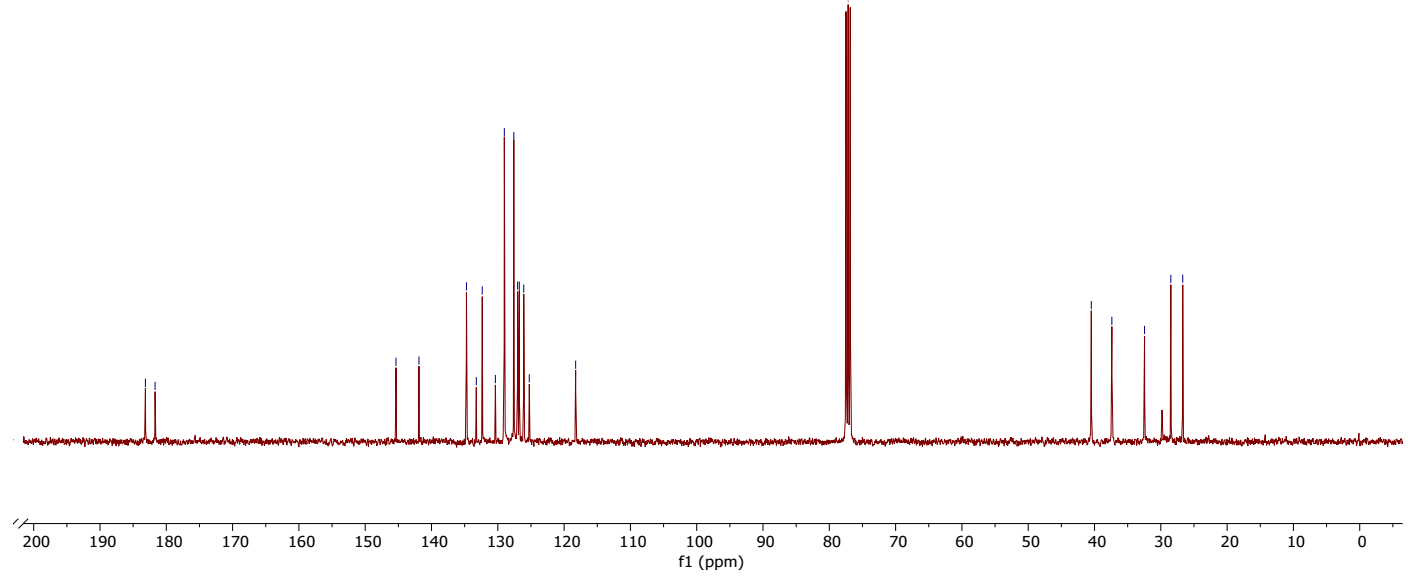

# <sup>1</sup>H-NMR (400 MHz, Chloroform-*d*)

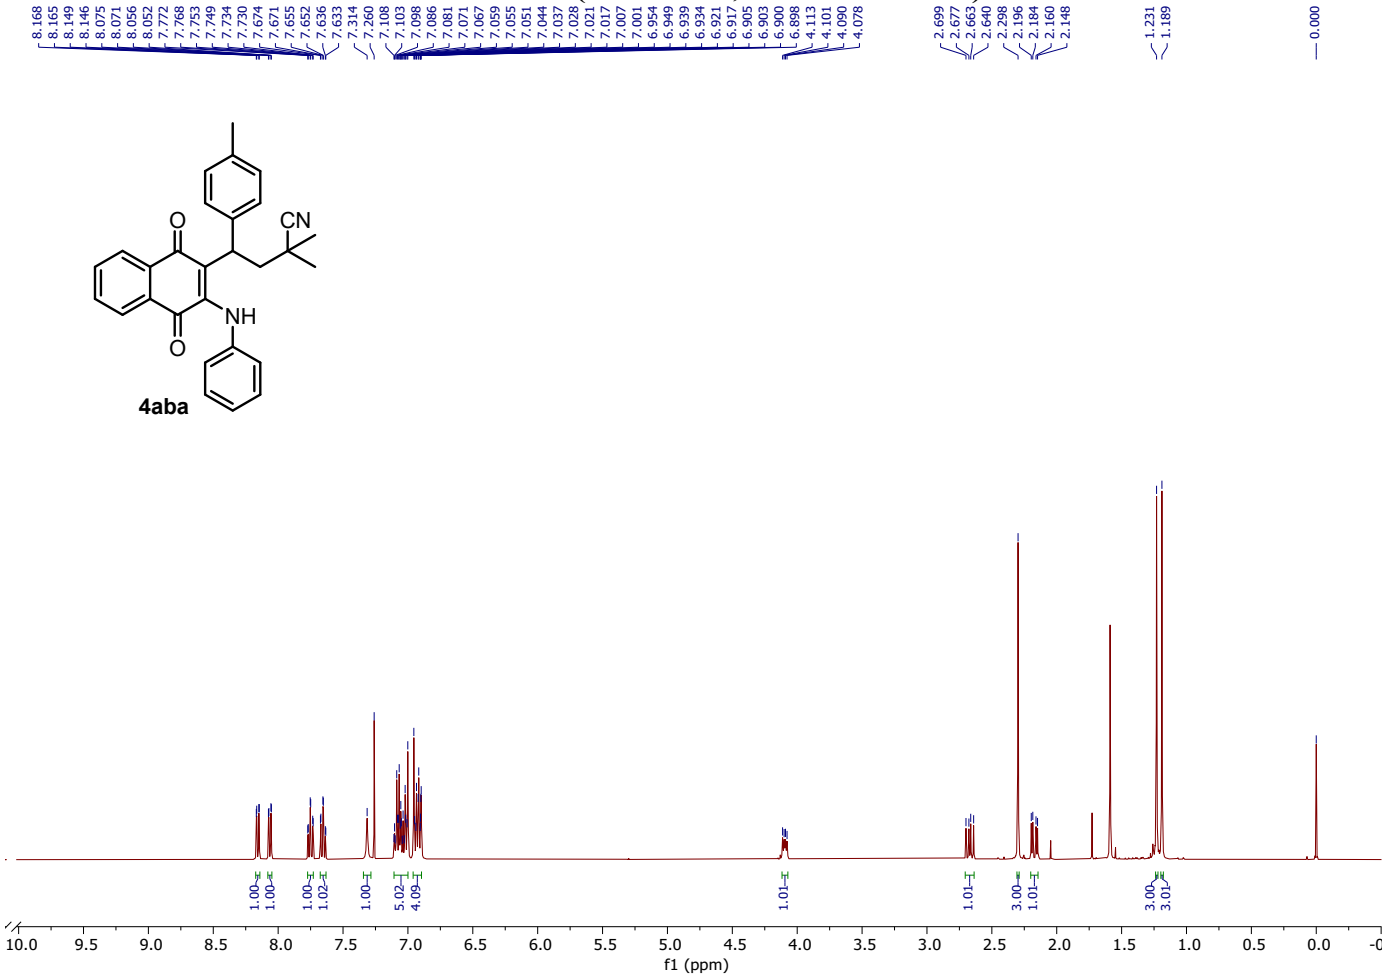

# <sup>13</sup>C-NMR (100 MHz, Chloroform-*d*)

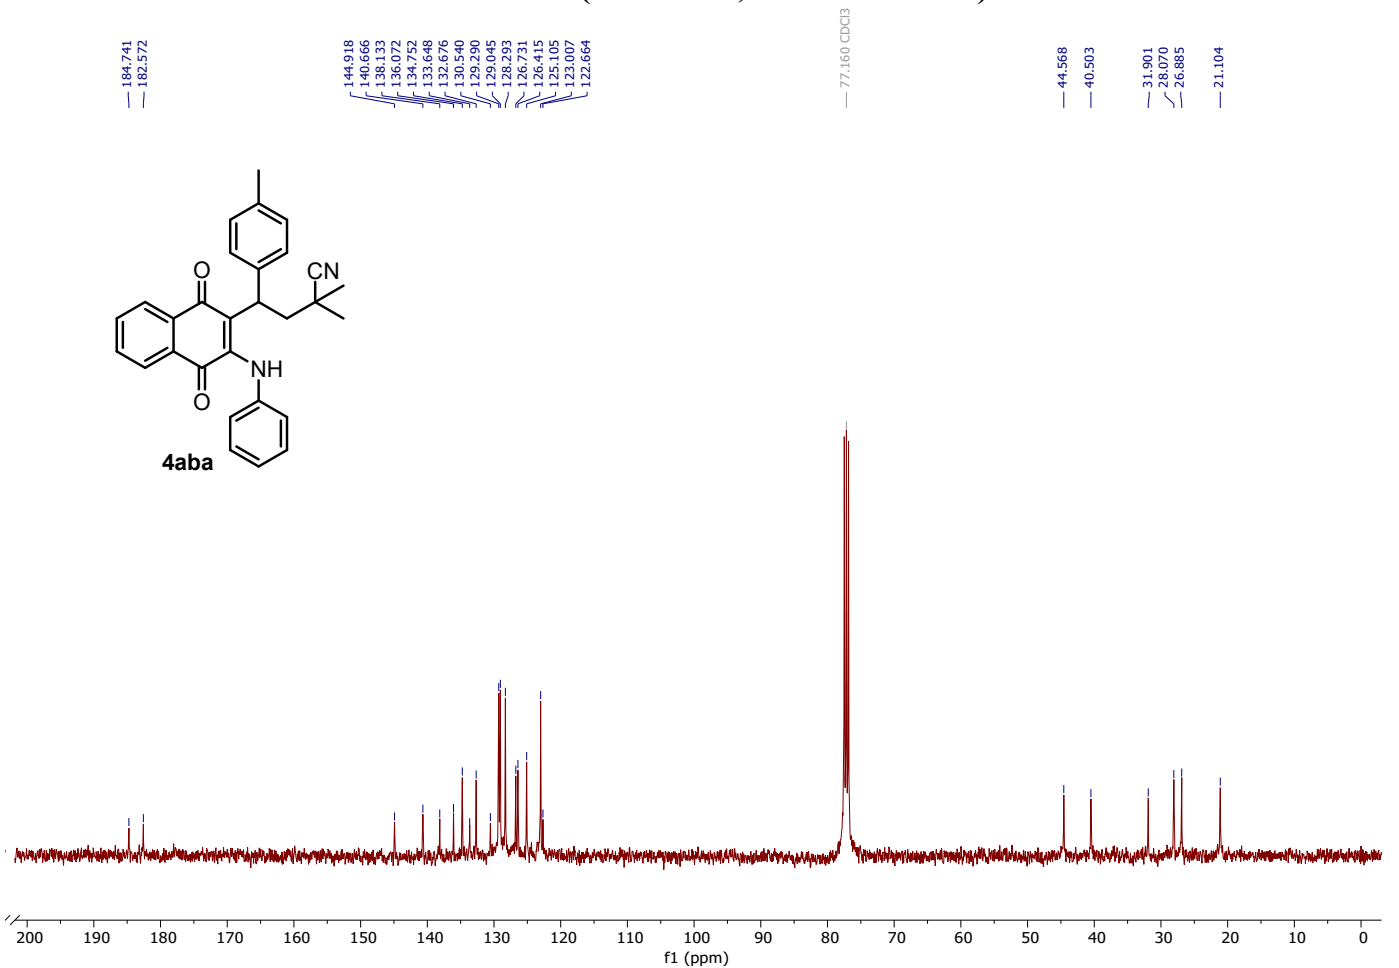

# <sup>1</sup>H-NMR (400 MHz, Chloroform-*d*)

8.233, 8.229, 8.213, 8.210, 8.085, 8.082, 8.066, 8.063, 7.797, 7.778, 7.774, 7.759, 7.755, 7.686, 7.683, 7.667, 7.664, 7.648, 7.645, 7.435, 7.430, 7.416, 7.412, 7.405, 7.262, 7.170, 7.166, 7.152, 7.147, 7.137, 7.127, 7.113, 7.109, 7.095, 7.091, 7.009, 7.006, 6.995, 6.991, 6.988, 6.984, 6.977, 6.969, 6.953, 6.951, 6.947, 6.744, 6.741, 6.736, 6.734, 6.728, 6.726, 6.720, 6.718, 6.710, 6.237, 4.317, 4.301, 4.191, 4.073, 2.823, 2.827, 2.826, 2.820, 1.828, 1.828, 1.641, 1.631, 1.628, 1.315, 1.212, 0.000

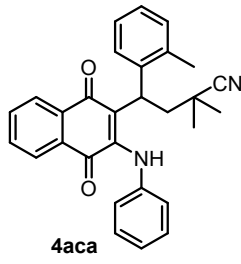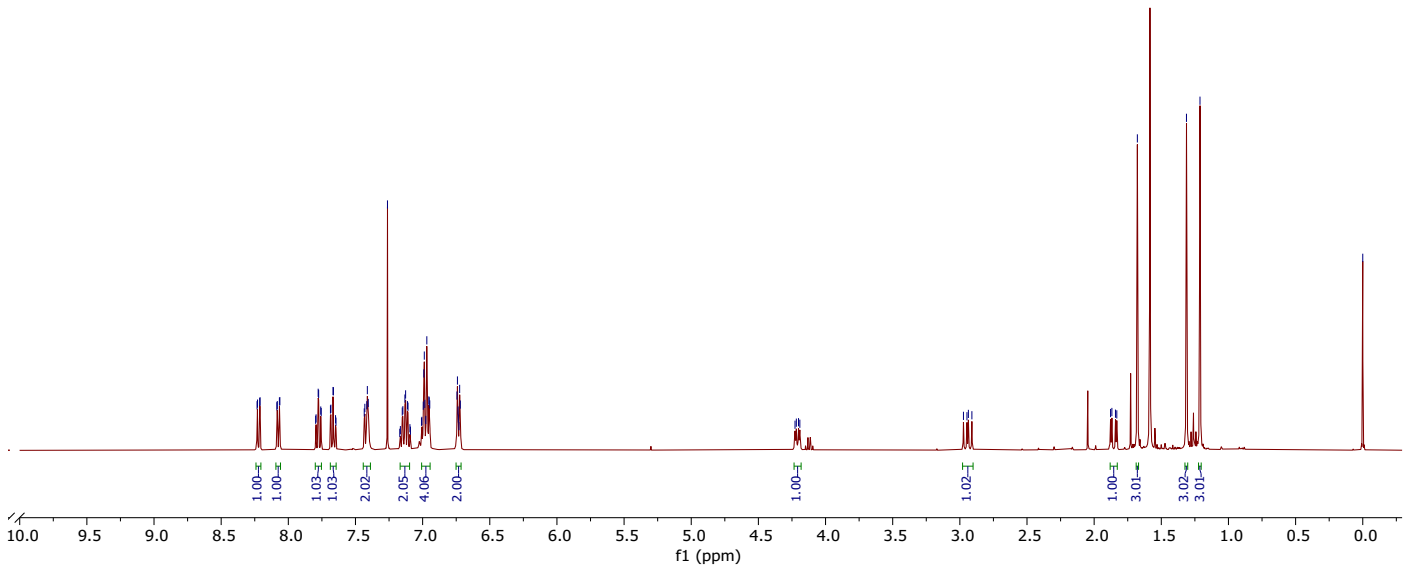

# <sup>13</sup>C-NMR (100 MHz, Chloroform-*d*)

185.465, 182.535, 149.548, 145.236, 143.205, 140.361, 138.995, 137.196, 134.854, 132.704, 130.422, 129.111, 128.555, 126.911, 126.410, 125.087, 124.587, 122.217, 77.160 CDCl<sub>3</sub>, 41.904, 39.290, 31.682, 28.600, 26.680, 19.546

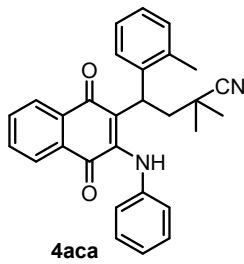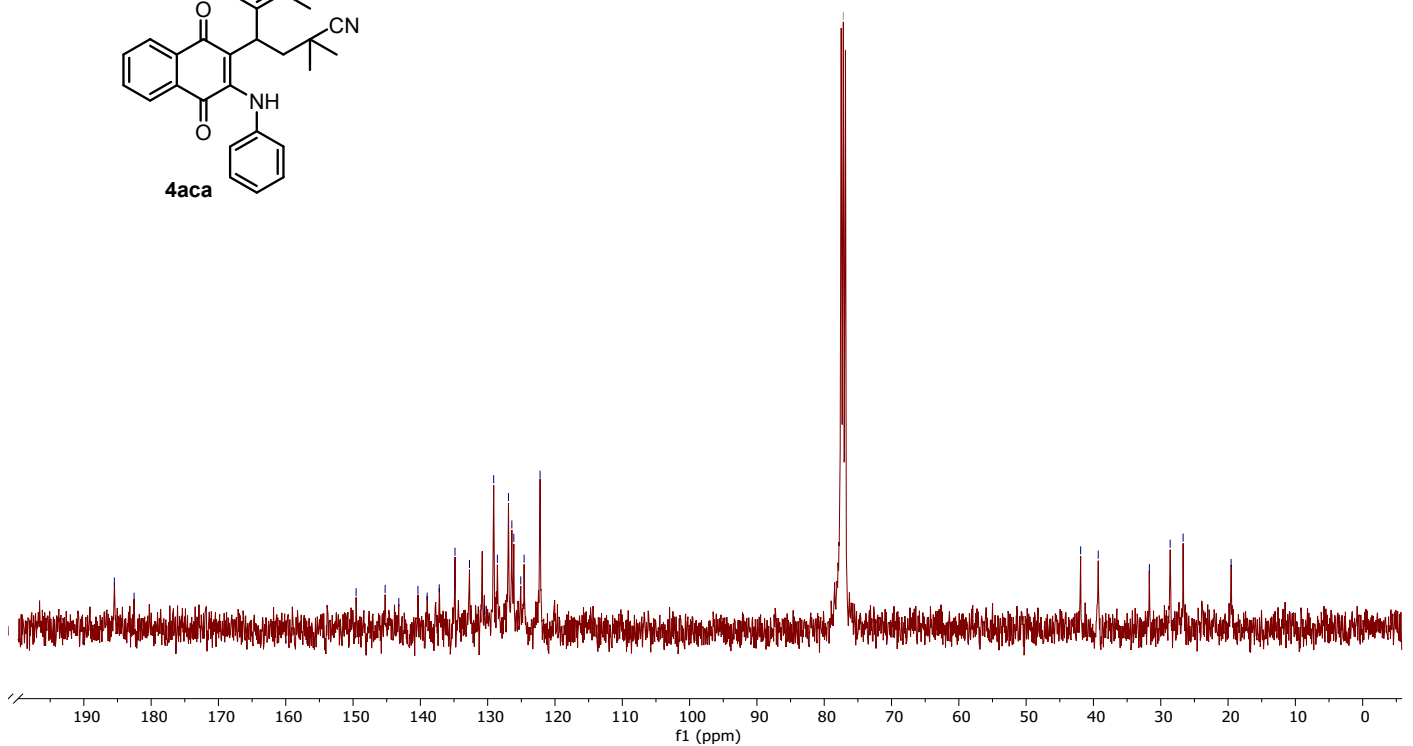





# <sup>1</sup>H-NMR (400 MHz, Chloroform-*d*)

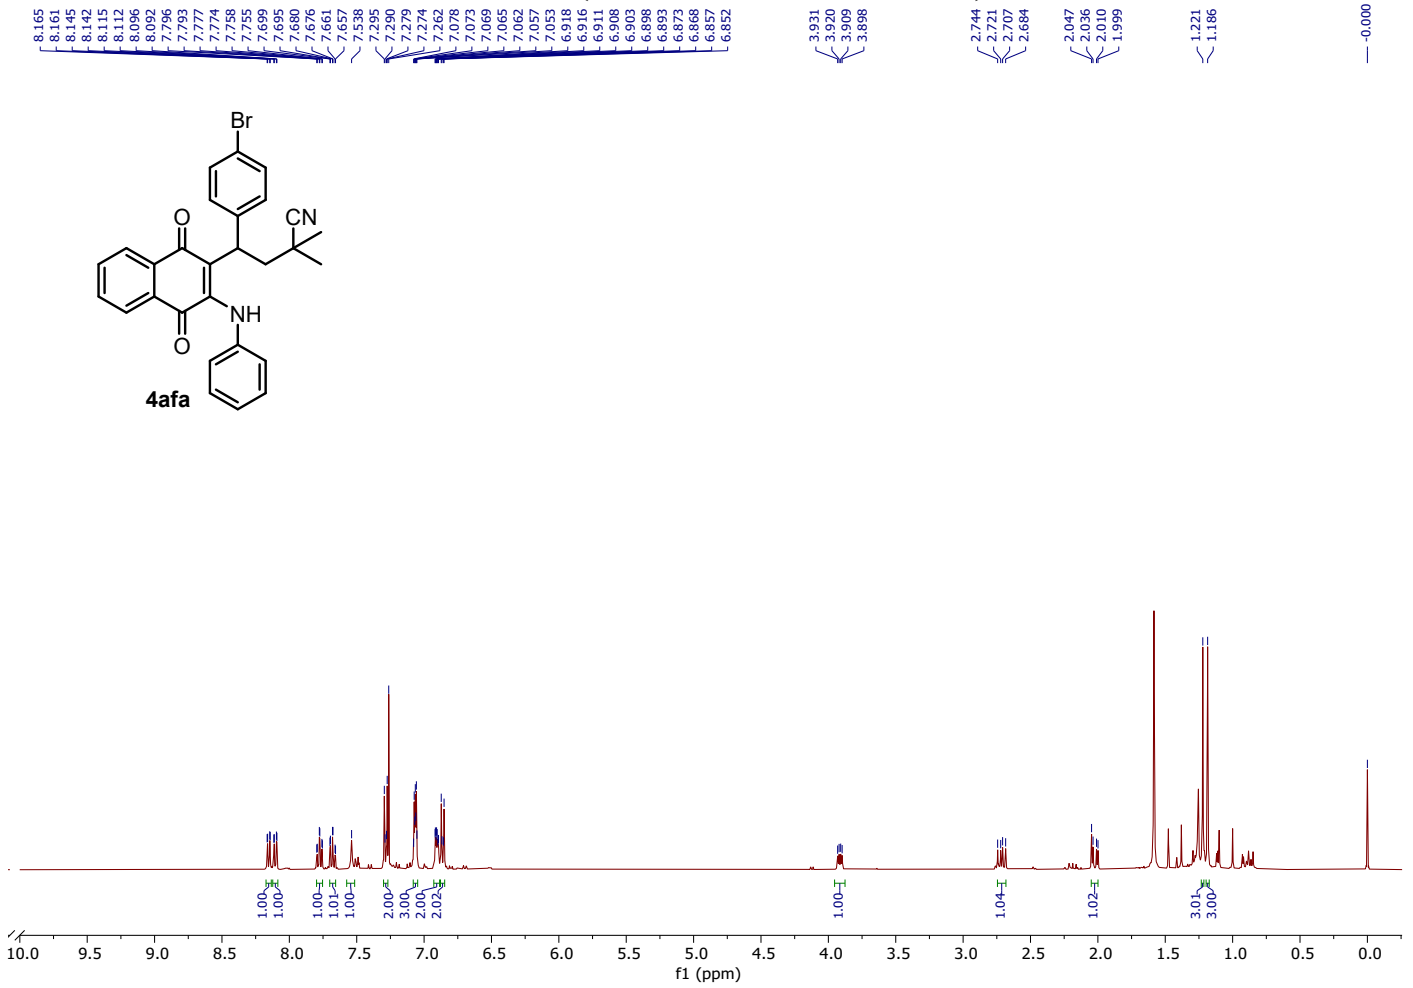

# <sup>13</sup>C-NMR (100 MHz, Chloroform-*d*)

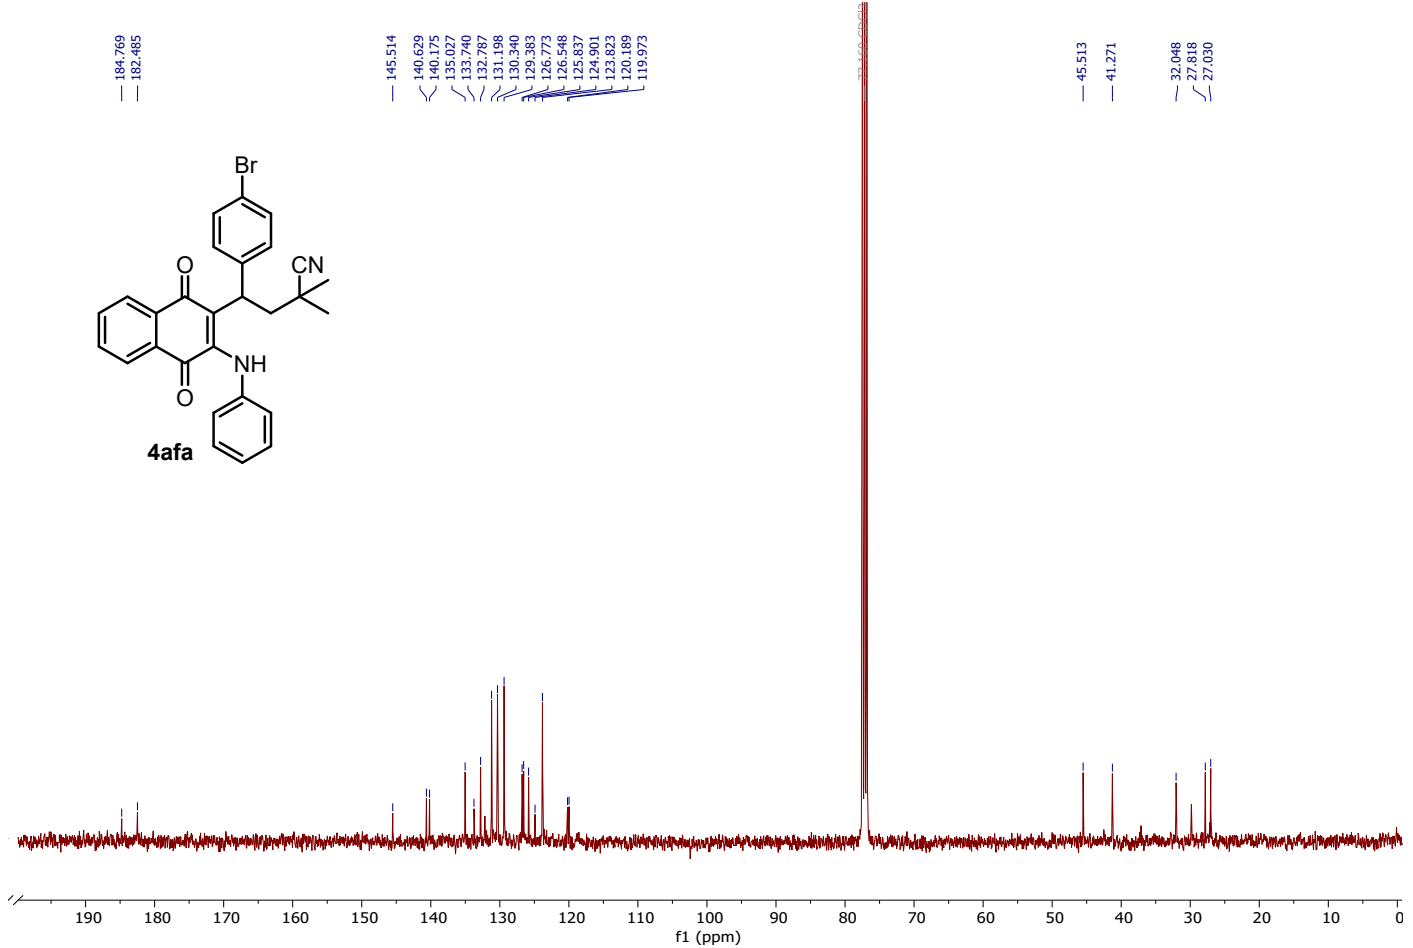

# <sup>1</sup>H-NMR (400 MHz, Chloroform-*d*)

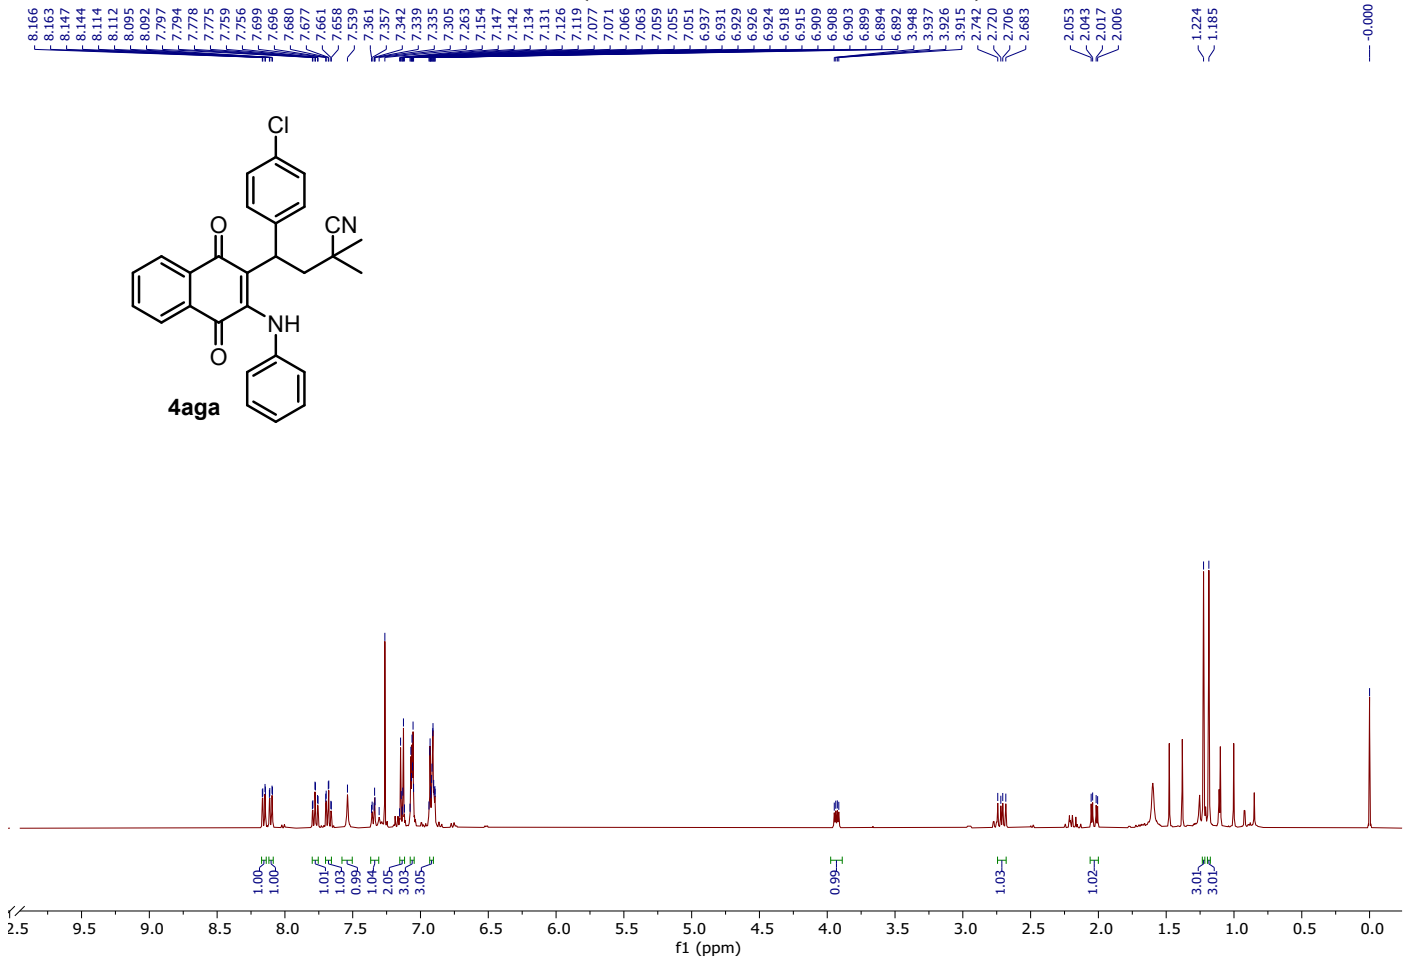

# <sup>13</sup>C-NMR (100 MHz, Chloroform-*d*)

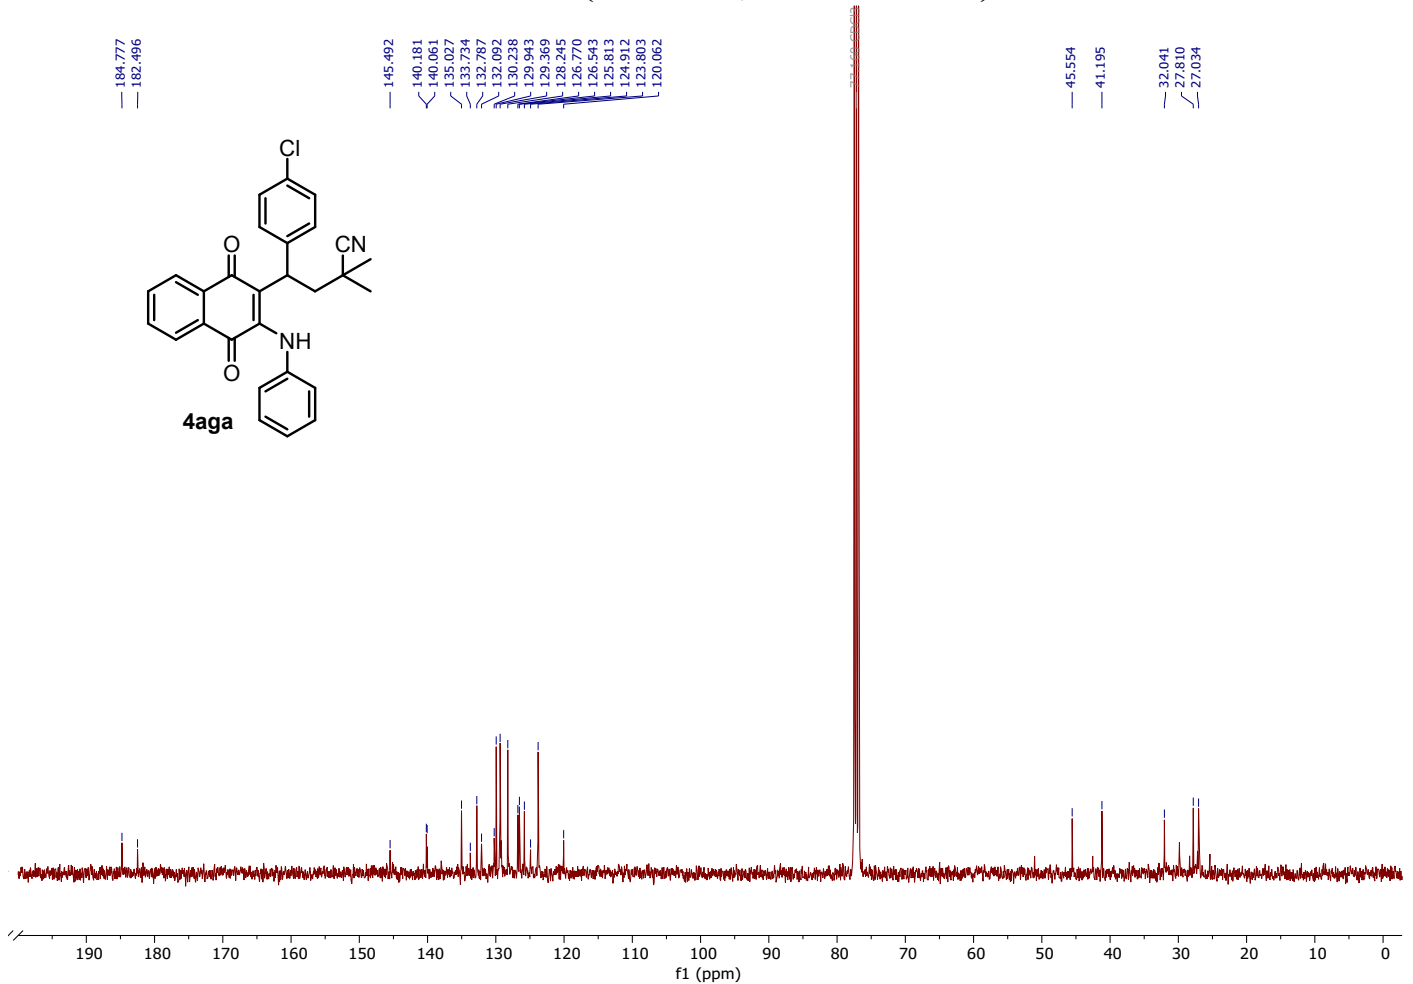

# <sup>1</sup>H-NMR (400 MHz, Chloroform-*d*)

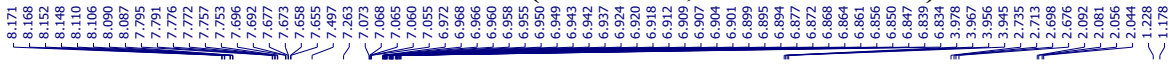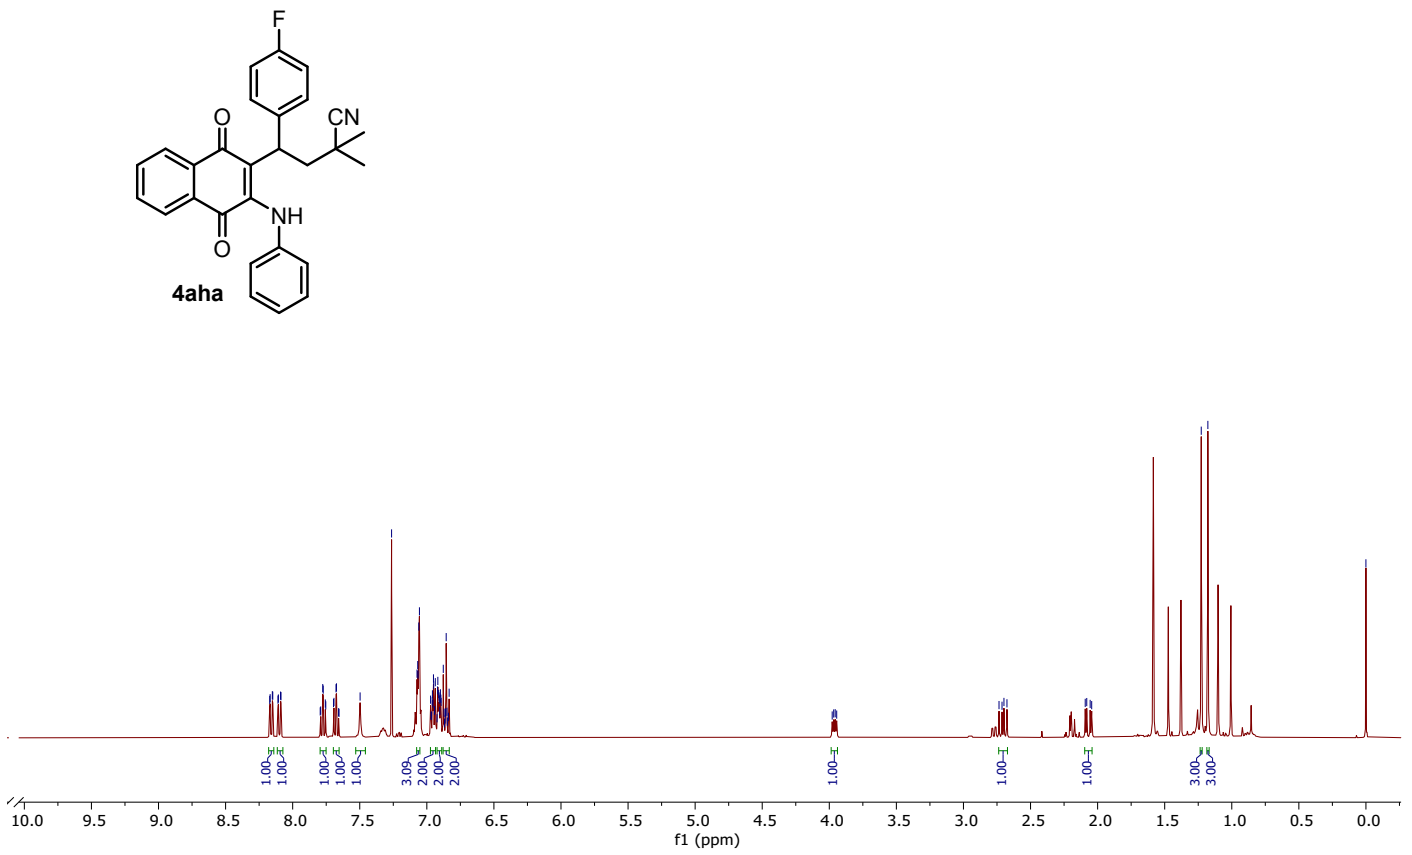

# <sup>13</sup>C-NMR (100 MHz, Chloroform-*d*)

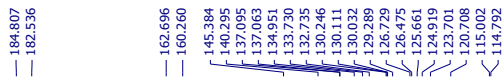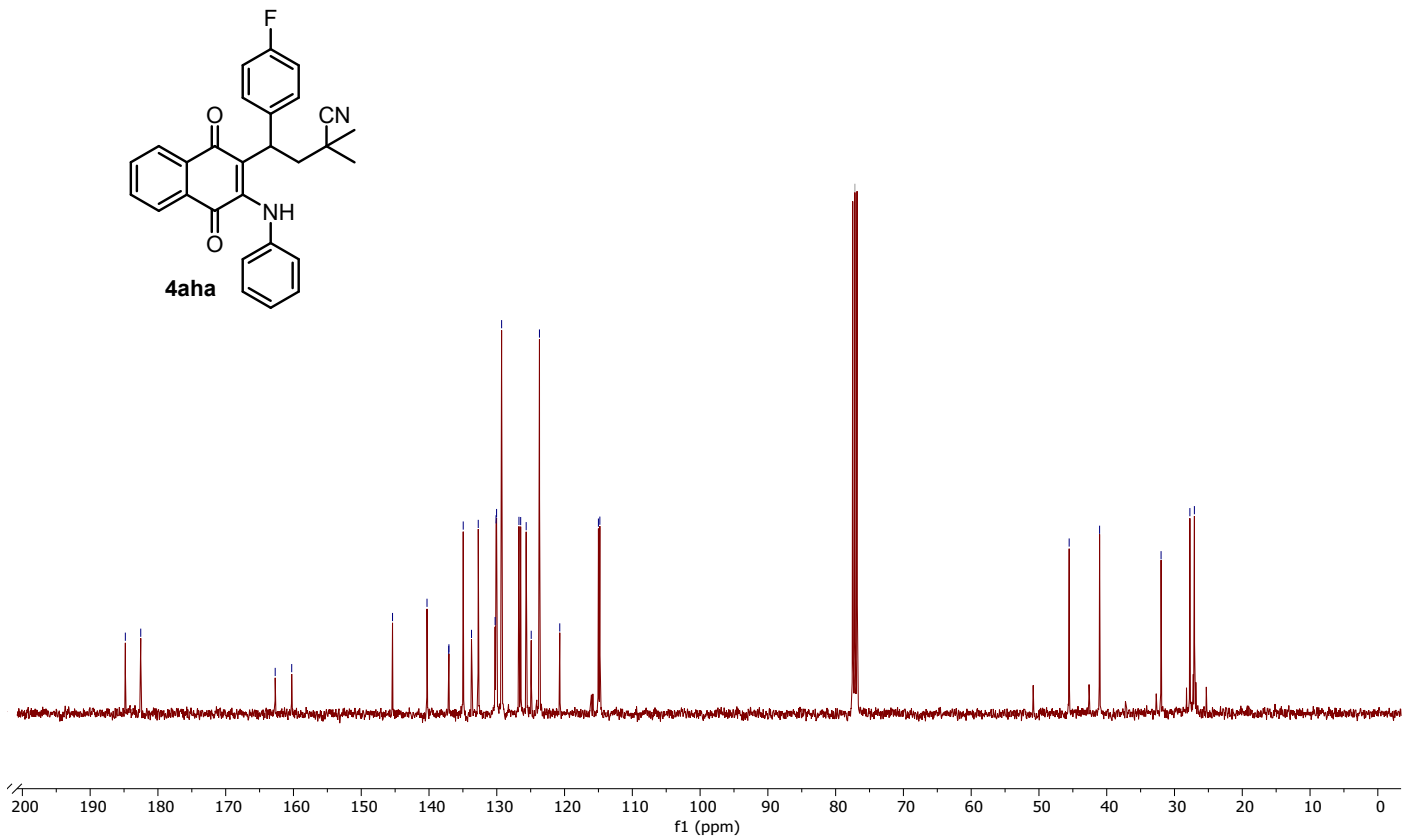



# <sup>1</sup>H-NMR (400 MHz, Chloroform-*d*)

8.217, 8.214, 8.197, 8.194, 8.109, 8.105, 8.090, 8.086, 7.806, 7.803, 7.787, 7.784, 7.780, 7.774, 7.768, 7.764, 7.762, 7.718, 7.710, 7.706, 7.701, 7.698, 7.694, 7.682, 7.679, 7.670, 7.664, 7.660, 7.648, 7.469, 7.445, 7.439, 7.434, 7.431, 7.427, 7.421, 7.261, 7.124, 7.120, 7.103, 7.098, 6.997, 6.995, 6.988, 6.984, 6.980, 6.976, 6.973, 6.966, 6.963, 6.958, 6.948, 6.943, 6.941, 6.936, 6.909, 6.905, 6.900, 6.894, 6.889, 6.884, 4.277, 4.266, 4.254, 4.243, 2.860, 2.837, 2.824, 2.800, 2.234, 2.224, 2.198, 2.187, 1.280, 1.247, 0 ppm

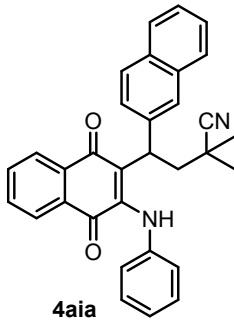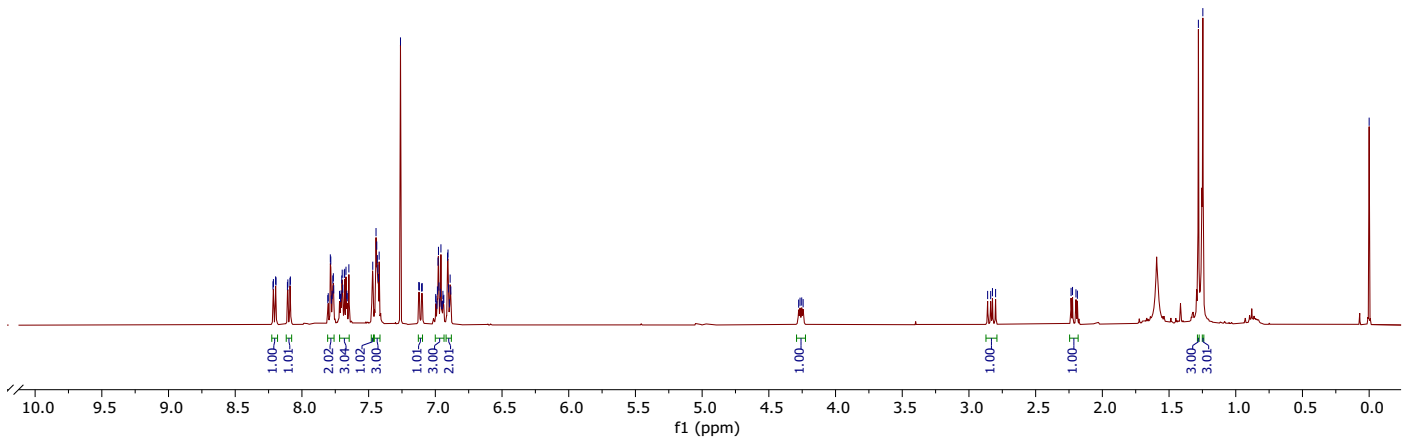

# <sup>13</sup>C-NMR (100 MHz, Chloroform-*d*)

184.874  
182.551

145.389, 140.443, 138.856, 134.878, 133.776, 133.772, 133.339, 132.710, 132.216, 130.501, 129.293, 128.020, 127.943, 127.546, 127.149, 126.827, 126.503, 126.043, 125.720, 125.351, 125.094, 123.382

44.729  
41.369

32.091  
28.145  
26.909

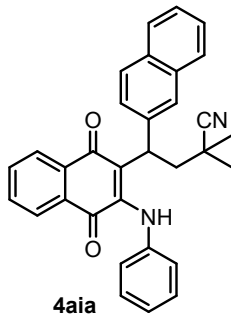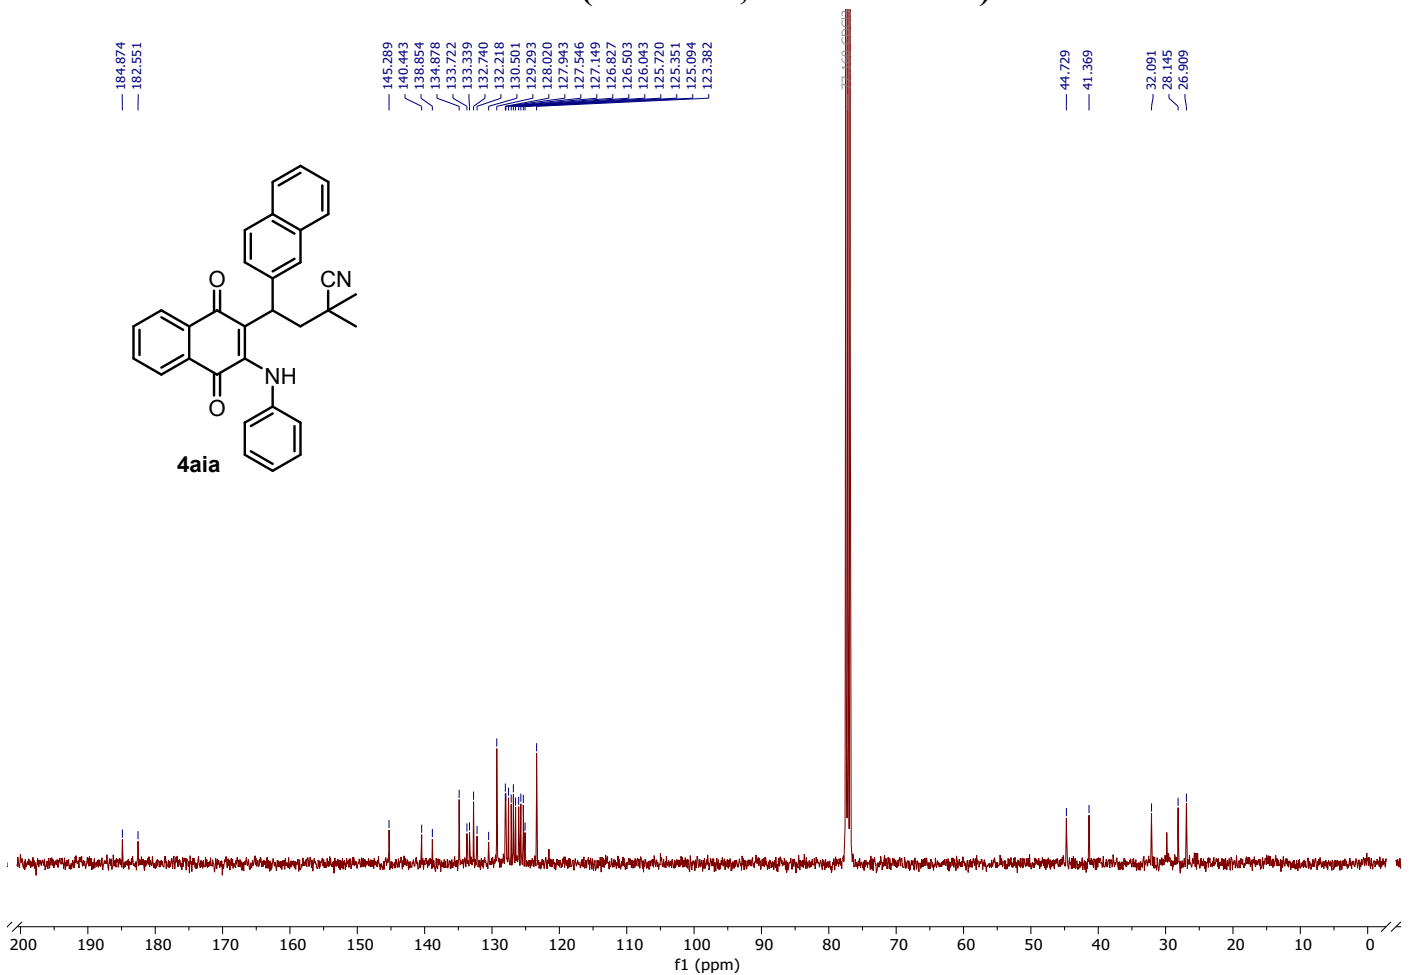

# <sup>1</sup>H-NMR (500 MHz, Chloroform-d)

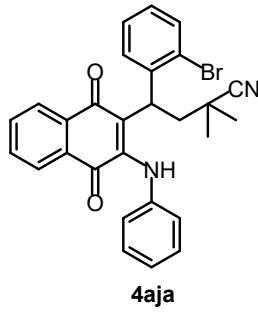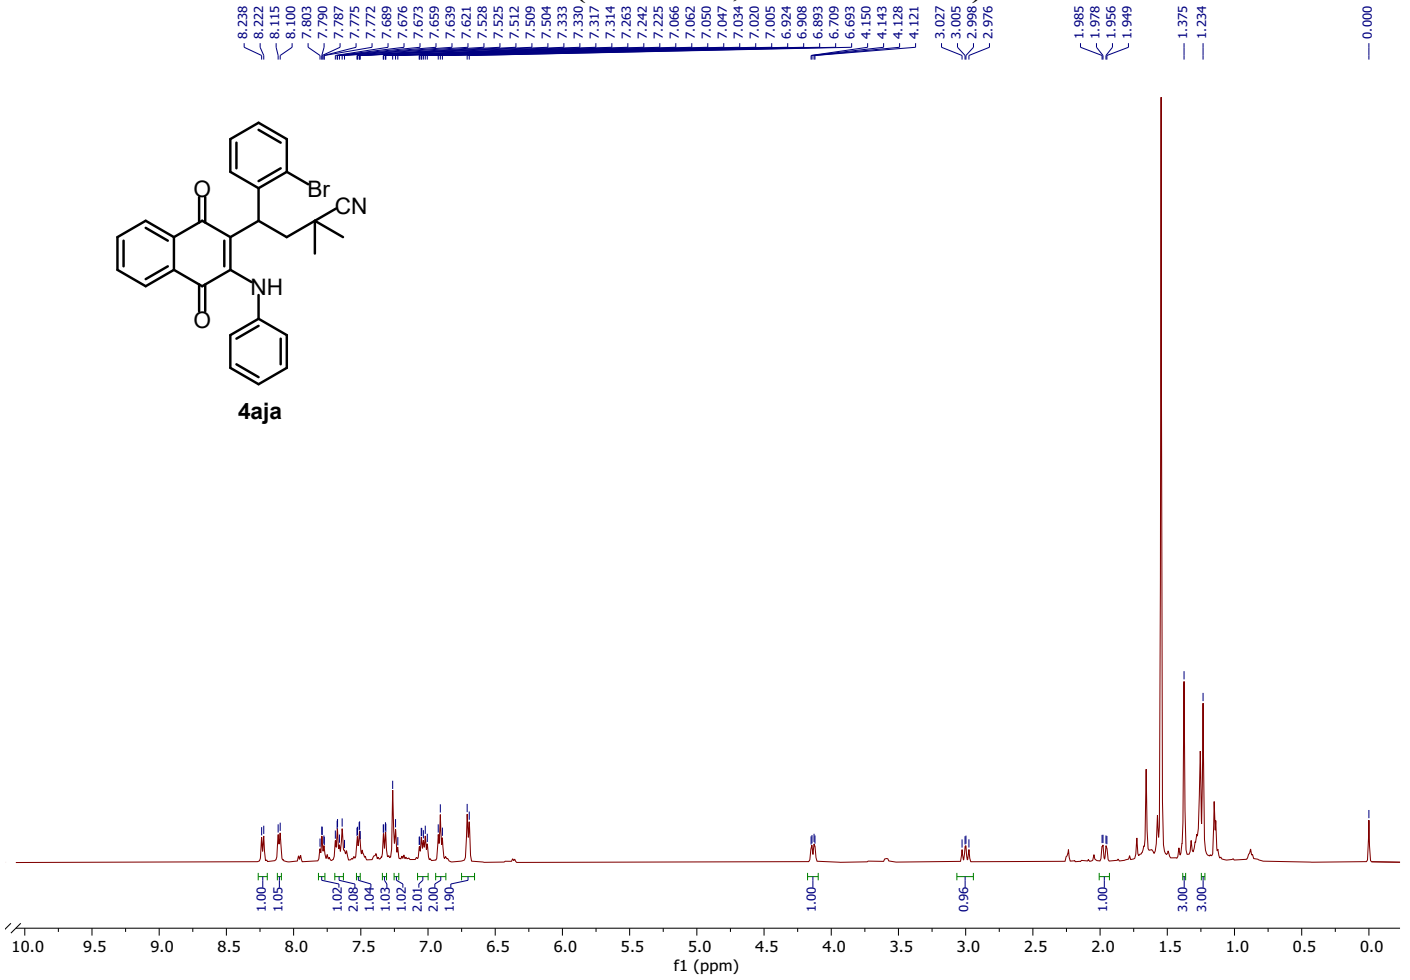

# <sup>13</sup>C-NMR (100 MHz, Chloroform-d)

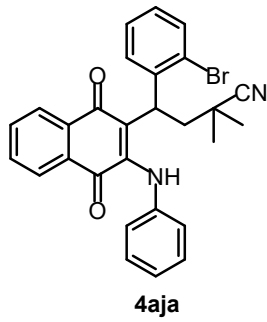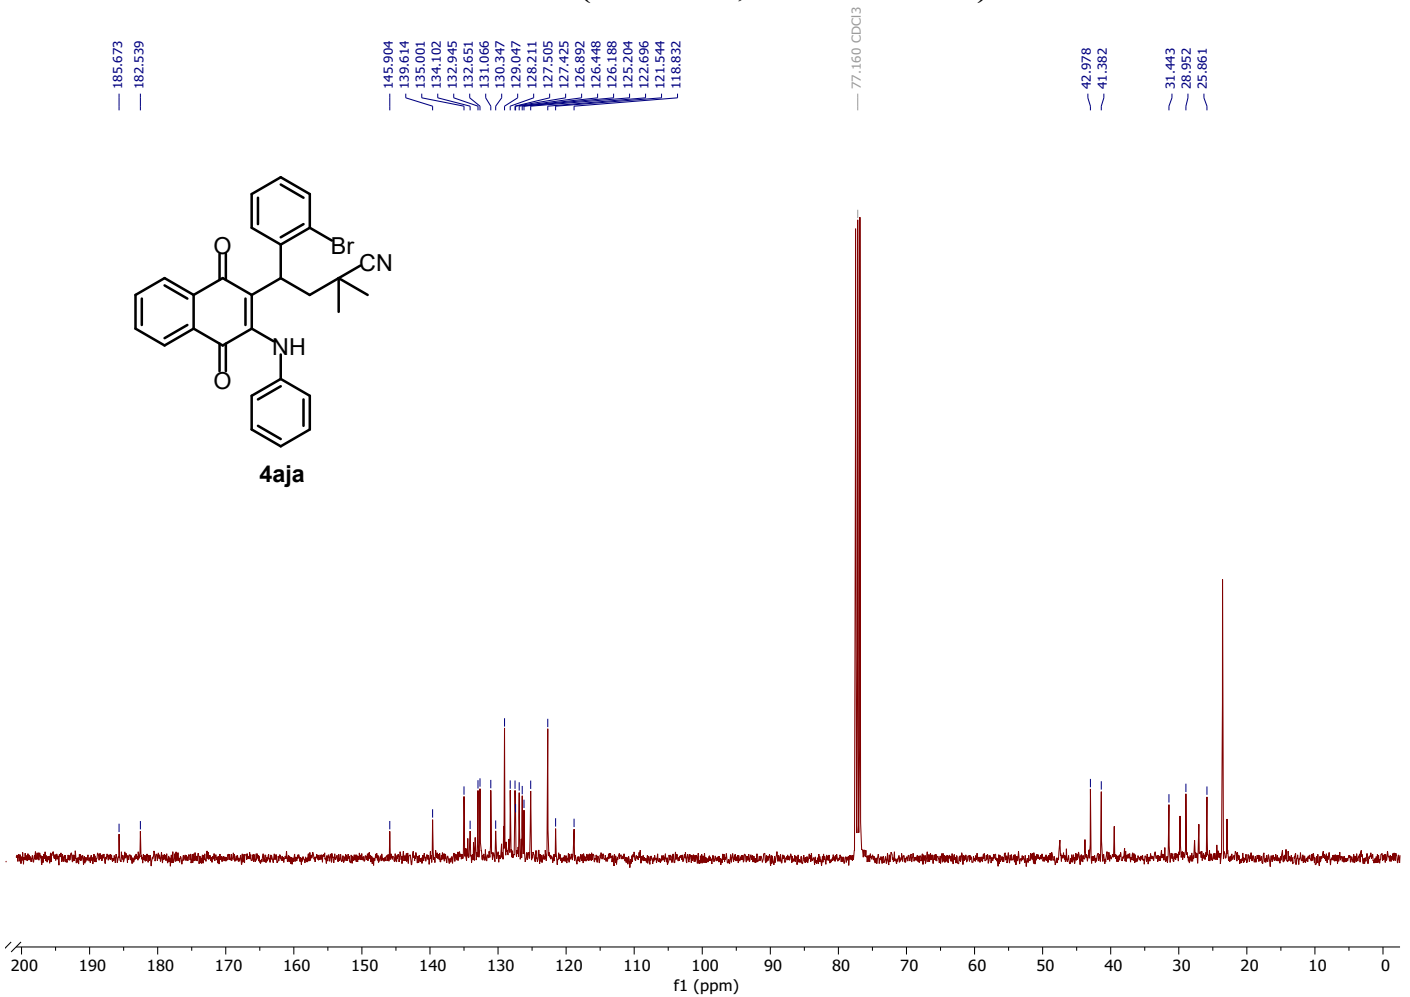

# <sup>1</sup>H-NMR (500 MHz, Chloroform-*d*)

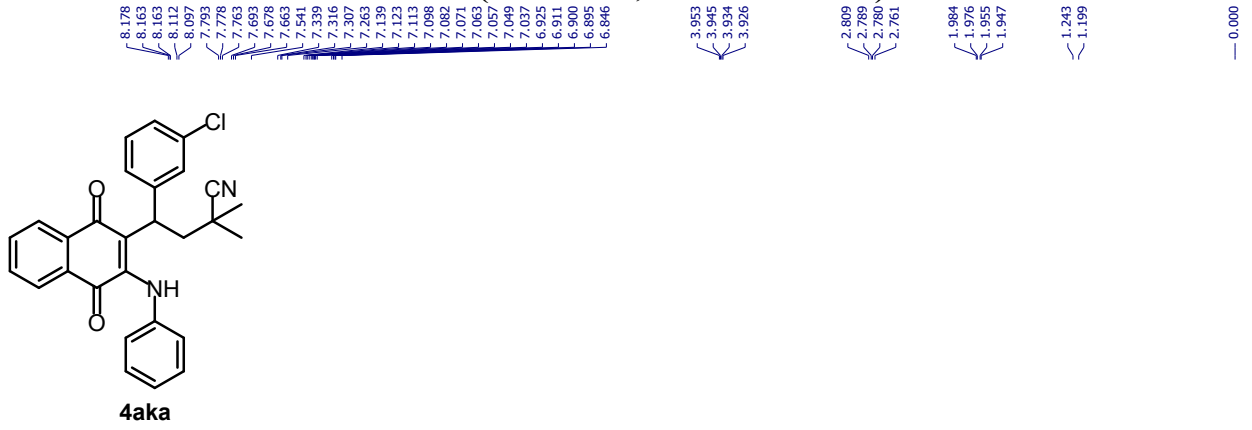

# <sup>13</sup>C-NMR (100 MHz, Chloroform)

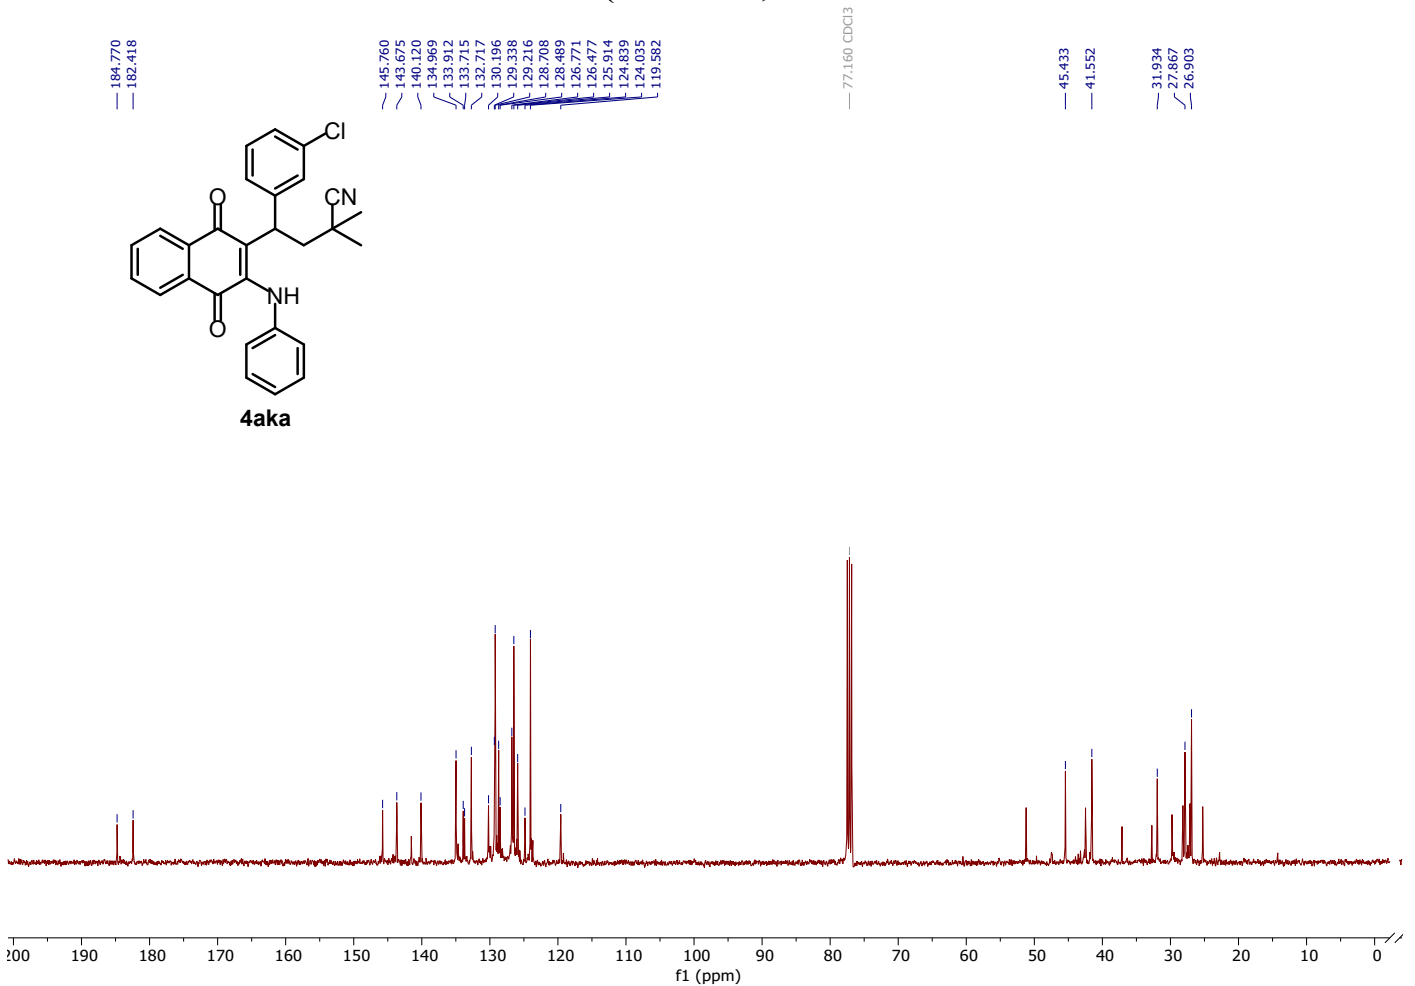

# <sup>1</sup>H-NMR (500 MHz, Chloroform-*d*)

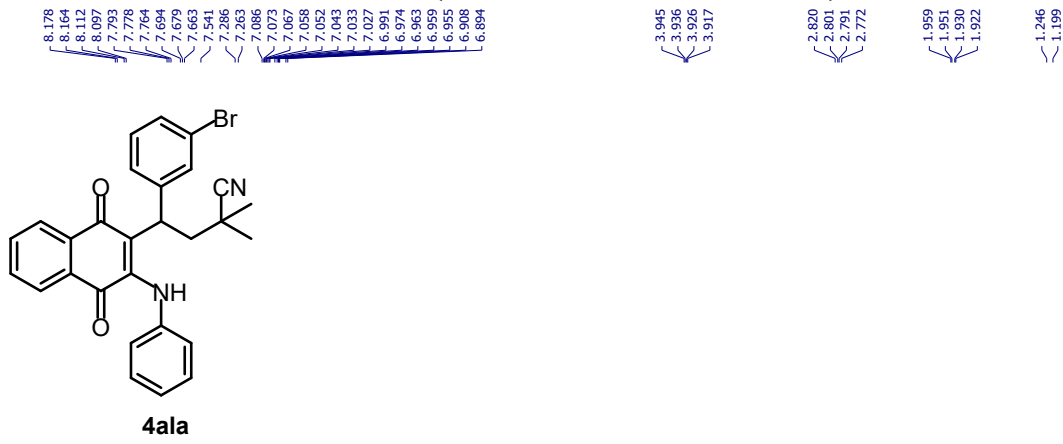

# <sup>13</sup>C-NMR (100 MHz, Chloroform-*d*)

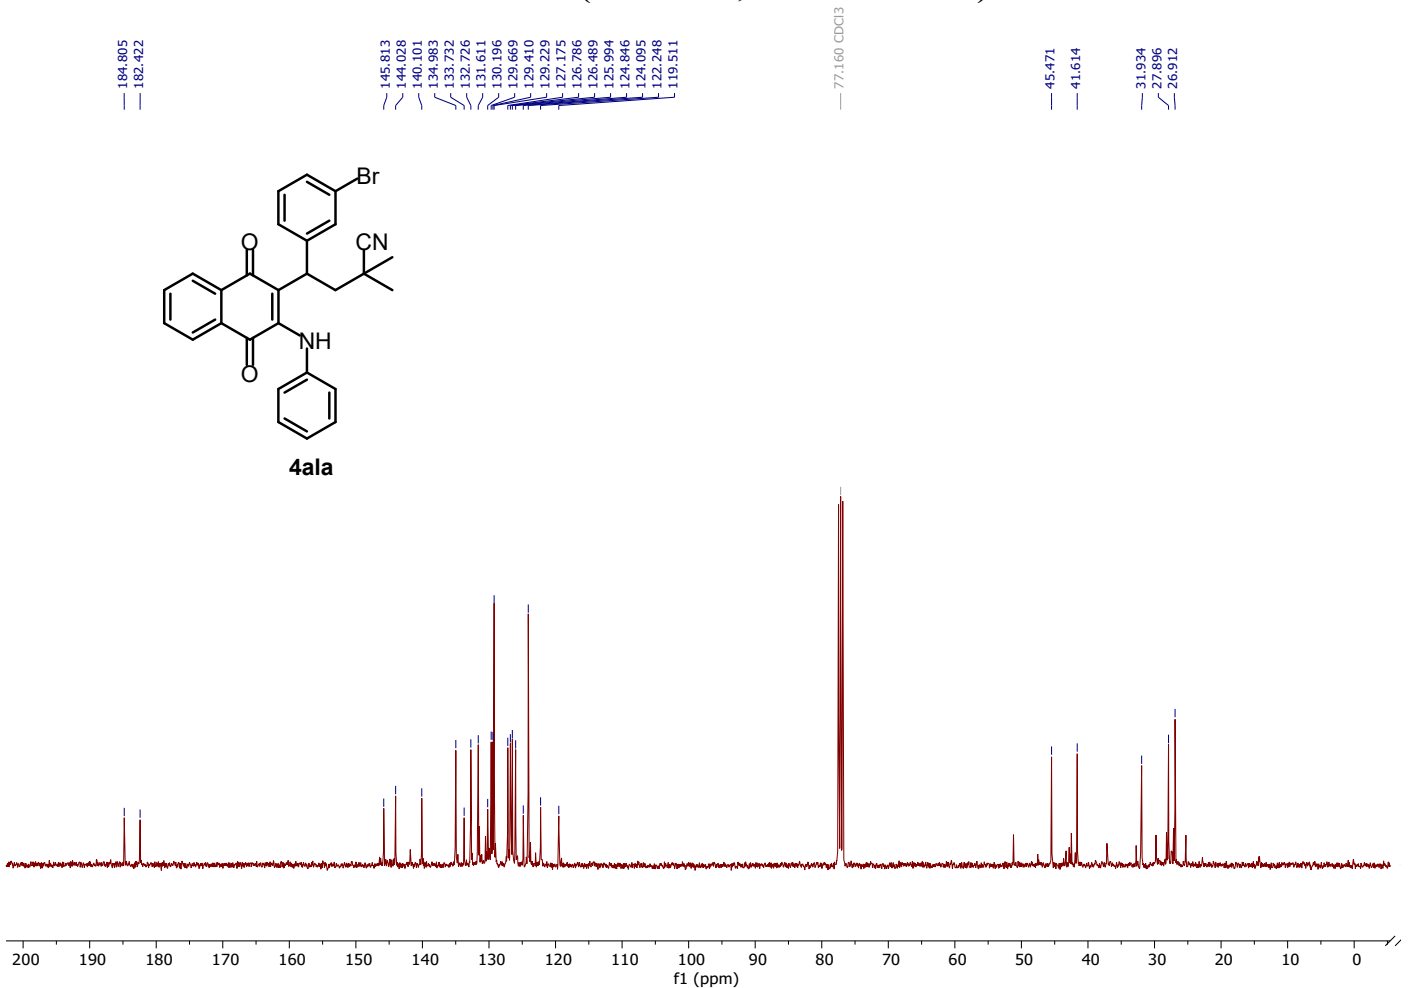

# <sup>1</sup>H-NMR (400 MHz, Chloroform-*d*)

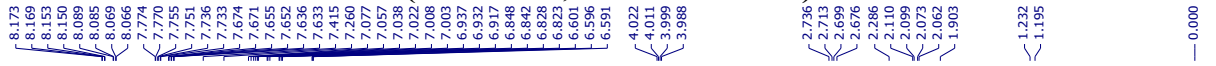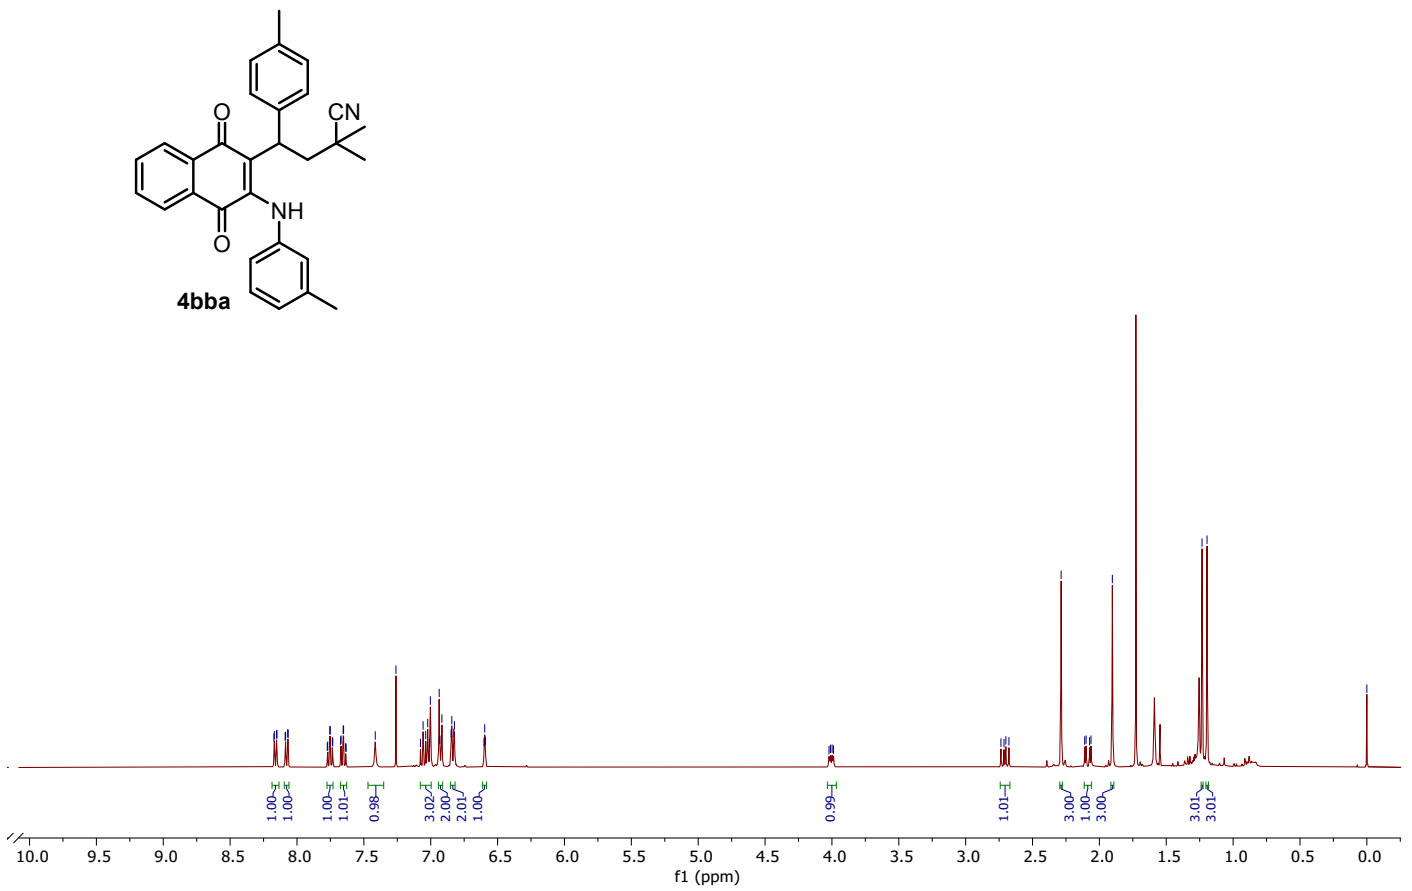

# <sup>13</sup>C-NMR (100 MHz, Chloroform-*d*)

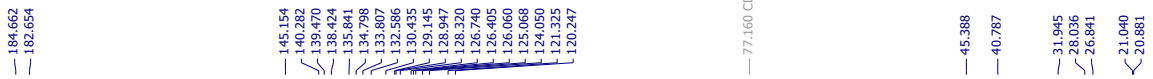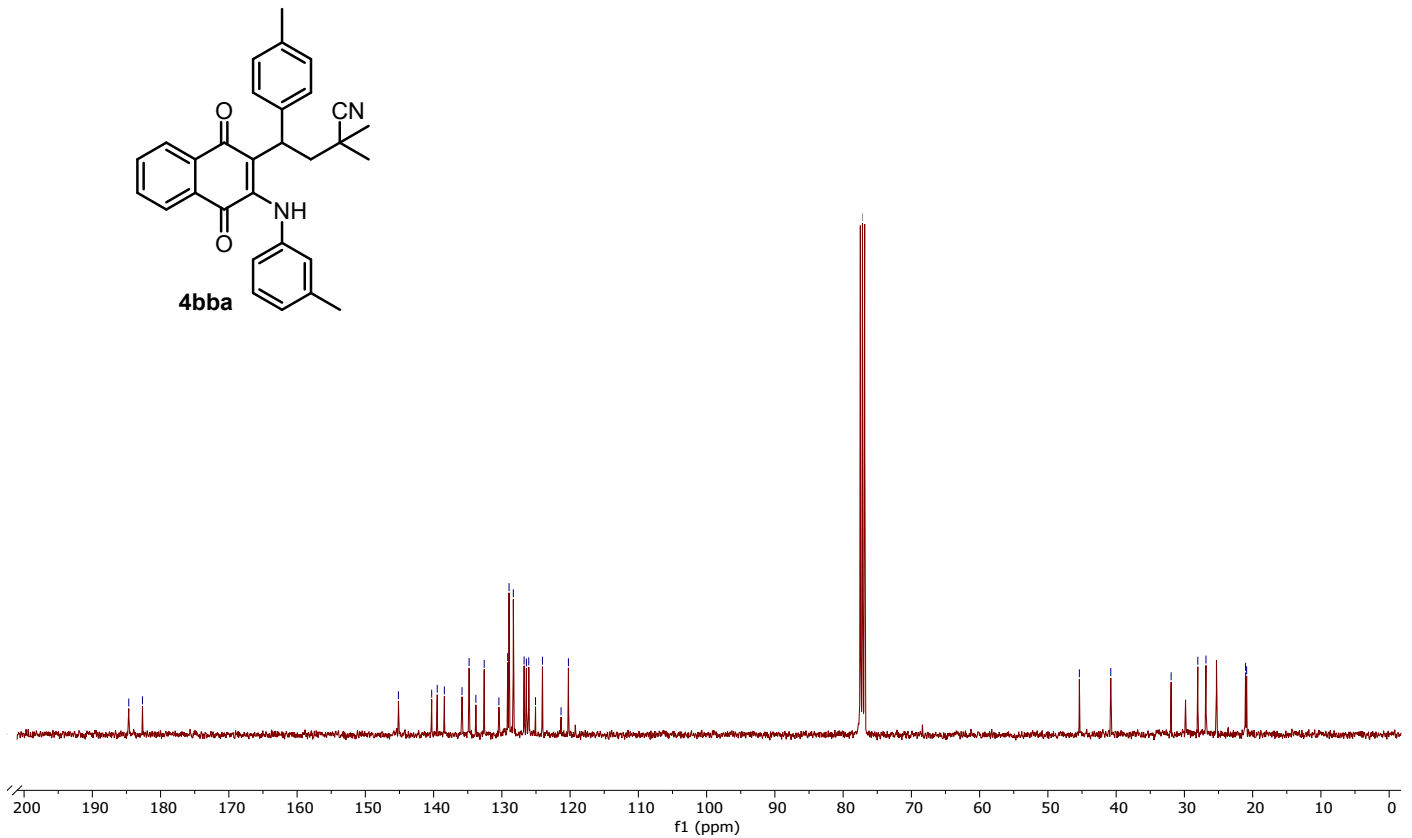

# <sup>1</sup>H-NMR (500 MHz, Chloroform-d)

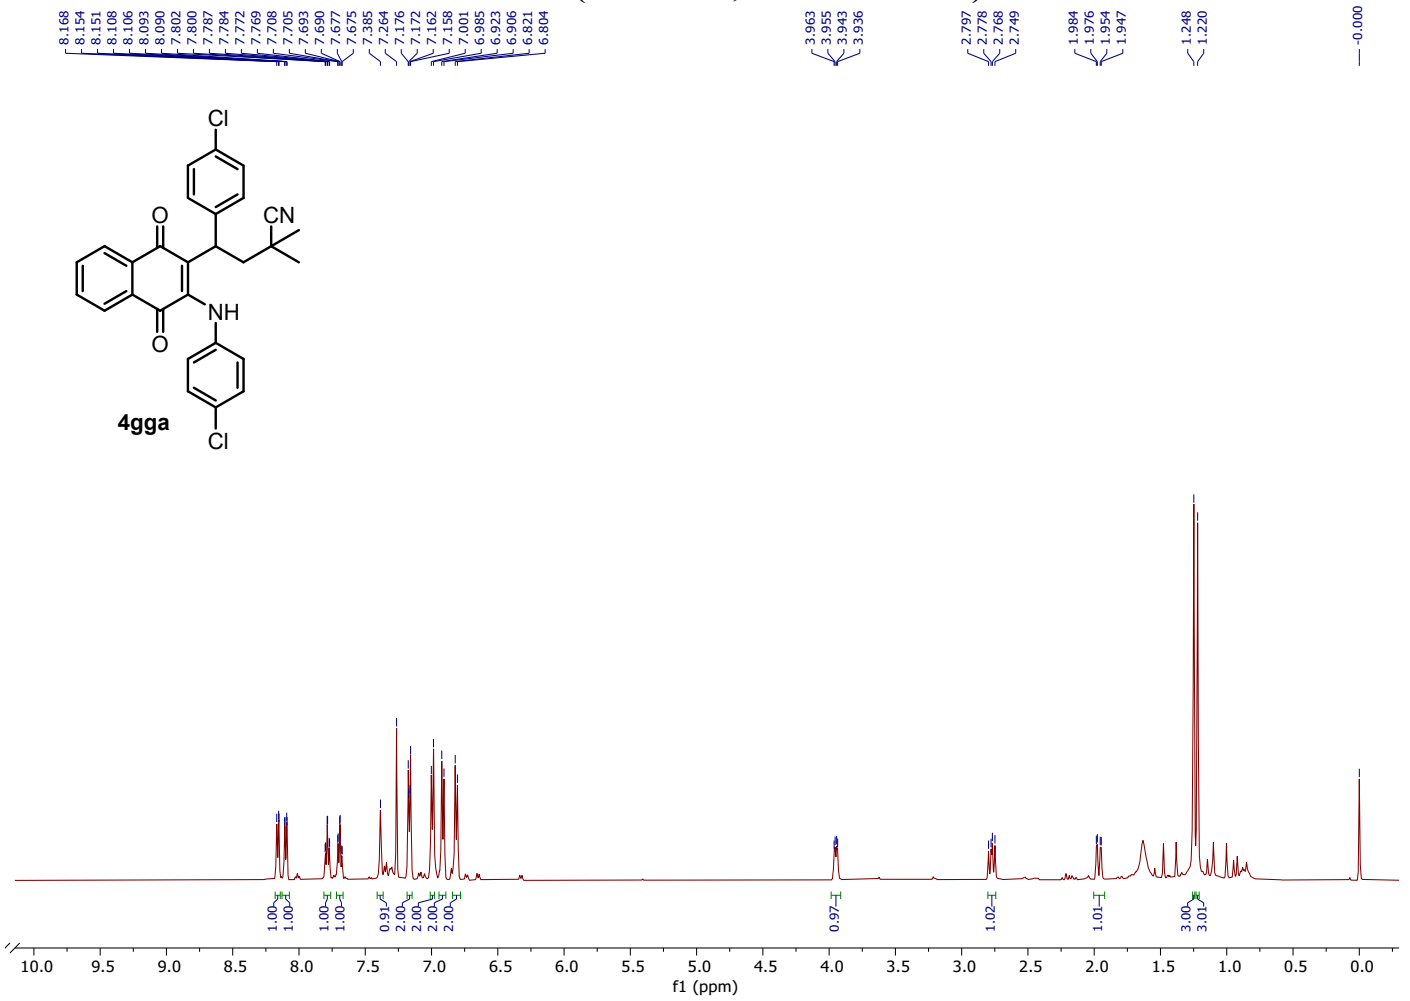

# <sup>13</sup>C-NMR (100 MHz, Chloroform-d)

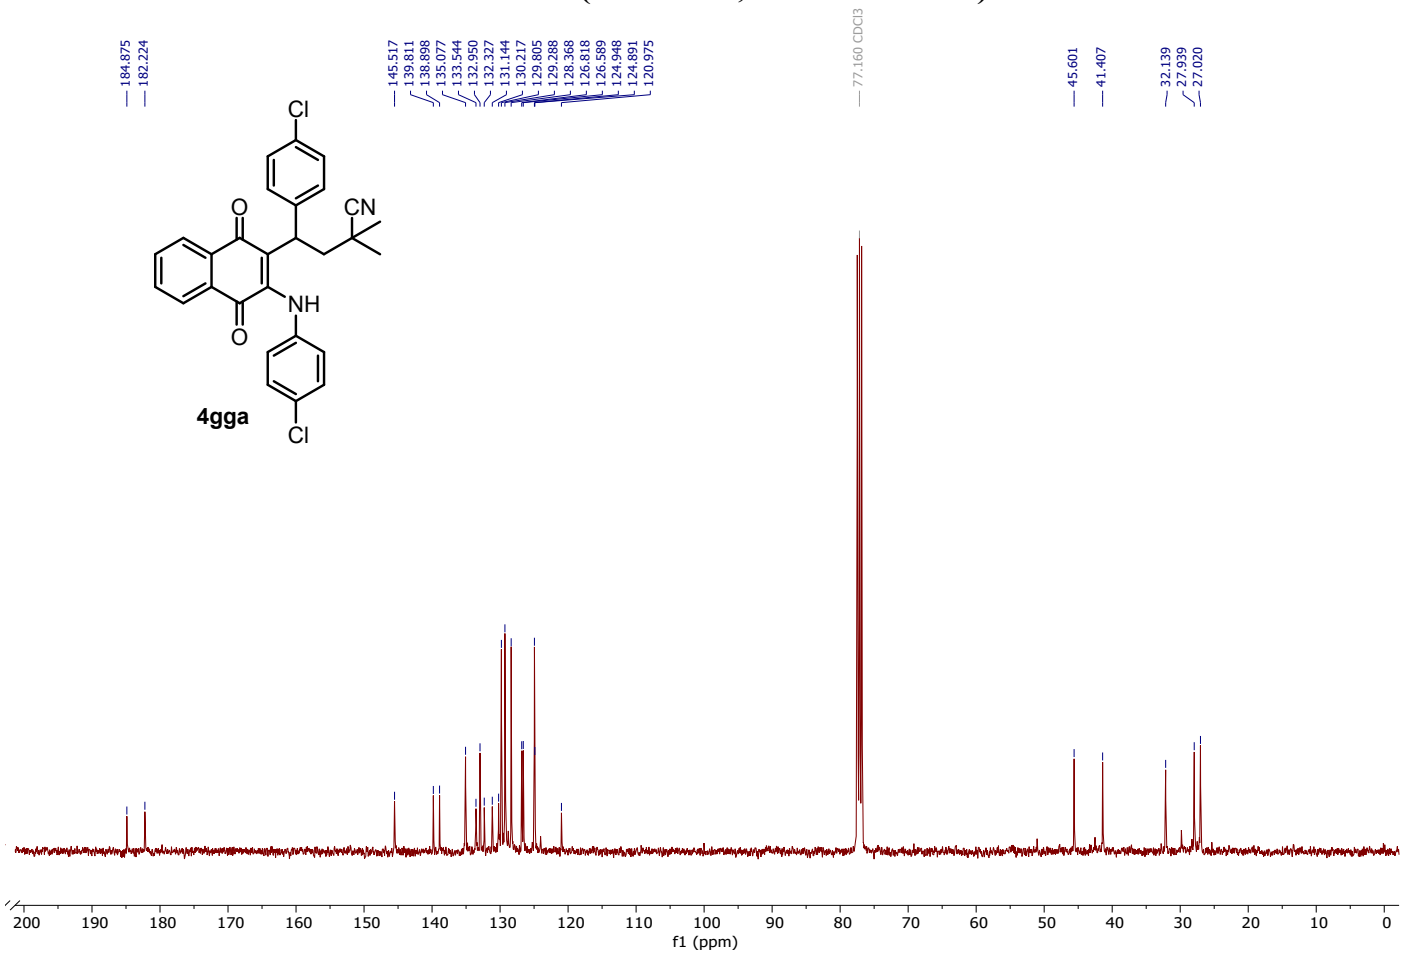

# <sup>1</sup>H-NMR (400 MHz, Chloroform-*d*)

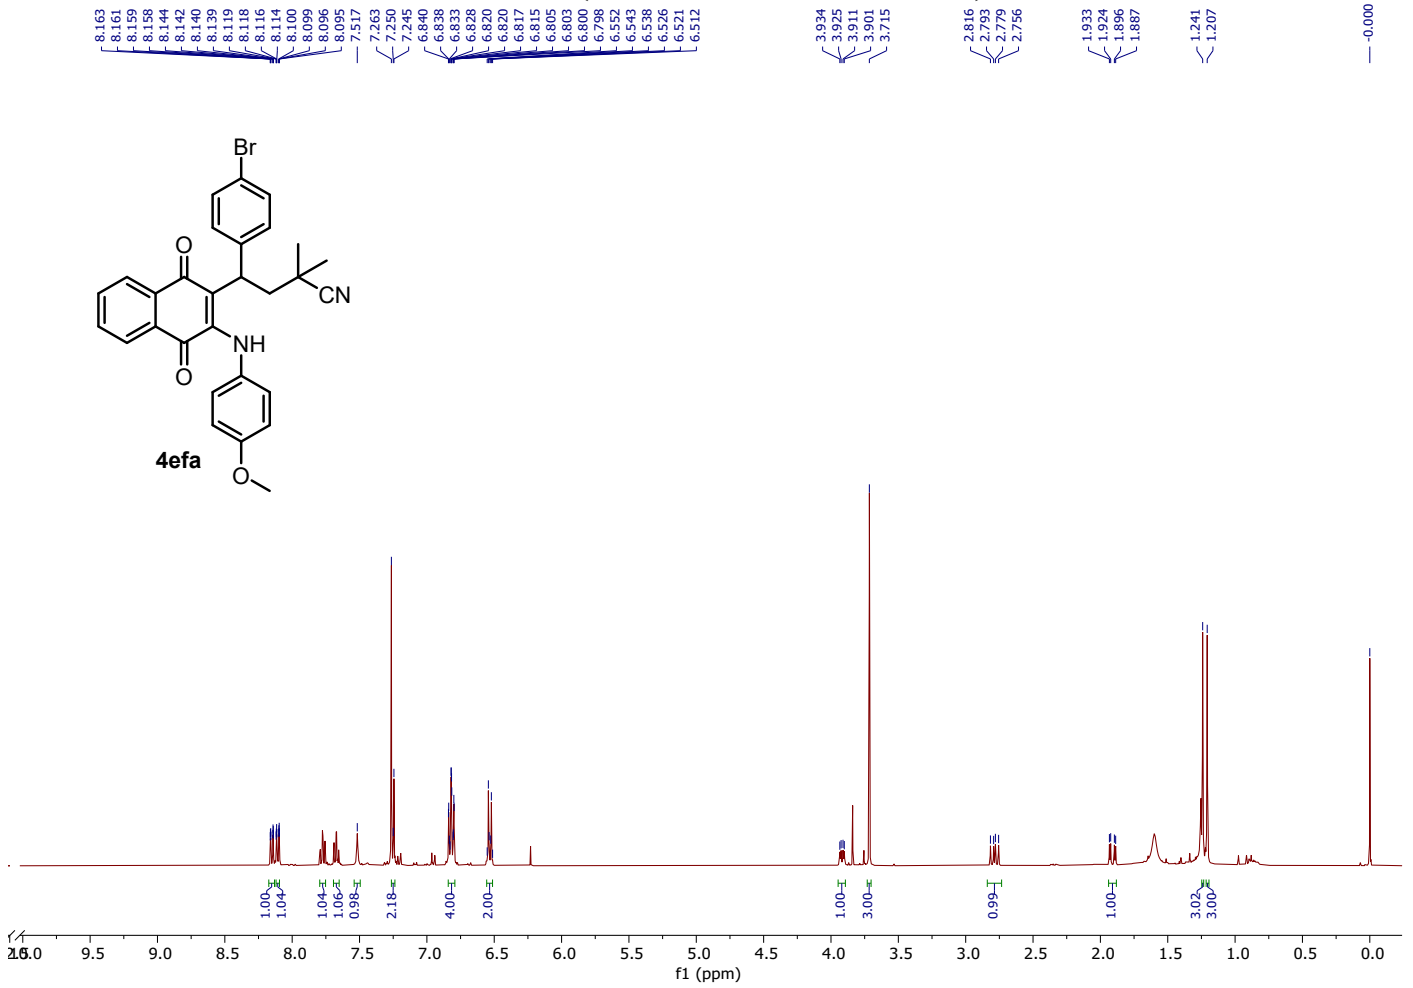

# <sup>13</sup>C-NMR (100 MHz, Chloroform-*d*)

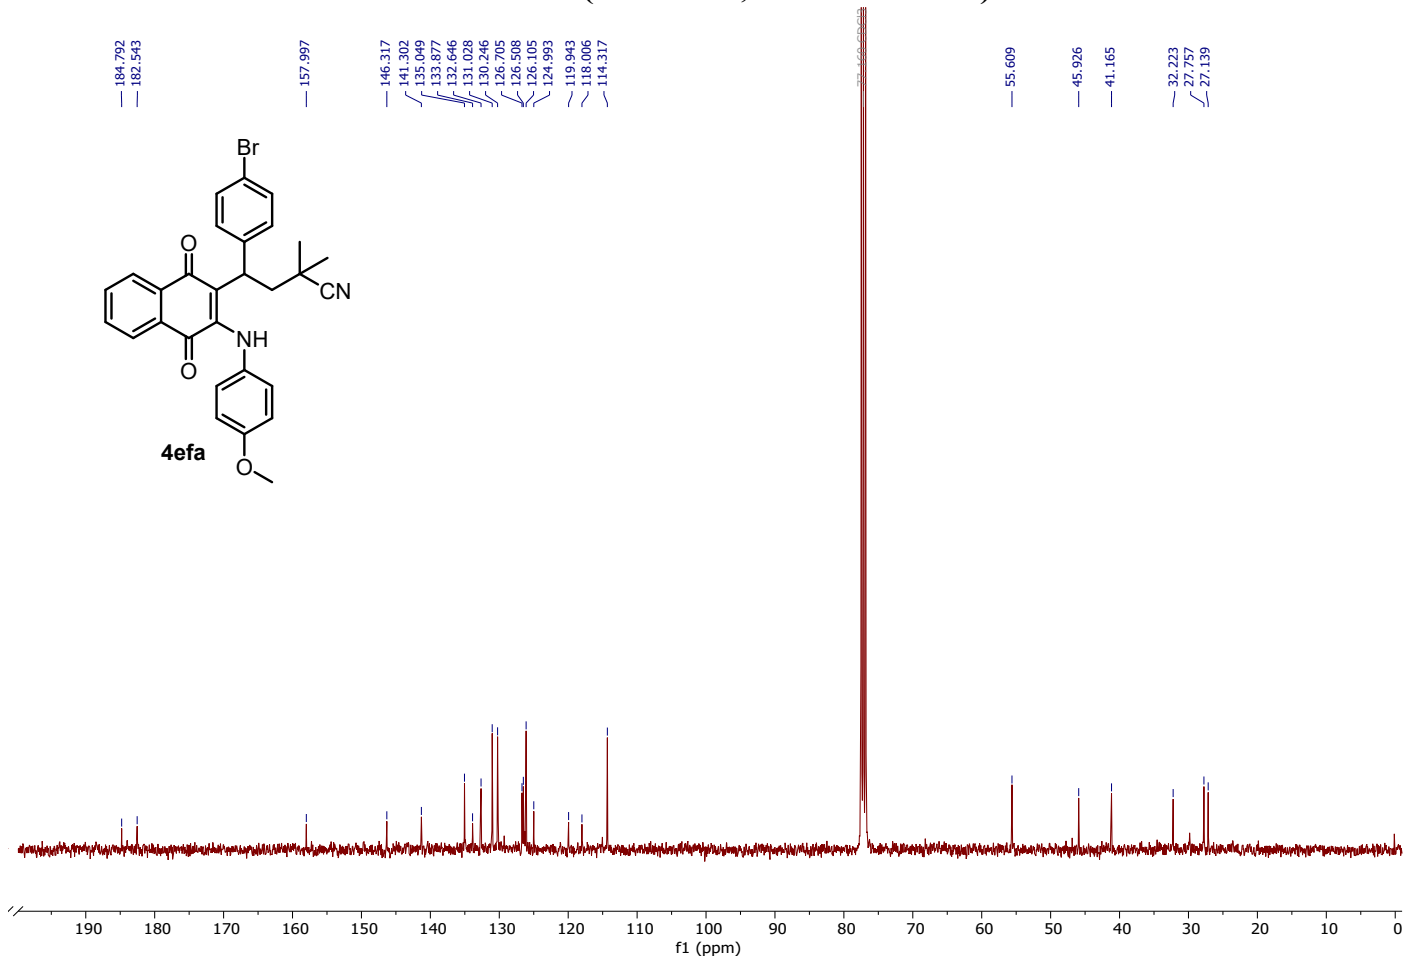

# <sup>1</sup>H-NMR (400 MHz, Chloroform-*d*)

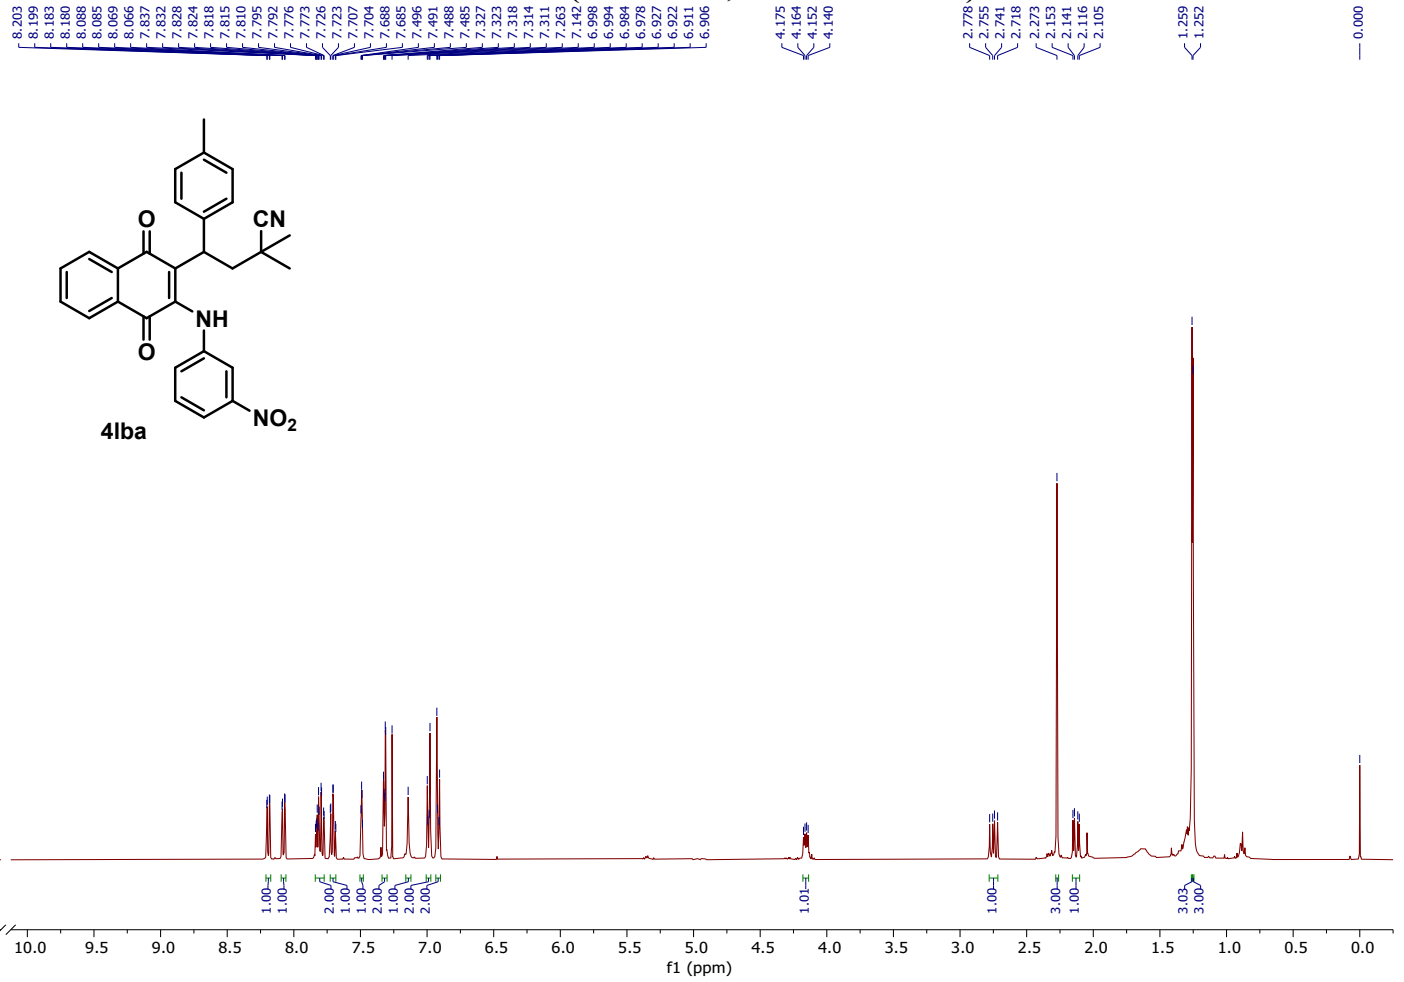

# <sup>13</sup>C-NMR (100 MHz, Chloroform-*d*)

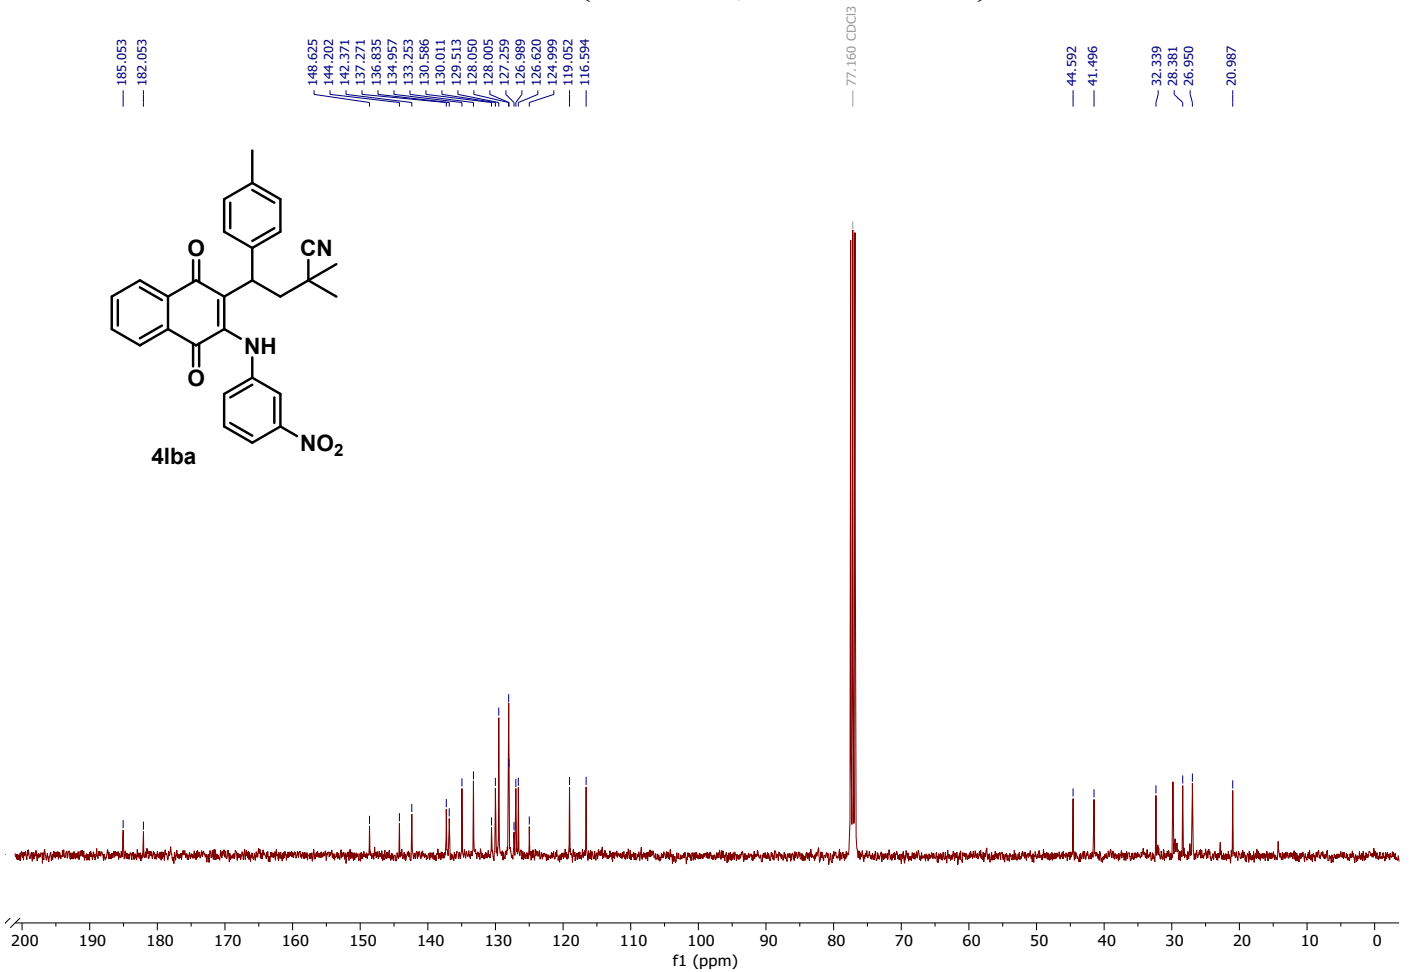



# <sup>1</sup>H-NMR (400 MHz, Chloroform-*d*)

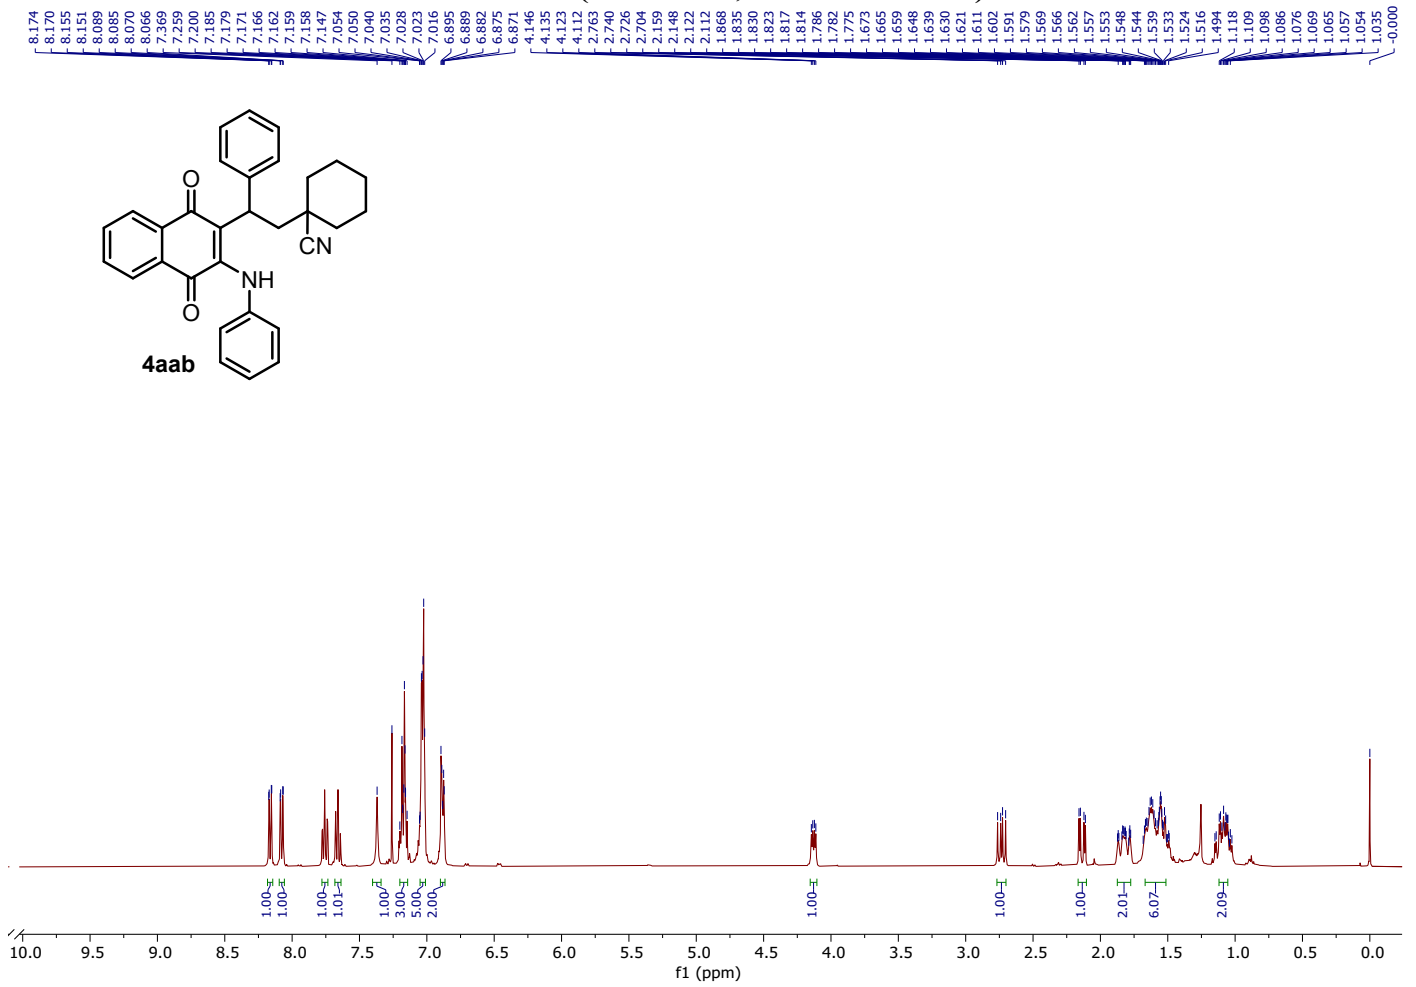

# <sup>13</sup>C-NMR (100 MHz, Chloroform-*d*)

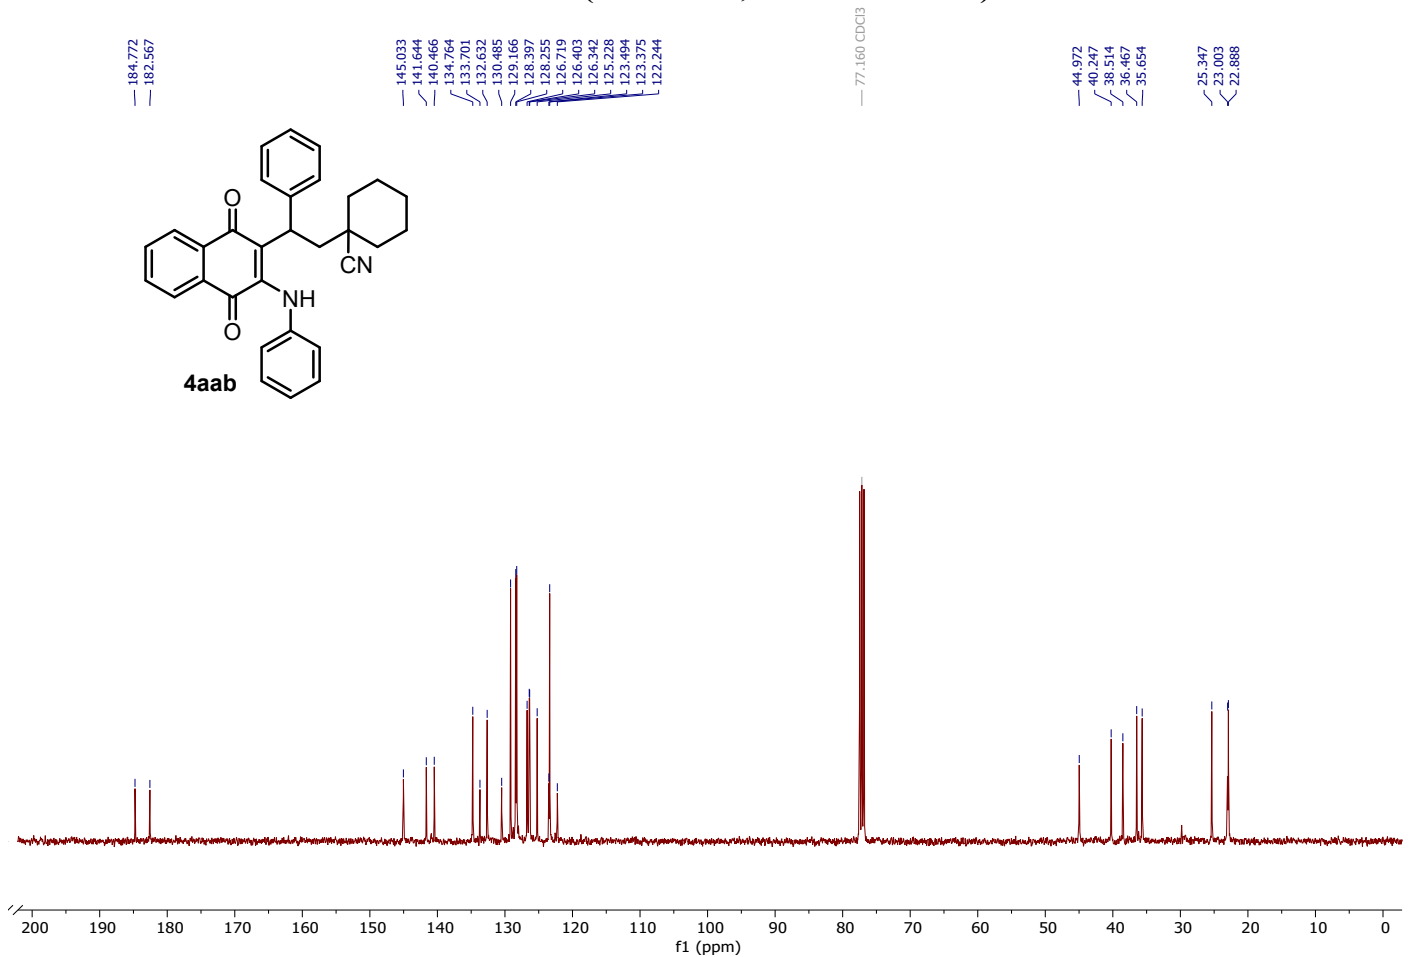

# <sup>1</sup>H-NMR (400 MHz, Chloroform-*d*)

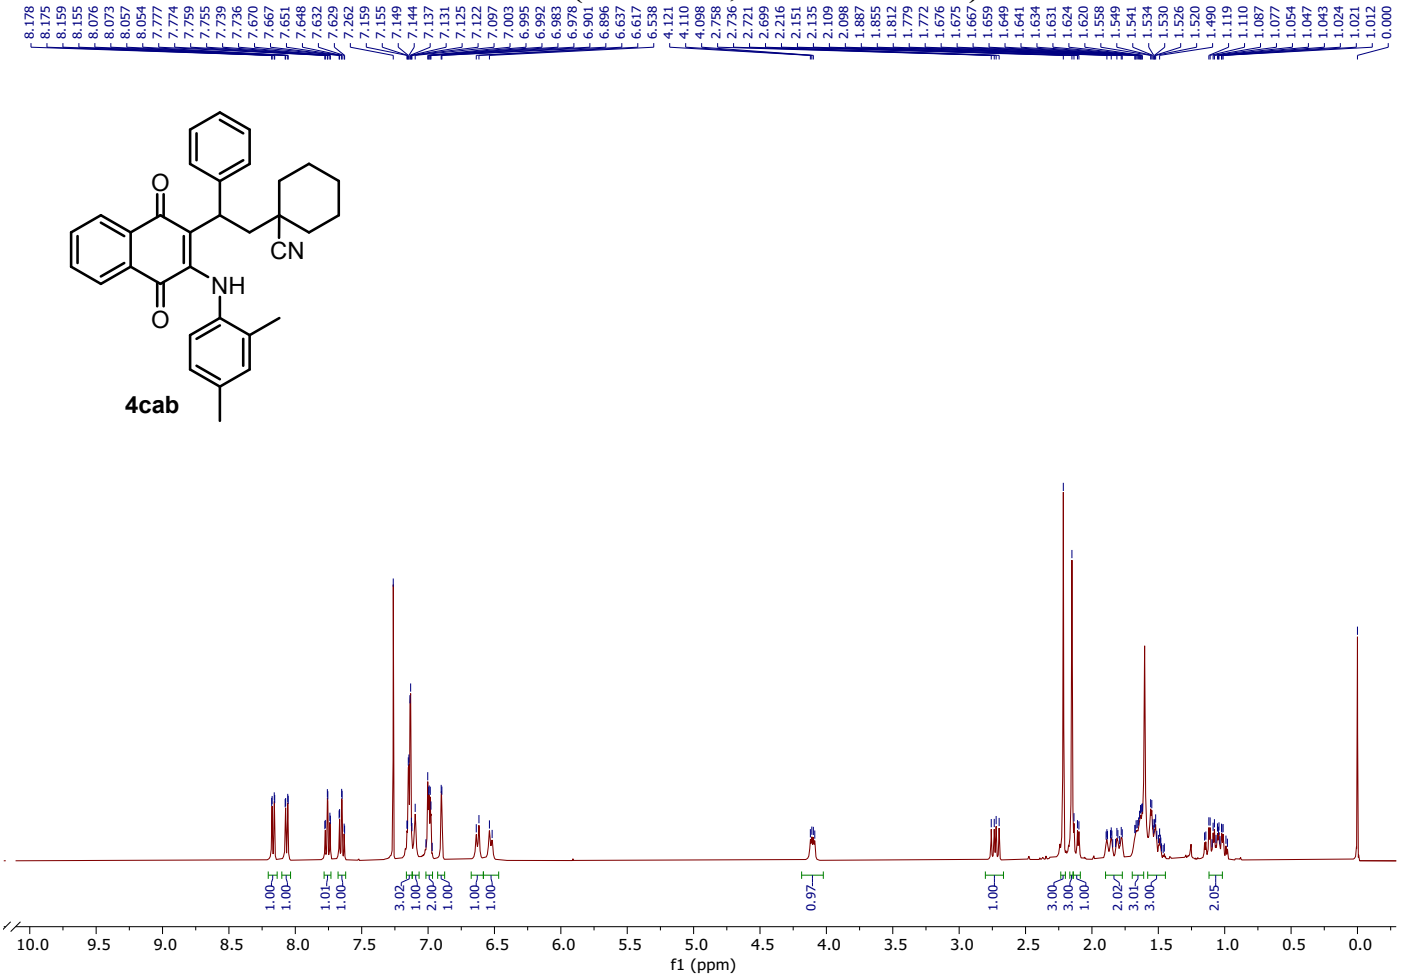

# <sup>13</sup>C-NMR (100 MHz, Chloroform-*d*)

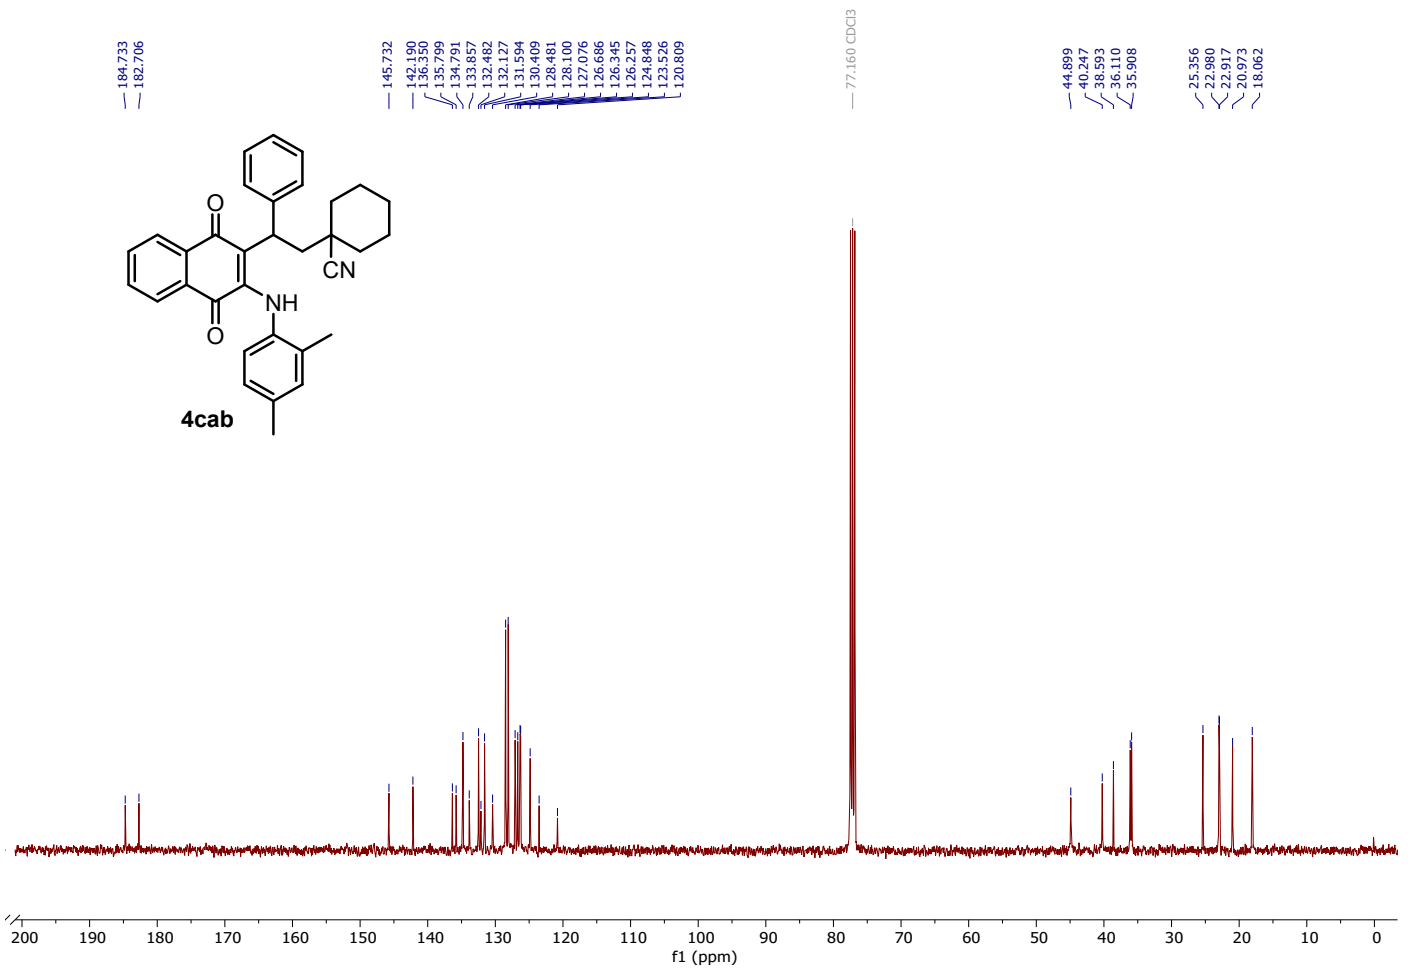

# <sup>1</sup>H-NMR (400 MHz, Chloroform-*d*)

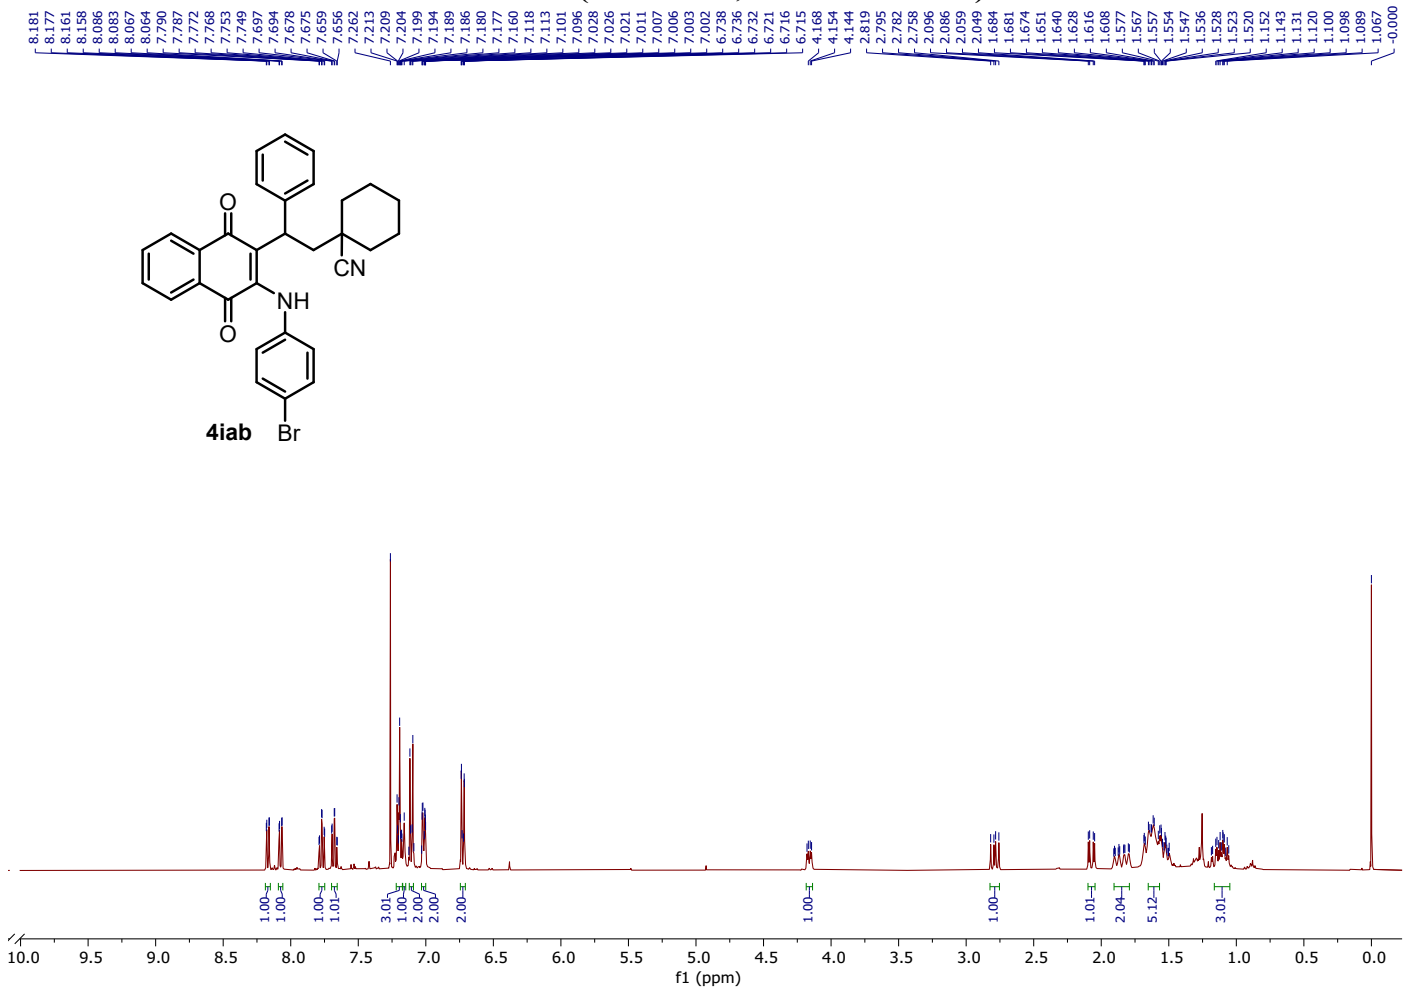

# <sup>13</sup>C-NMR (100 MHz, Chloroform-*d*)

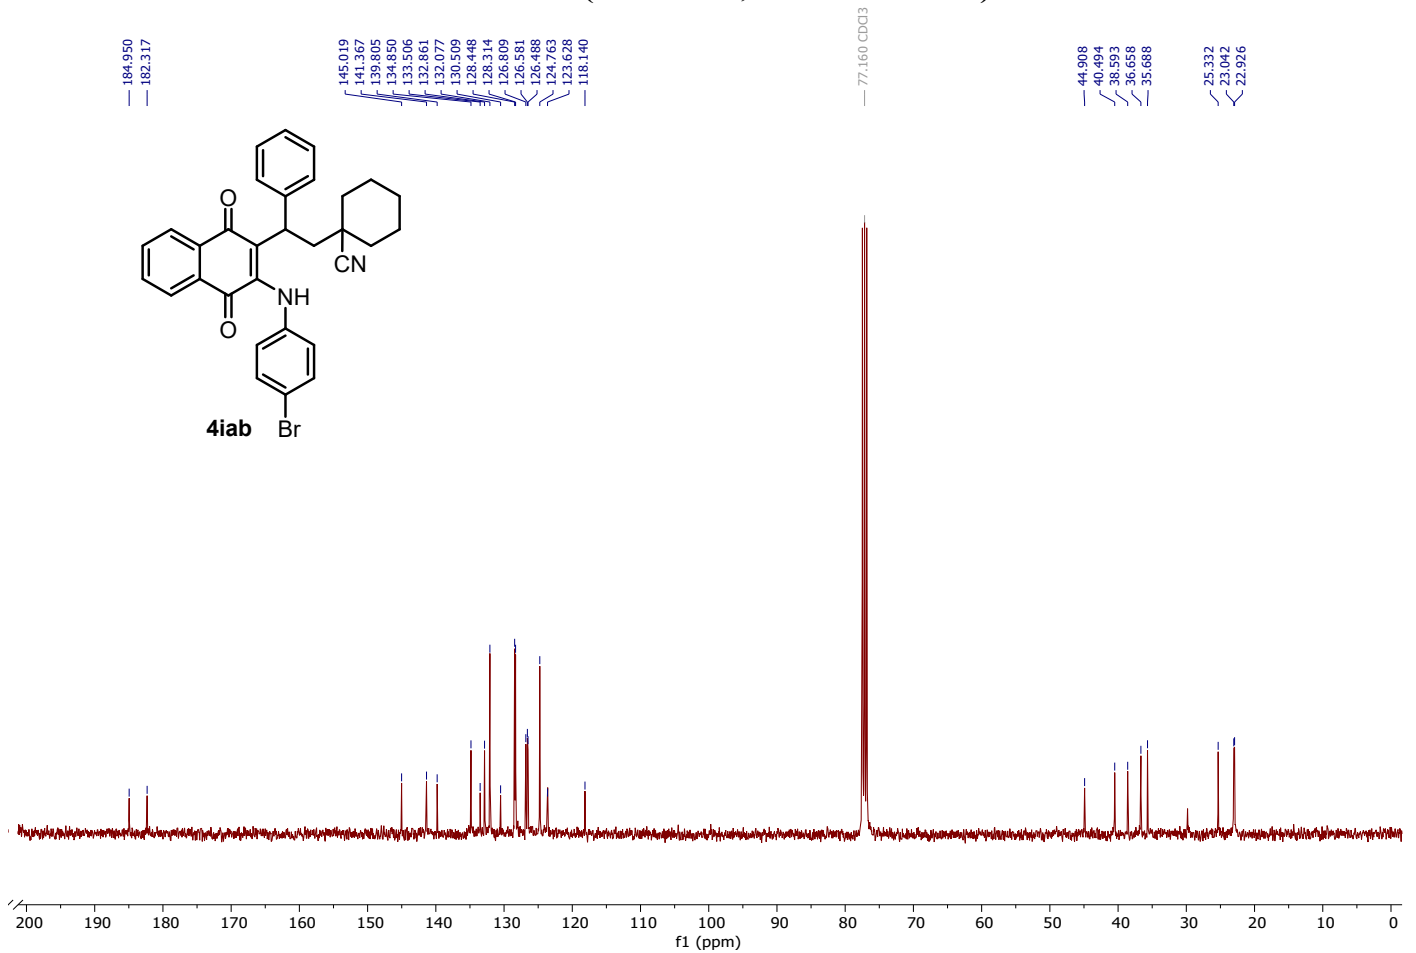

# <sup>1</sup>H-NMR (400 MHz, Chloroform-*d*)

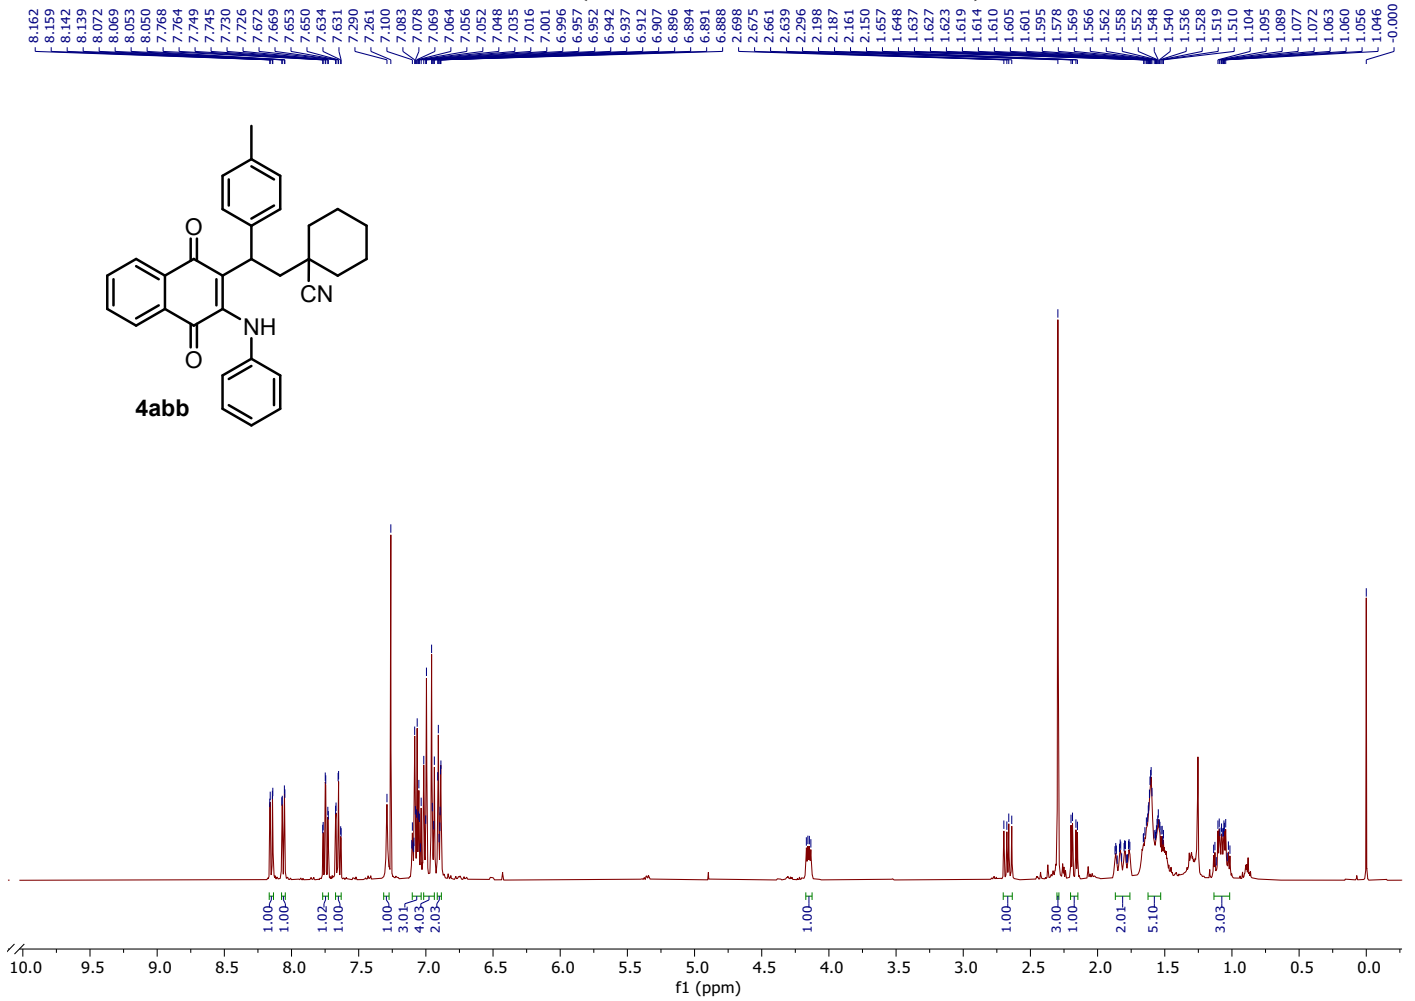

# <sup>13</sup>C-NMR (100 MHz, Chloroform-*d*)

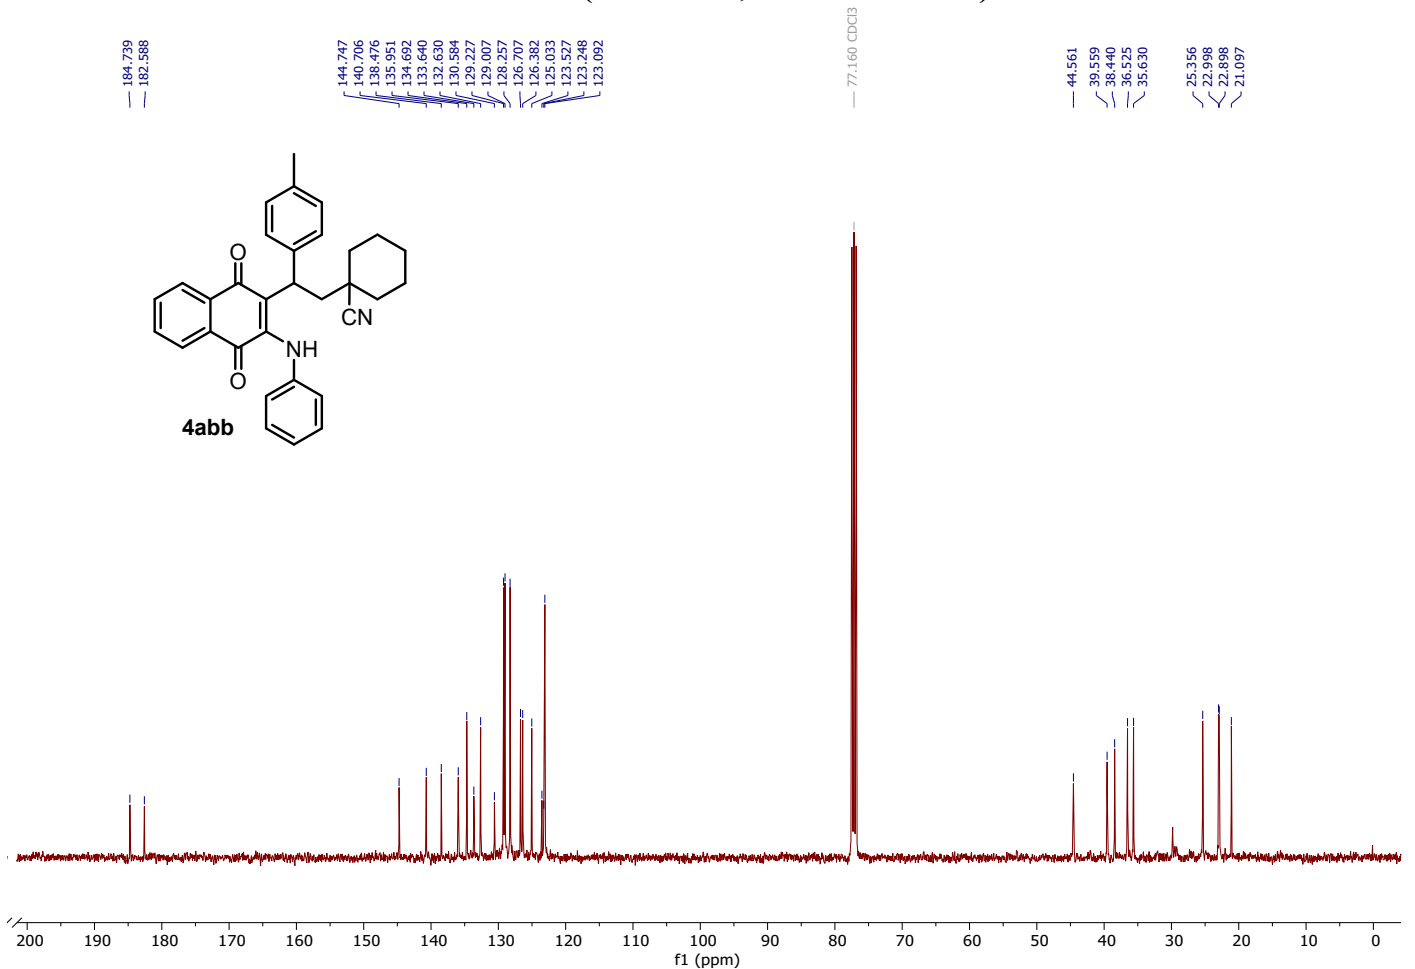

# <sup>1</sup>H-NMR (400 MHz, Chloroform-*d*)

8.162, 8.158, 8.142, 8.139, 8.113, 8.110, 8.094, 8.090, 7.794, 7.791, 7.775, 7.772, 7.756, 7.753, 7.697, 7.694, 7.679, 7.675, 7.660, 7.656, 7.513, 7.263, 7.139, 7.134, 7.131, 7.123, 7.118, 7.110, 7.074, 7.069, 7.064, 7.061, 7.058, 7.055, 7.049, 6.933, 6.927, 6.924, 6.924, 6.917, 6.911, 6.902, 6.896, 6.894, 6.890, 6.886, 6.885, 3.989, 3.989, 3.977, 3.967, 3.967, 2.732, 2.710, 2.695, 2.673, 2.064, 2.054, 2.027, 2.017, 1.814, 1.804, 1.802, 1.798, 1.793, 1.788, 1.784, 1.772, 1.768, 1.585, 1.563, 1.553, 1.544, 1.536, 1.521, 1.513, 1.505, 1.482, 1.478, 1.096, 1.086, 1.075, 1.064, 1.054, 1.045, 1.035, 1.031, 1.023, 0.000

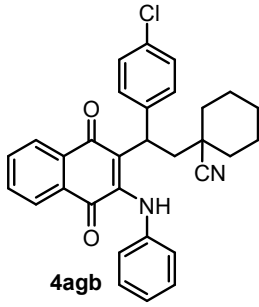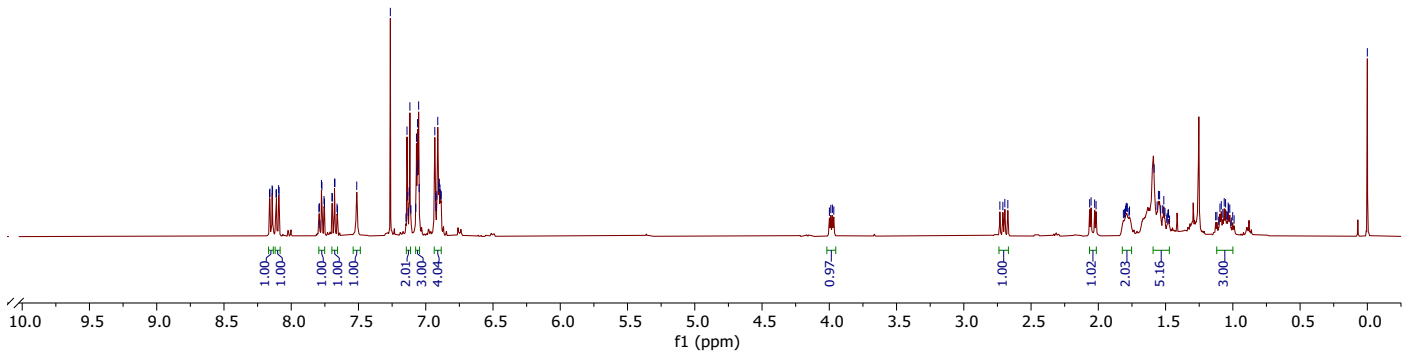

# <sup>13</sup>C-NMR (100 MHz, Chloroform-*d*)

184.782, 182.546

145.290, 140.422, 140.214, 134.982, 133.751, 132.750, 131.987, 130.274, 129.928, 129.319, 128.207, 126.755, 126.518, 125.778, 125.919, 125.415, 120.603

77.160 CDCl<sub>3</sub>, 45.511, 40.292, 38.616, 36.272, 35.807, 25.318, 23.014, 22.897

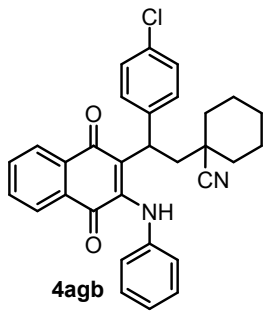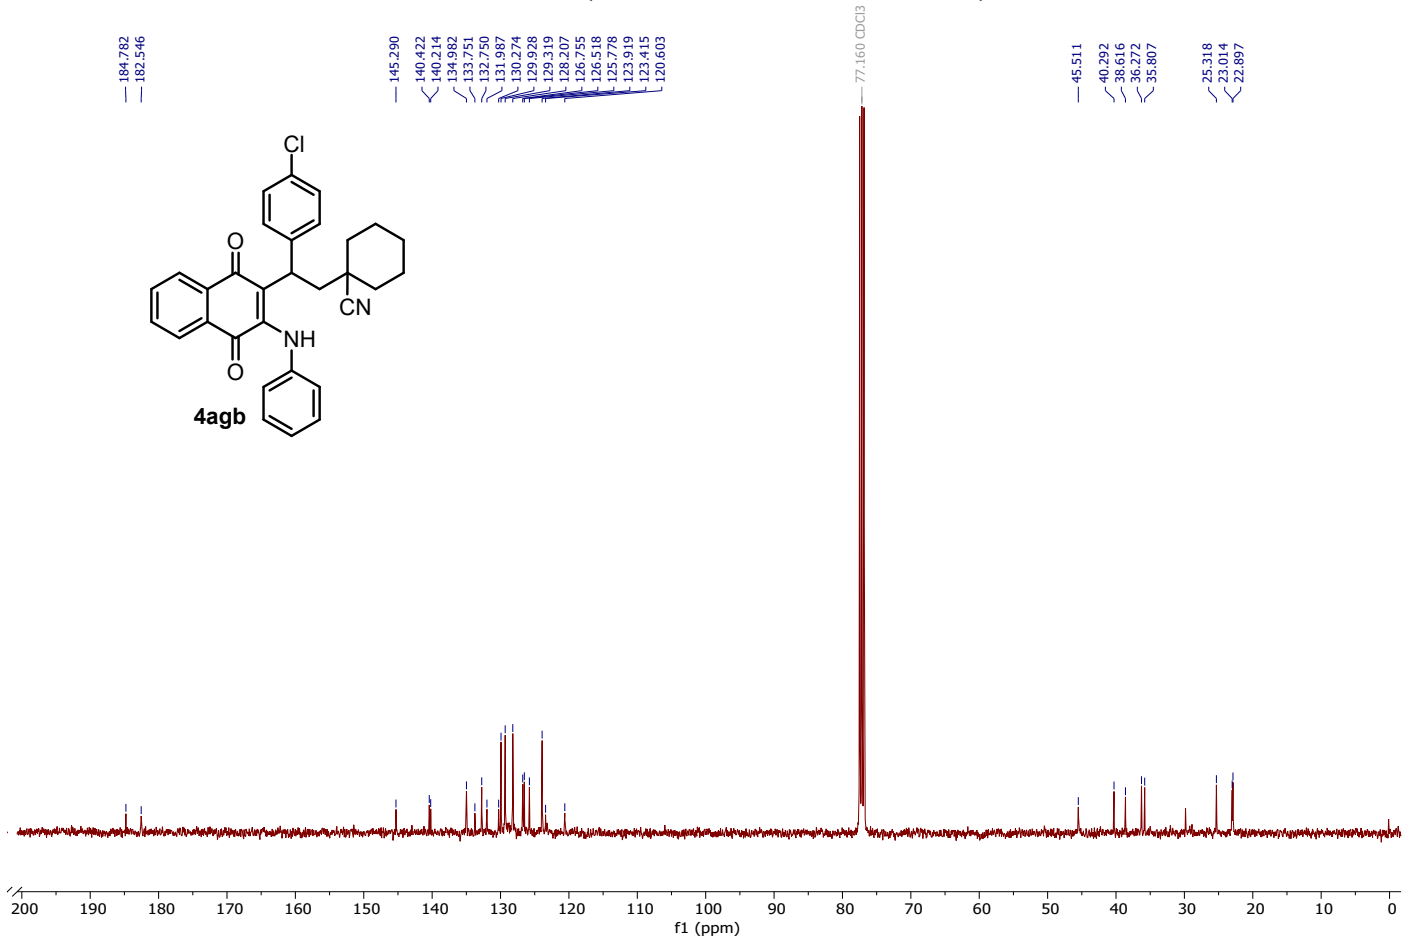

# <sup>1</sup>H-NMR (400 MHz, Chloroform-*d*)

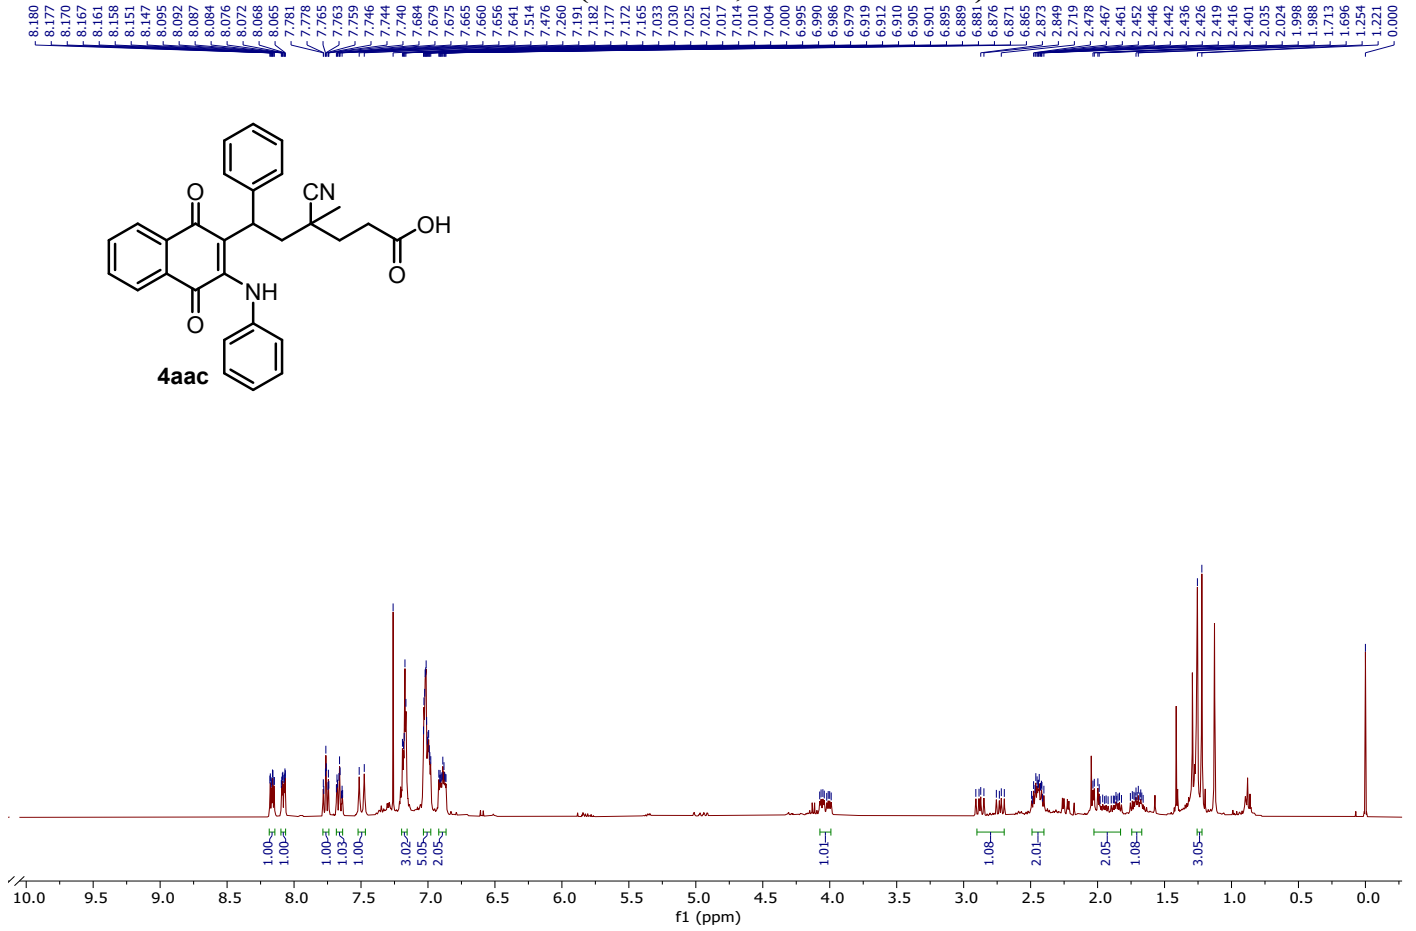

# <sup>13</sup>C-NMR (100 MHz, Chloroform-*d*)

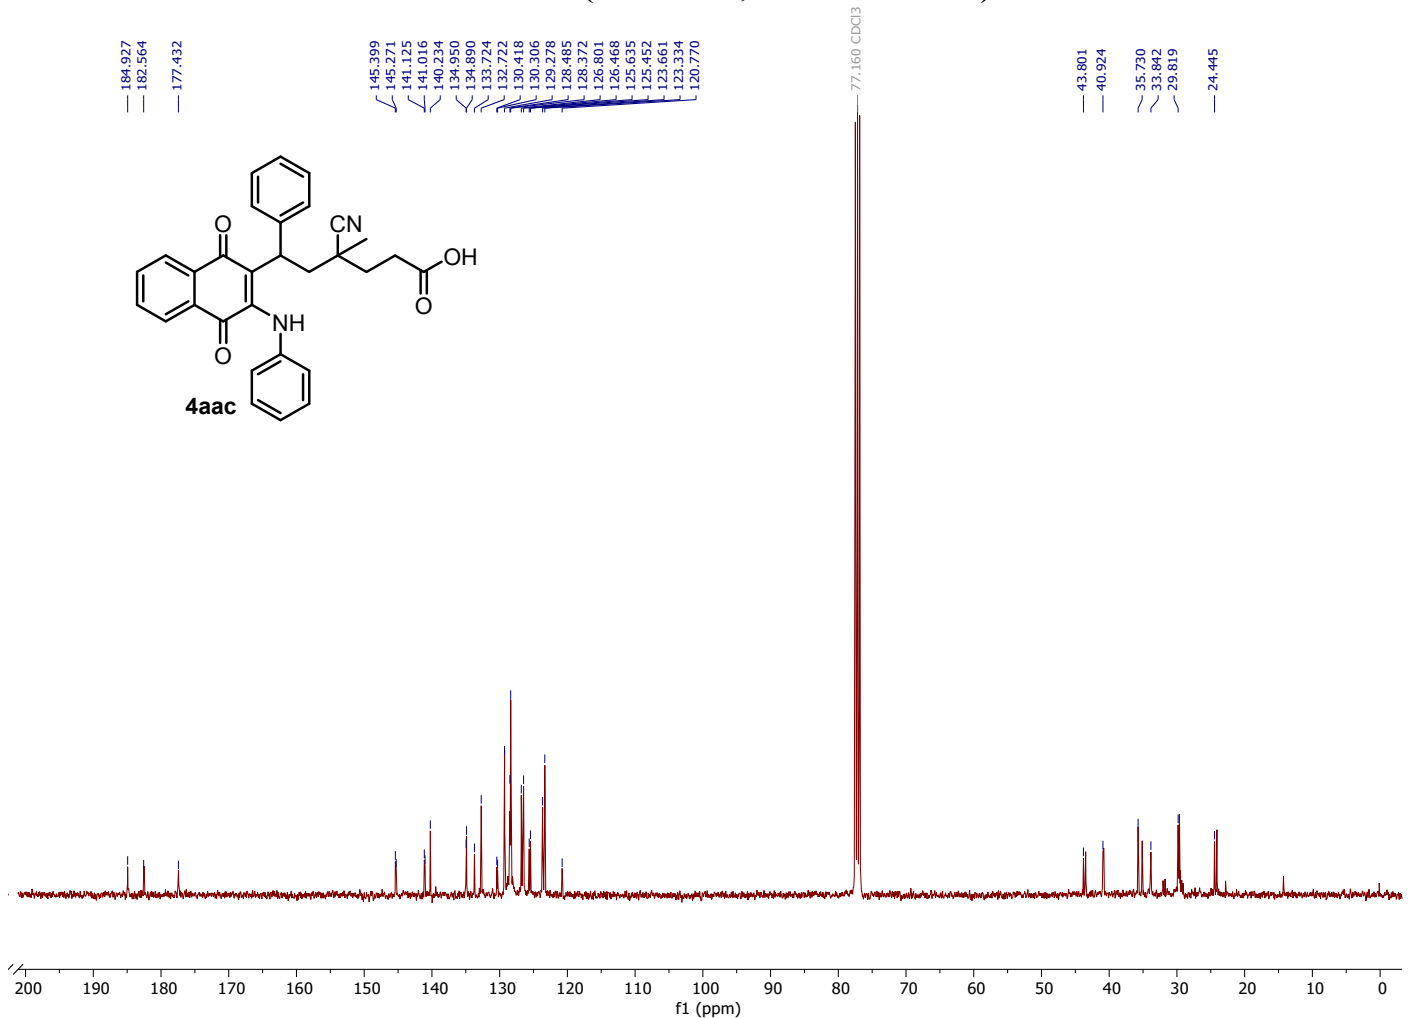



# <sup>1</sup>H-NMR (400 MHz, Chloroform-*d*)

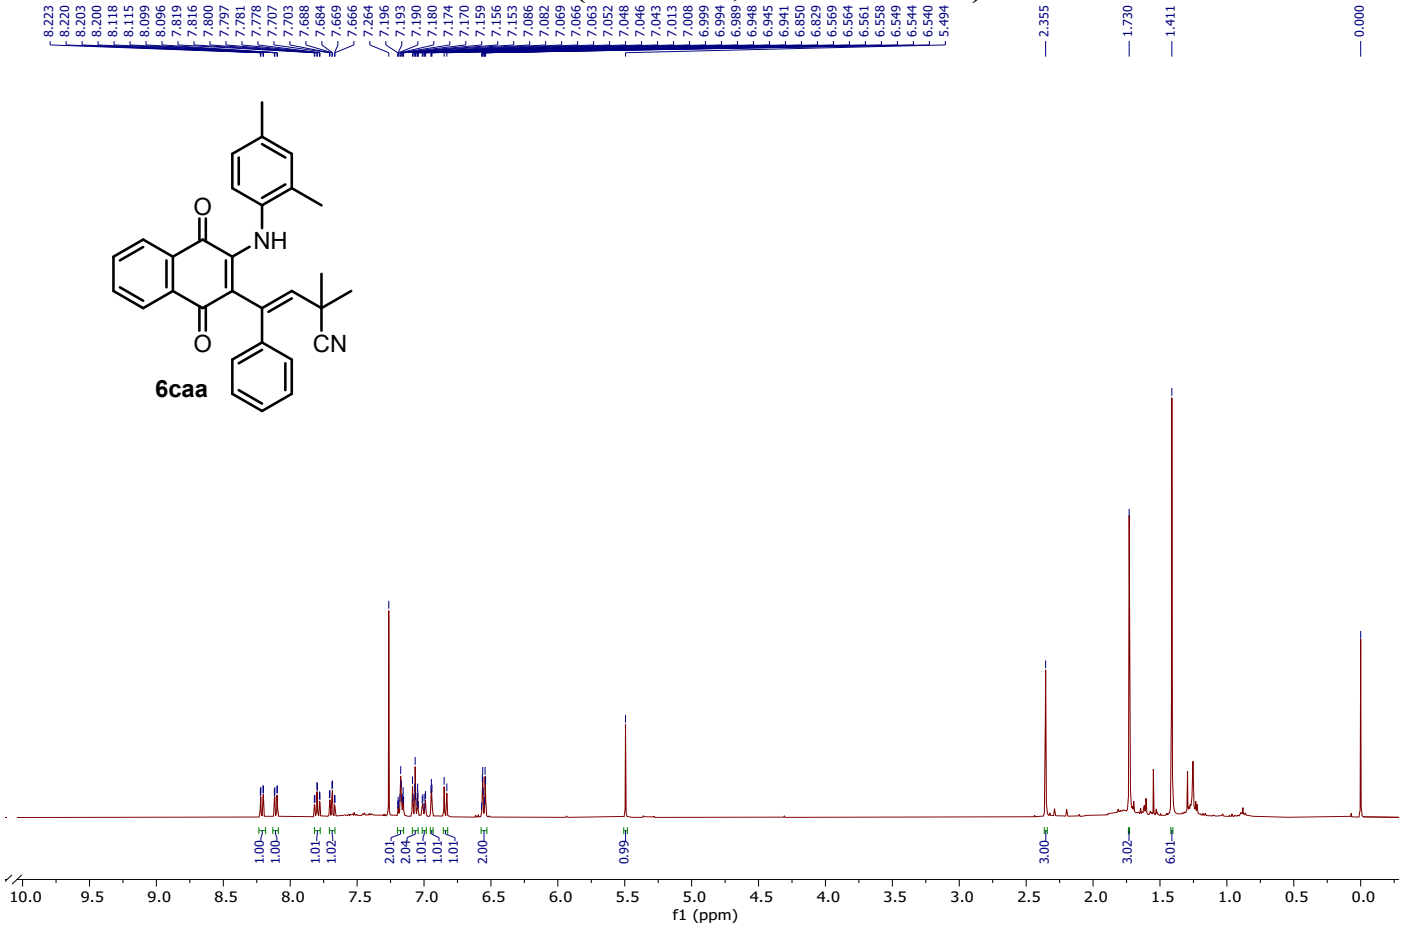

# <sup>13</sup>C-NMR (100 MHz, Chloroform-*d*)

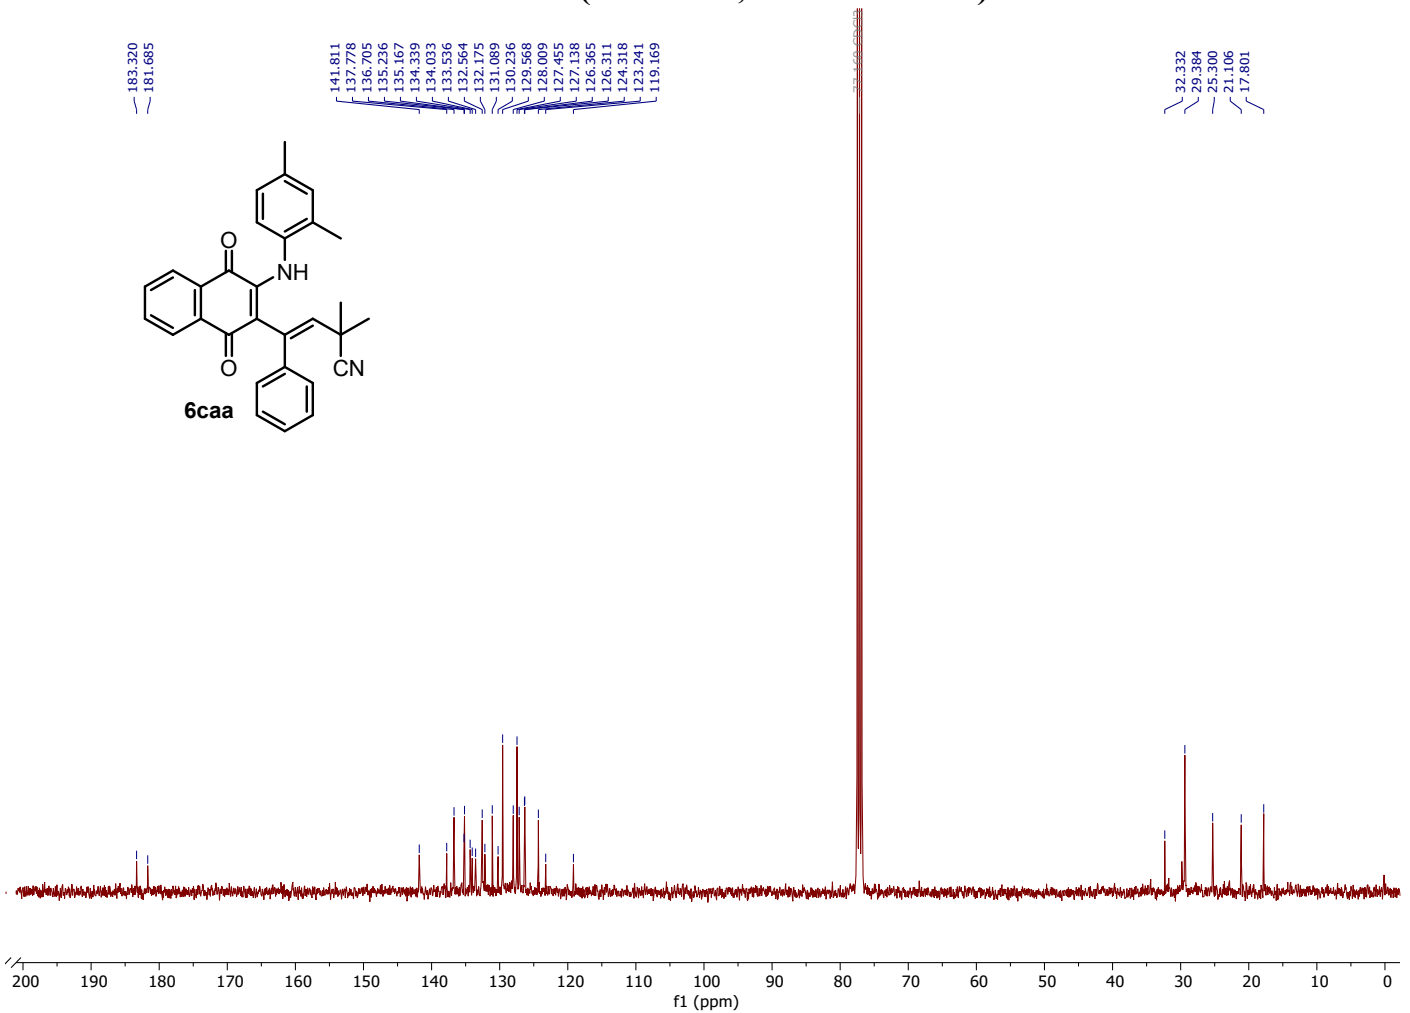



# <sup>1</sup>H-NMR (500 MHz, Chloroform-*d*)

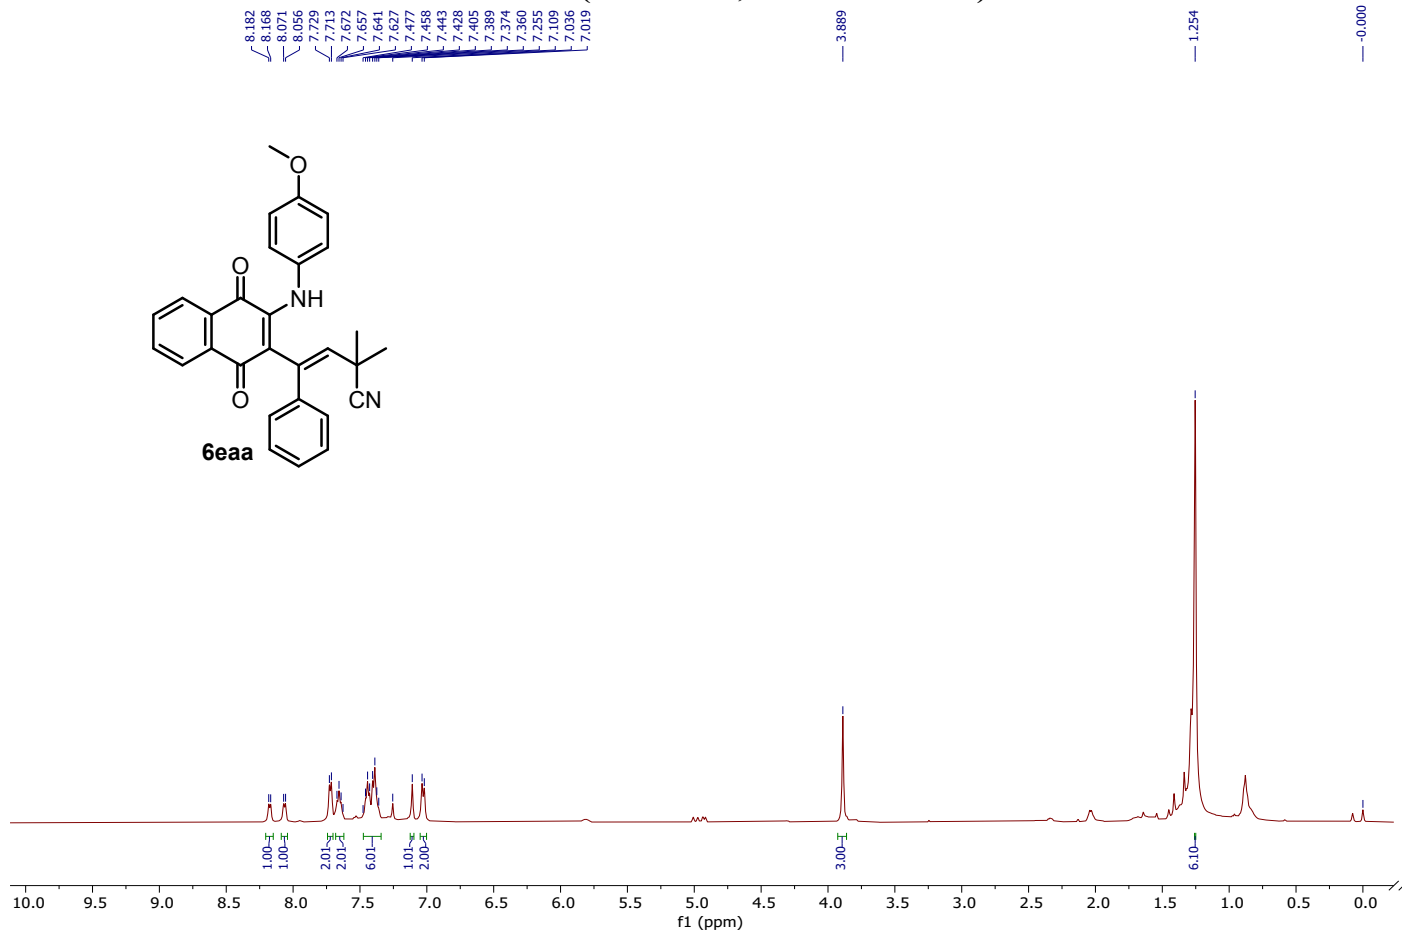

# <sup>13</sup>C-NMR (100 MHz, Chloroform-*d*)

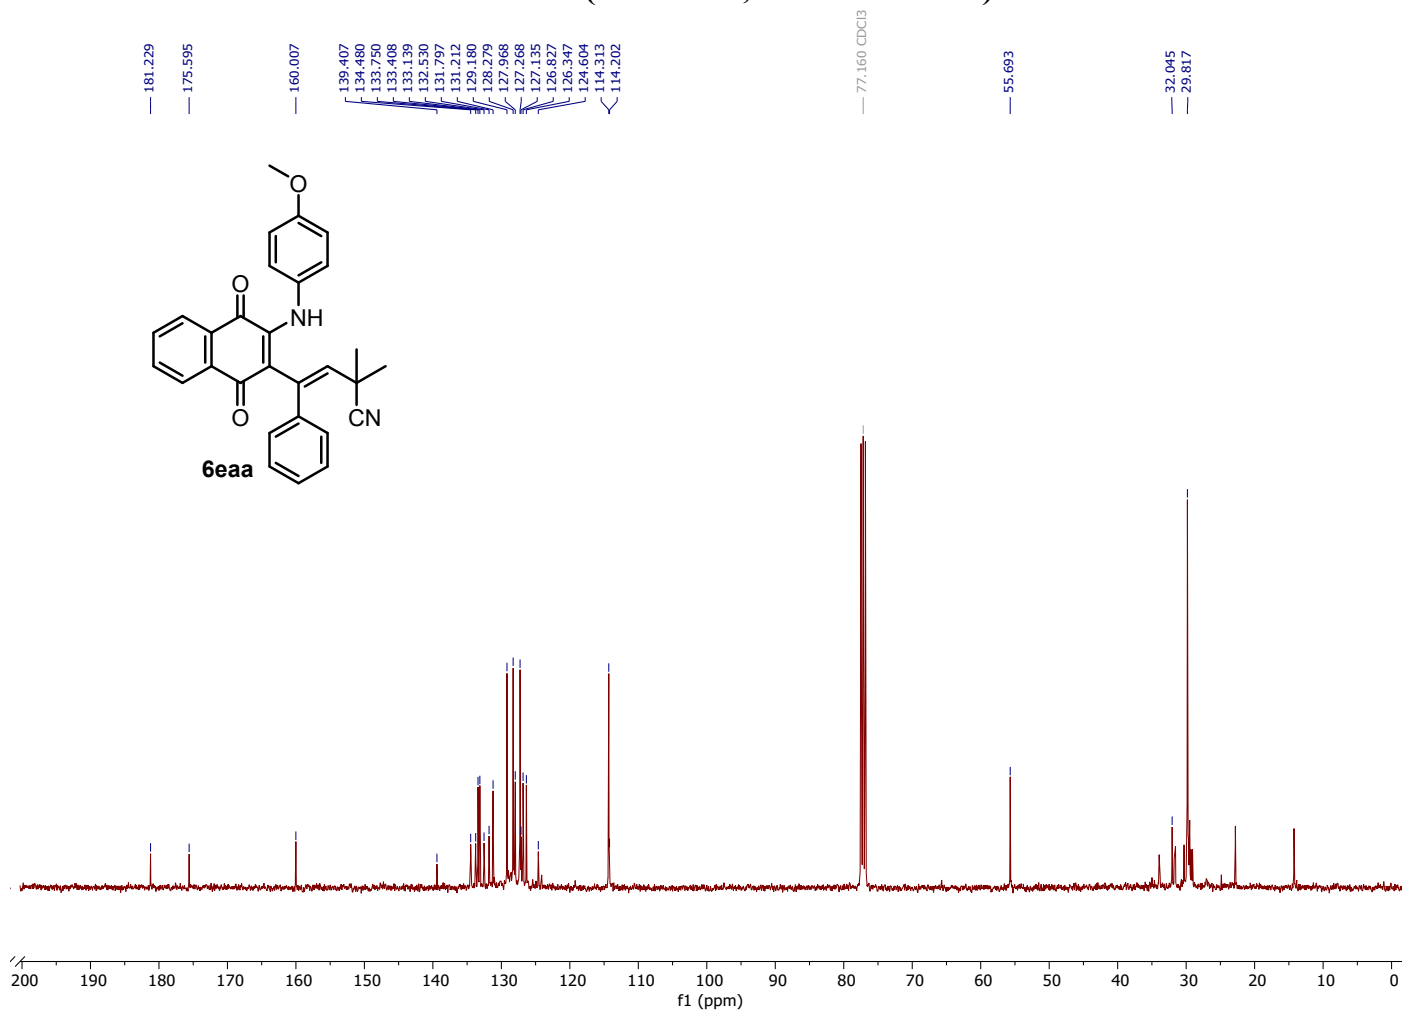

# <sup>1</sup>H-NMR (500 MHz, Chloroform-*d*)

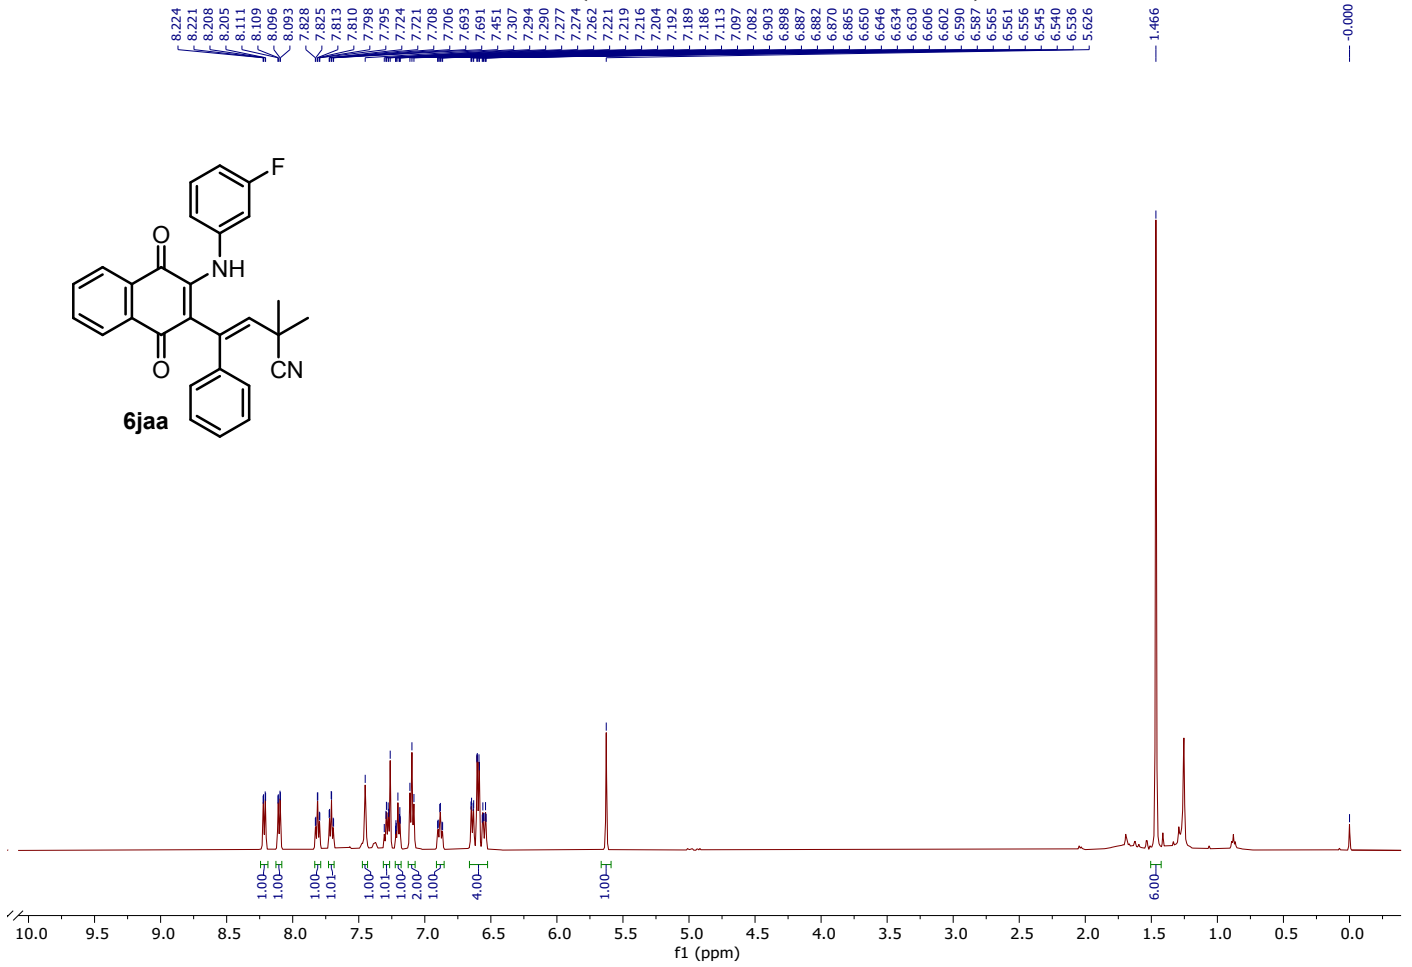

# <sup>13</sup>C-NMR (100 MHz, Chloroform-*d*)

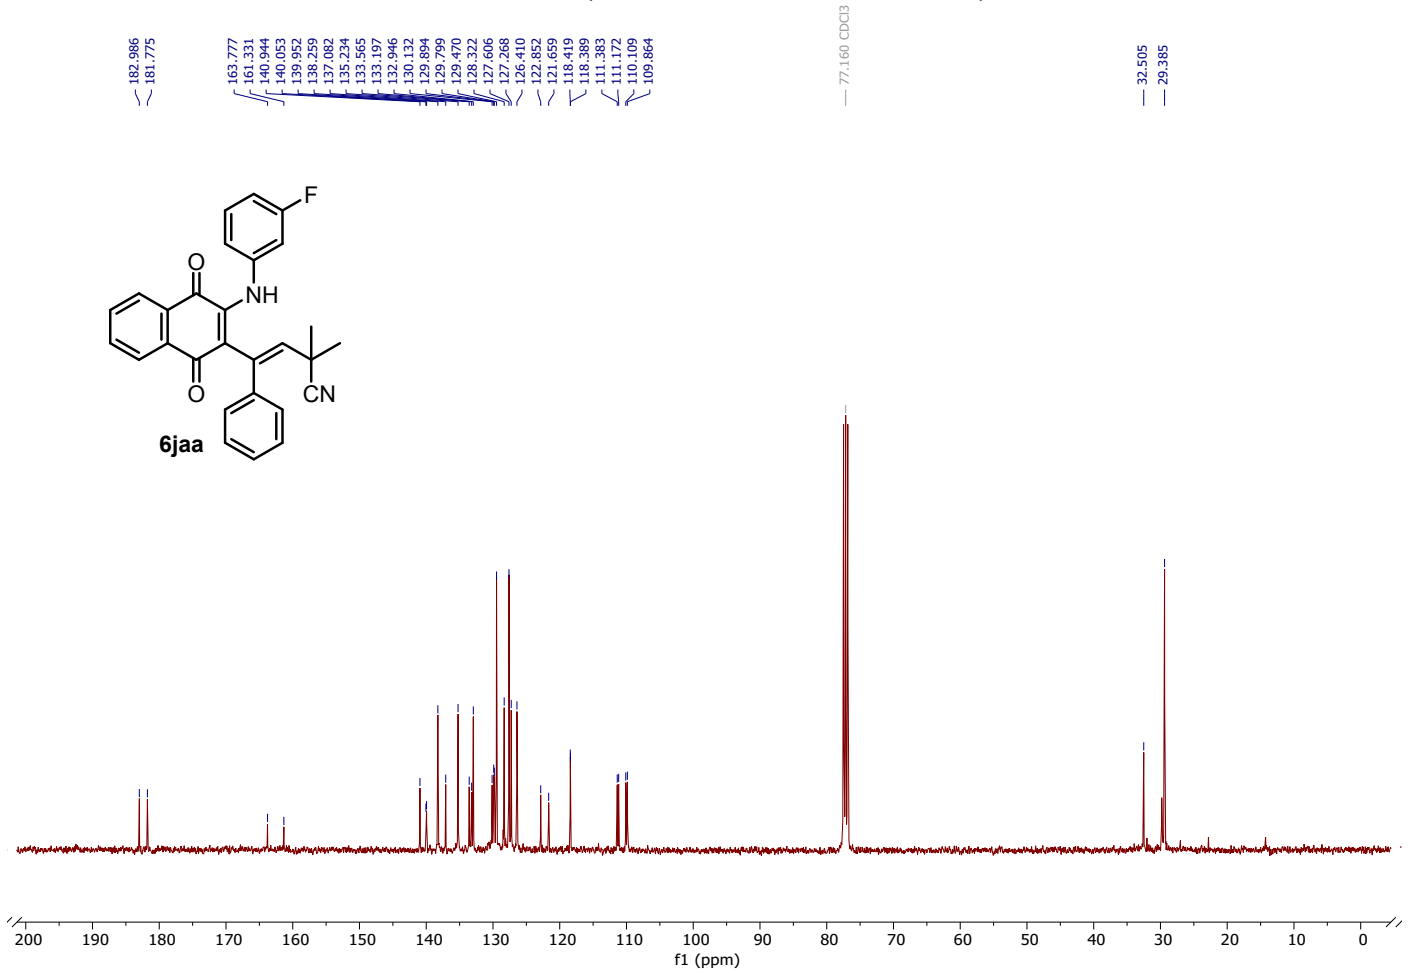

# <sup>1</sup>H-NMR (500 MHz, Chloroform-*d*)

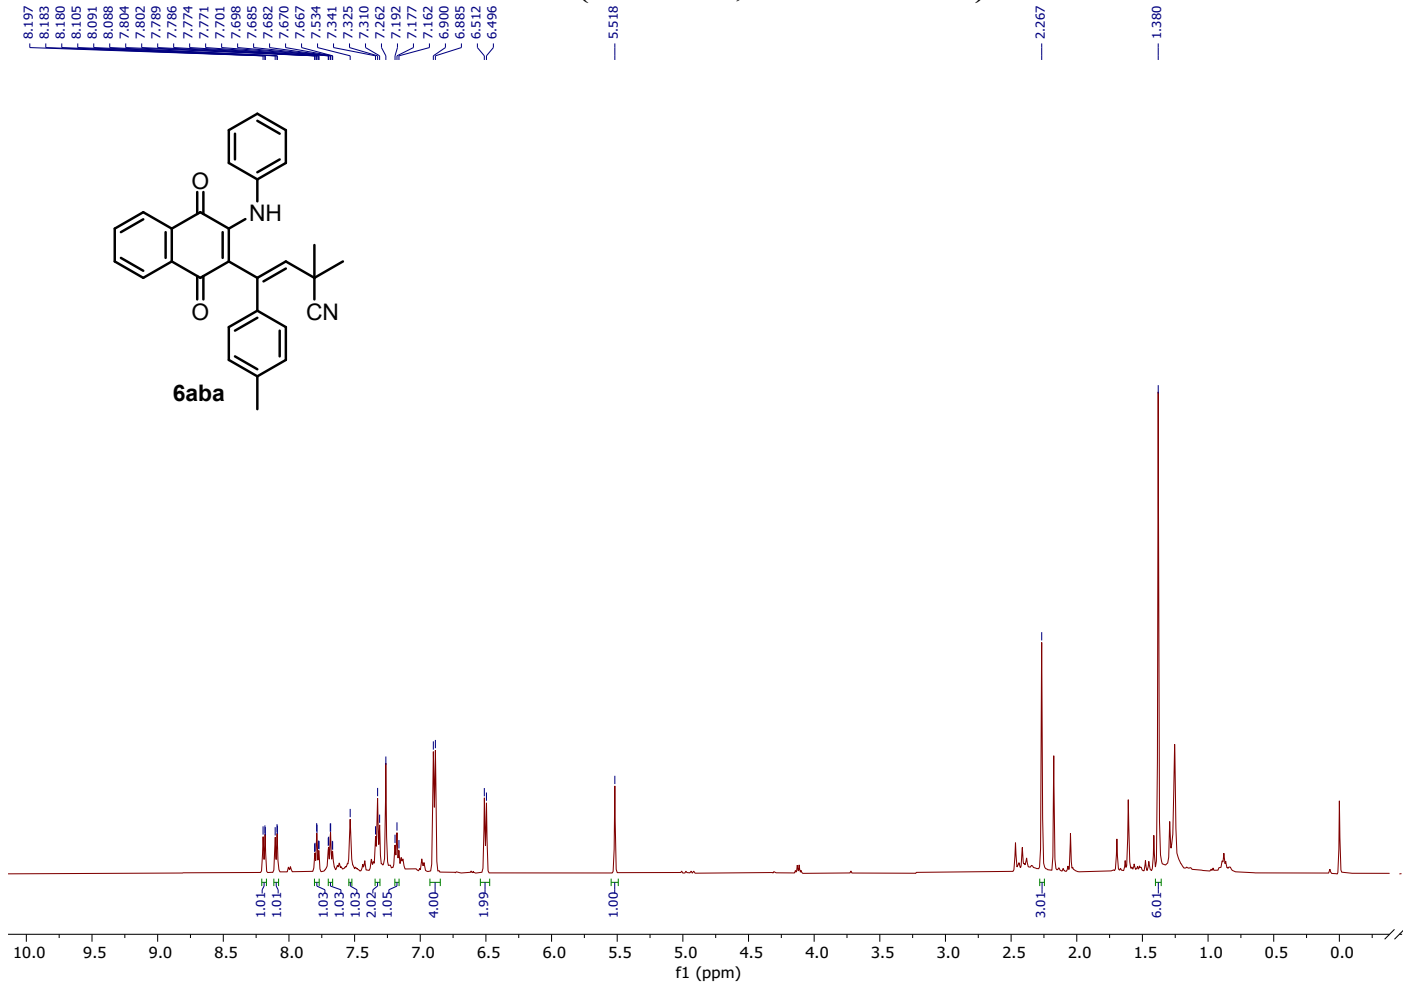

# <sup>13</sup>C-NMR (100 MHz, Chloroform-*d*)

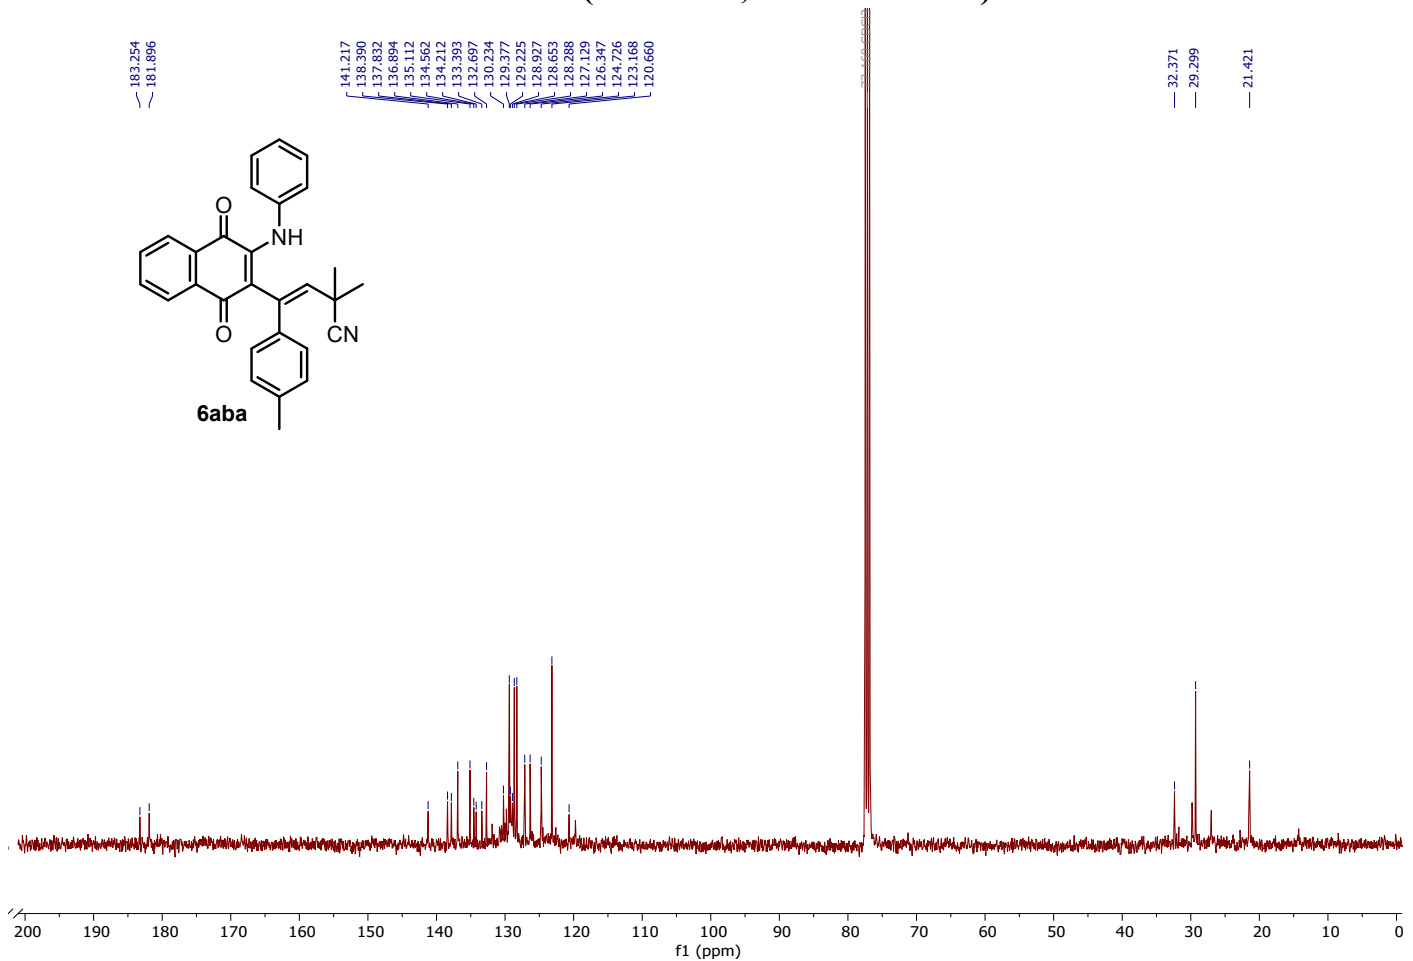

# <sup>1</sup>H-NMR (400 MHz, Chloroform-*d*)

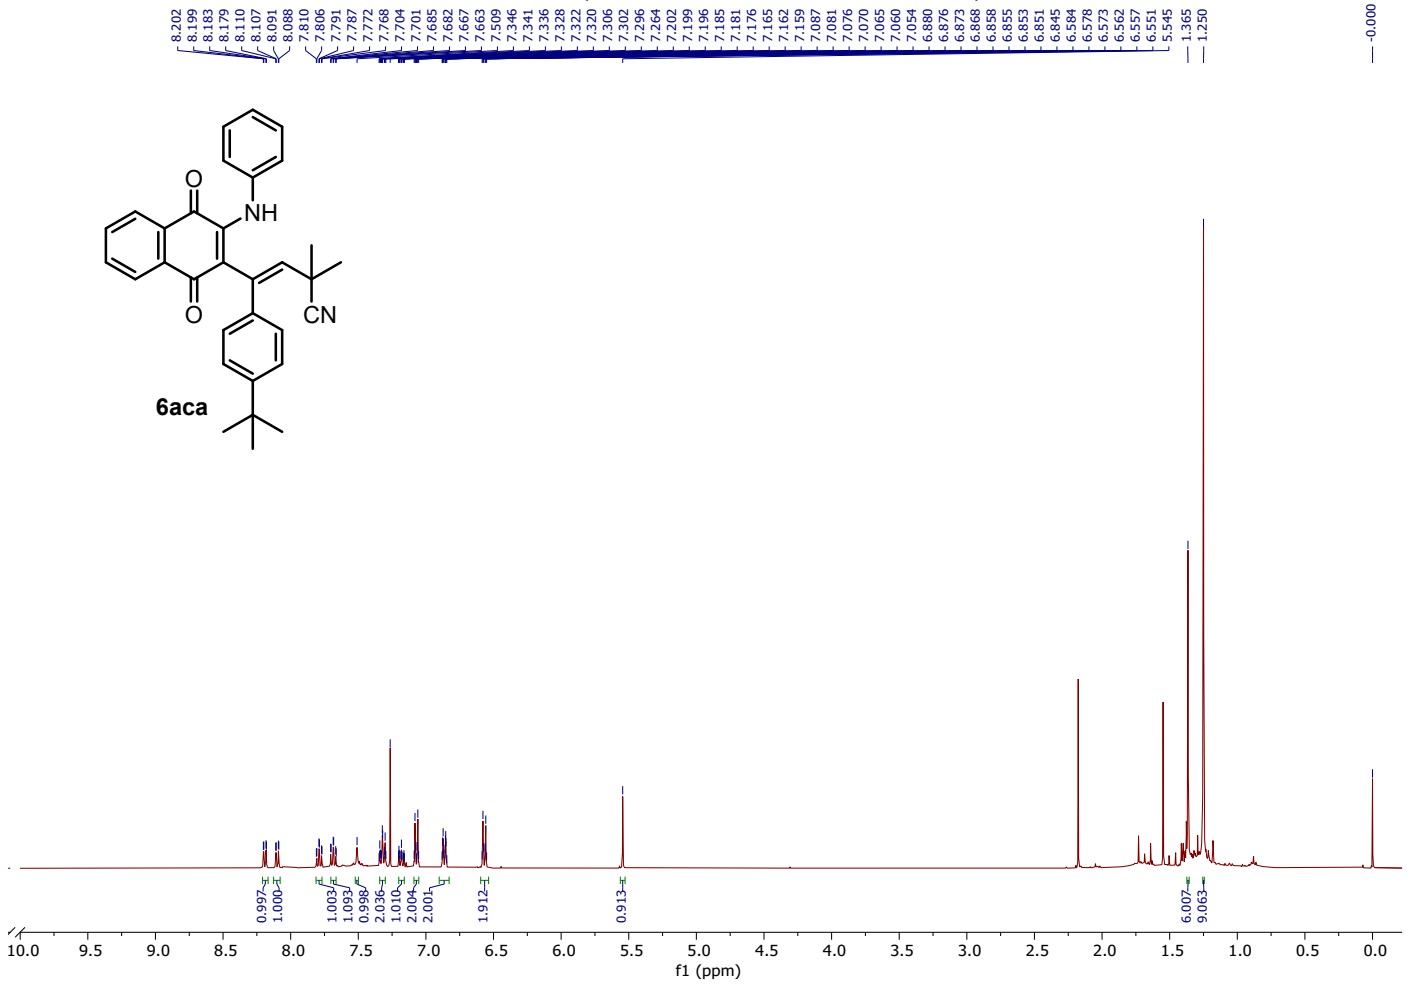

# <sup>13</sup>C-NMR (100 MHz, Chloroform-*d*)

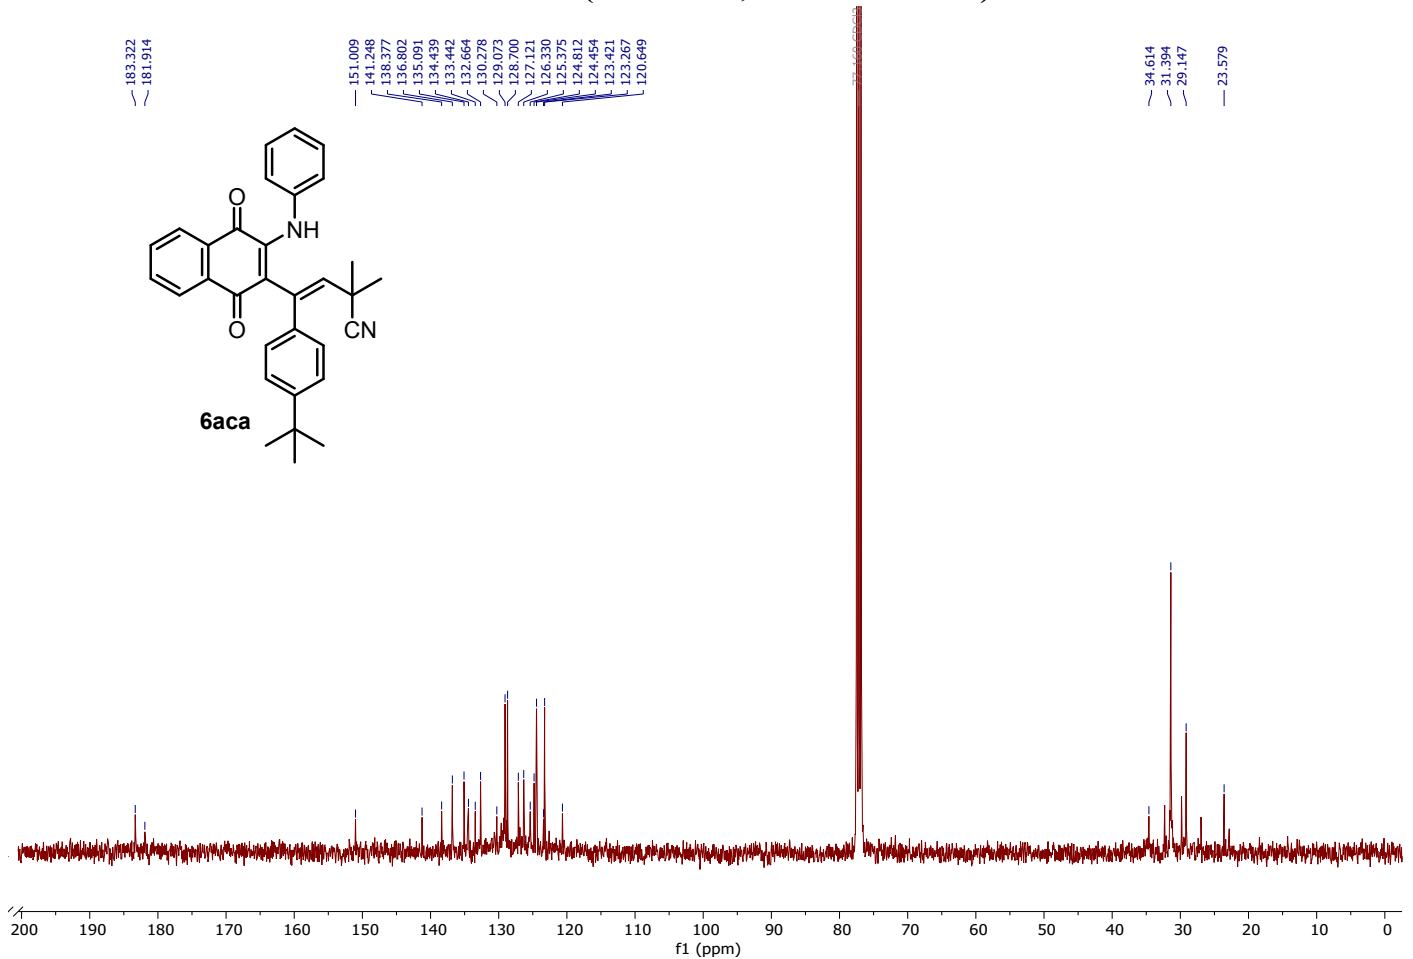

# <sup>1</sup>H-NMR (500 MHz, Chloroform-*d*)

8.200  
8.185  
8.121  
8.106  
7.818  
7.803  
7.788  
7.714  
7.699  
7.684  
7.581  
7.350  
7.333  
7.318  
7.262  
7.207  
7.194  
7.190  
6.887  
6.872  
6.453  
6.449  
6.437  
6.436  
5.583

1.403

0.000

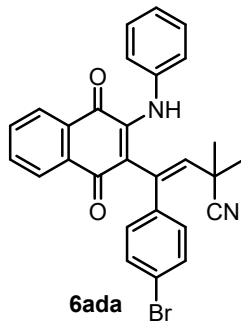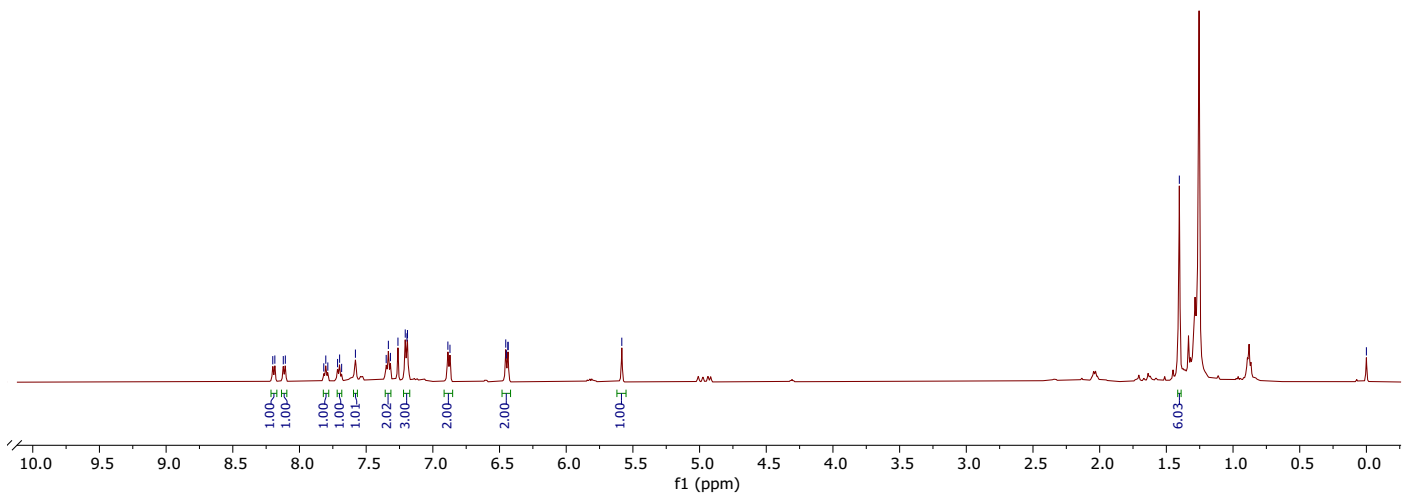

# <sup>13</sup>C-NMR (100 MHz, Chloroform-*d*)

183.053  
181.741  
141.323  
139.433  
138.137  
137.869  
136.510  
136.271  
133.346  
133.009  
132.898  
132.836  
130.703  
130.738  
130.198  
128.773  
127.210  
126.472  
124.996  
123.247  
122.912  
122.238  
32.365  
29.279

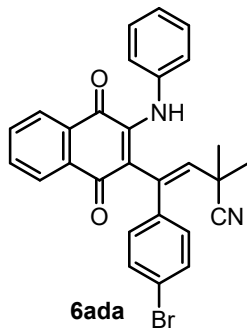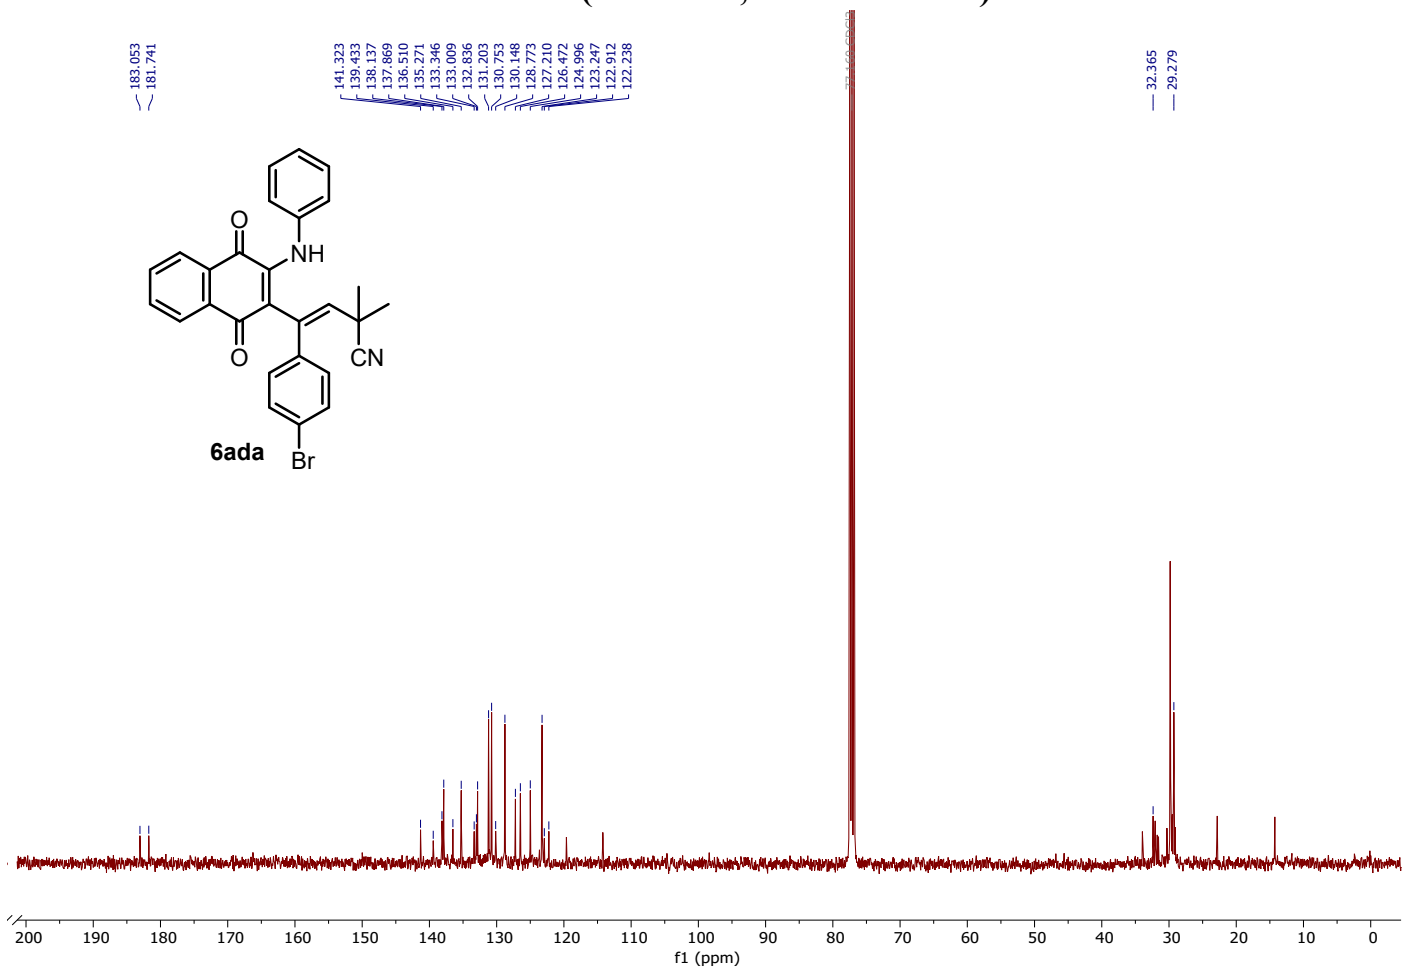

# <sup>1</sup>H-NMR (500 MHz, Chloroform-*d*)

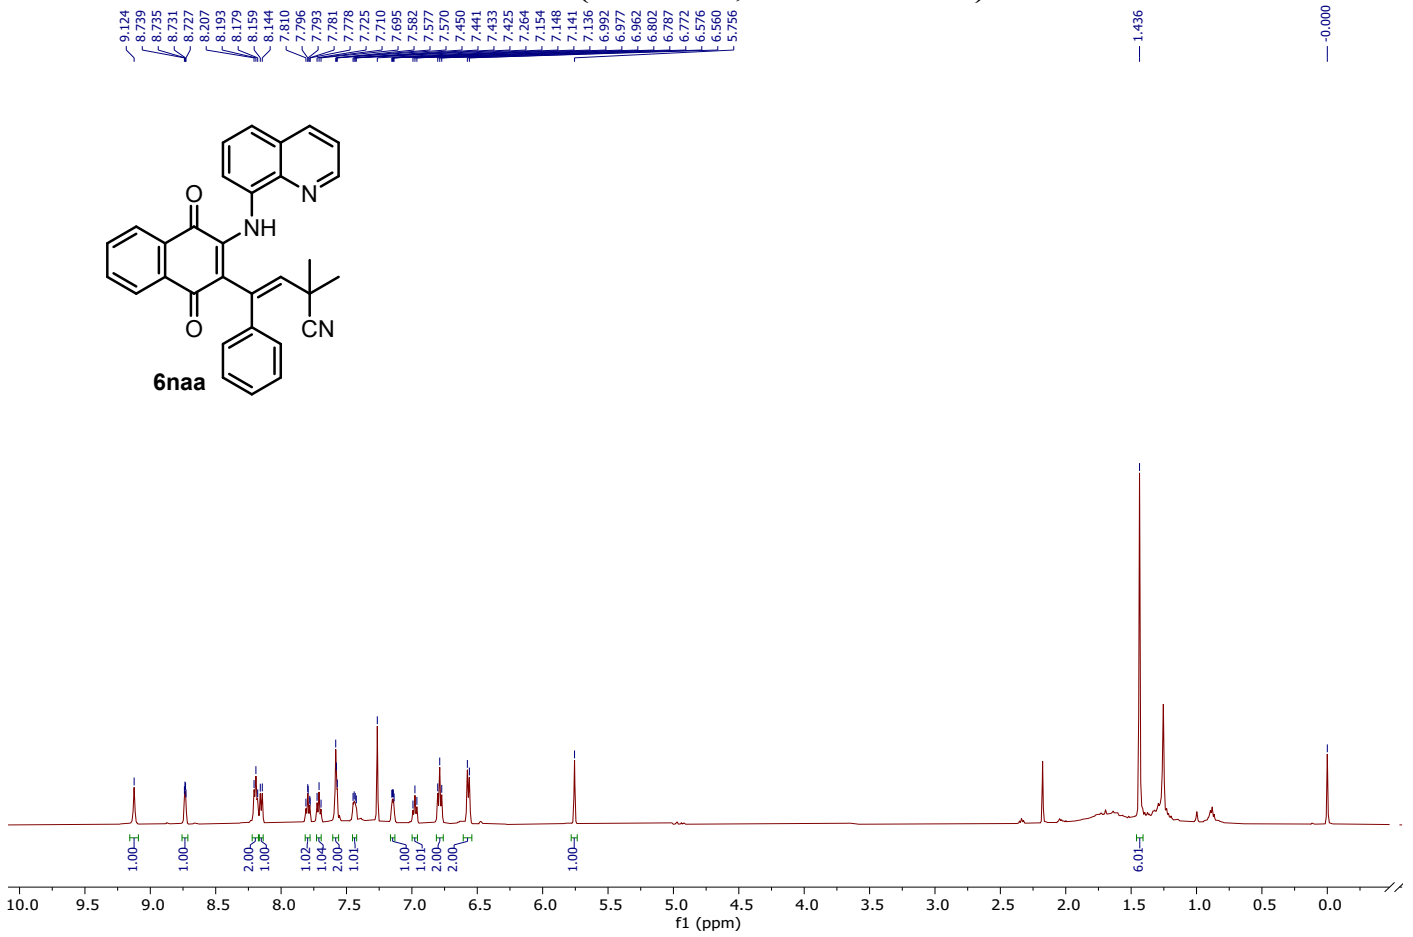

# <sup>13</sup>C-NMR (100 MHz, Chloroform-*d*)

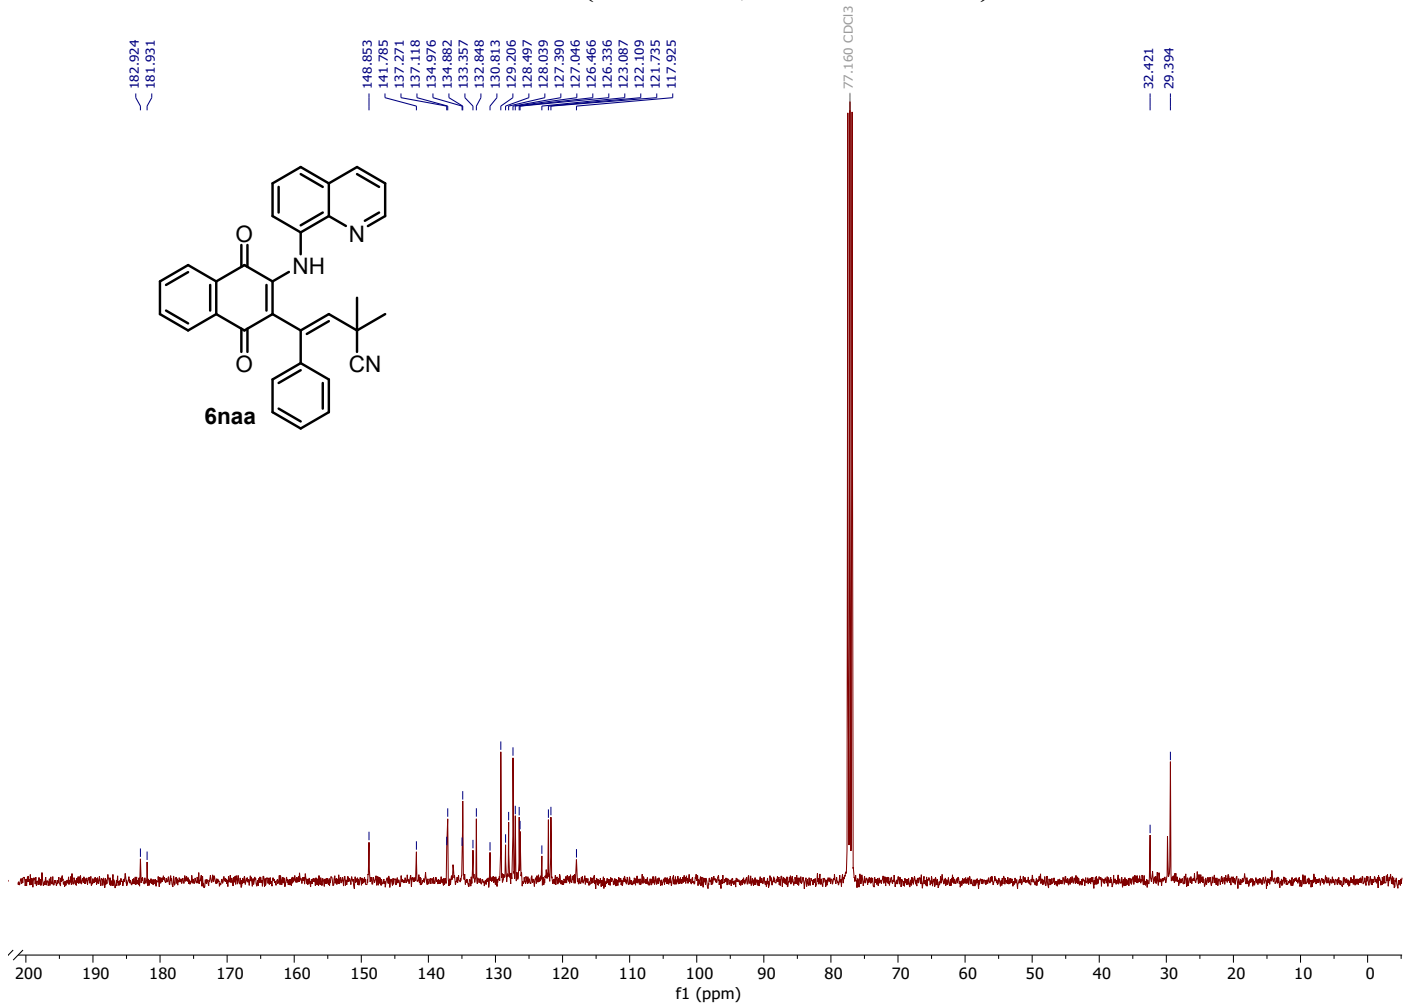

# <sup>1</sup>H-NMR (400 MHz, Chloroform-*d*)

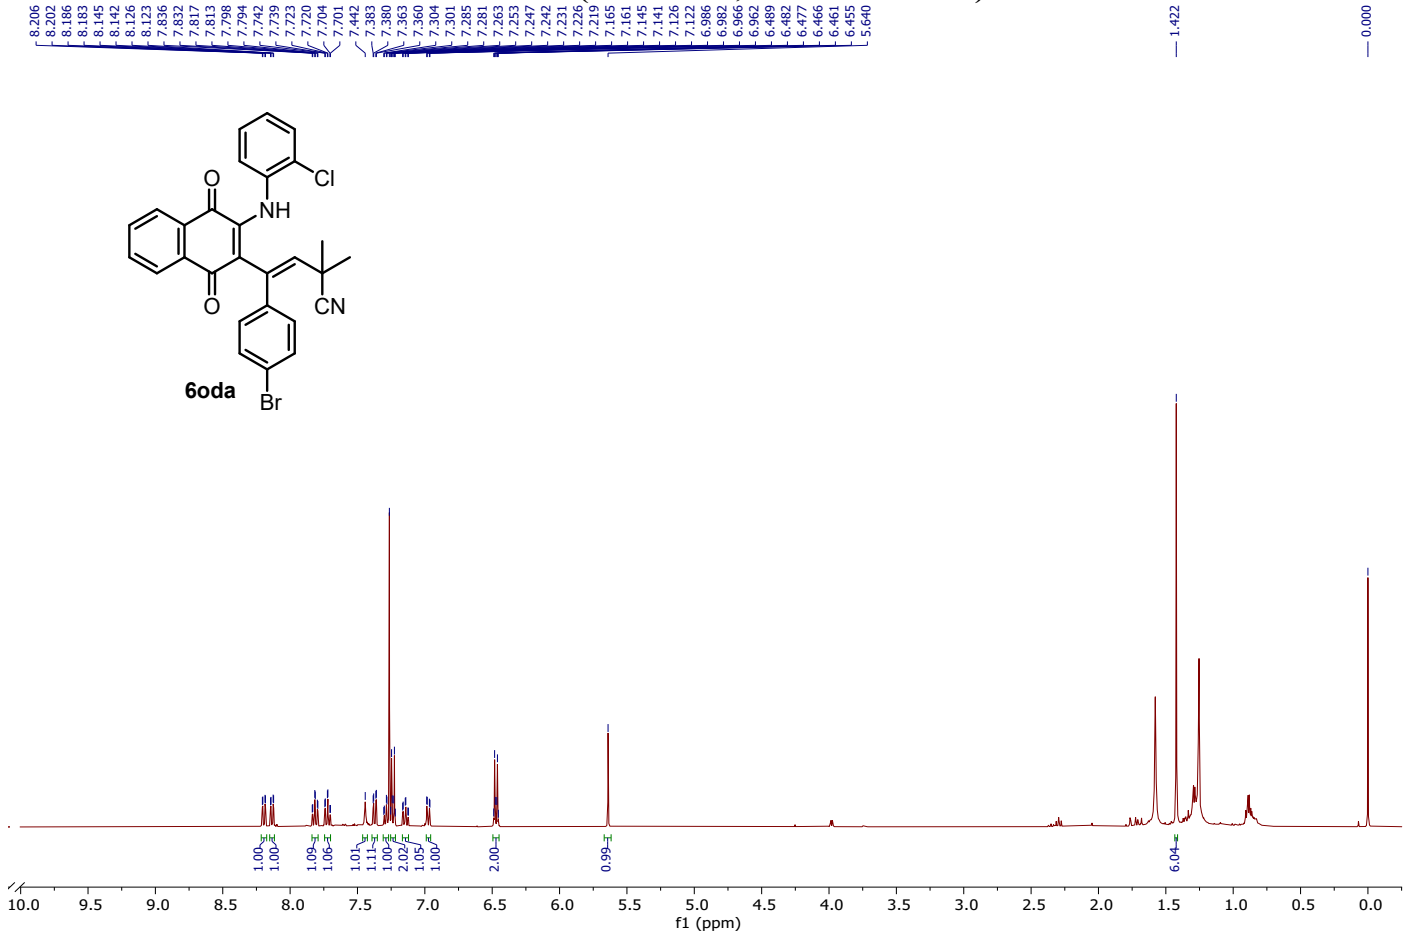

# <sup>13</sup>C-NMR (100 MHz, Chloroform-*d*)

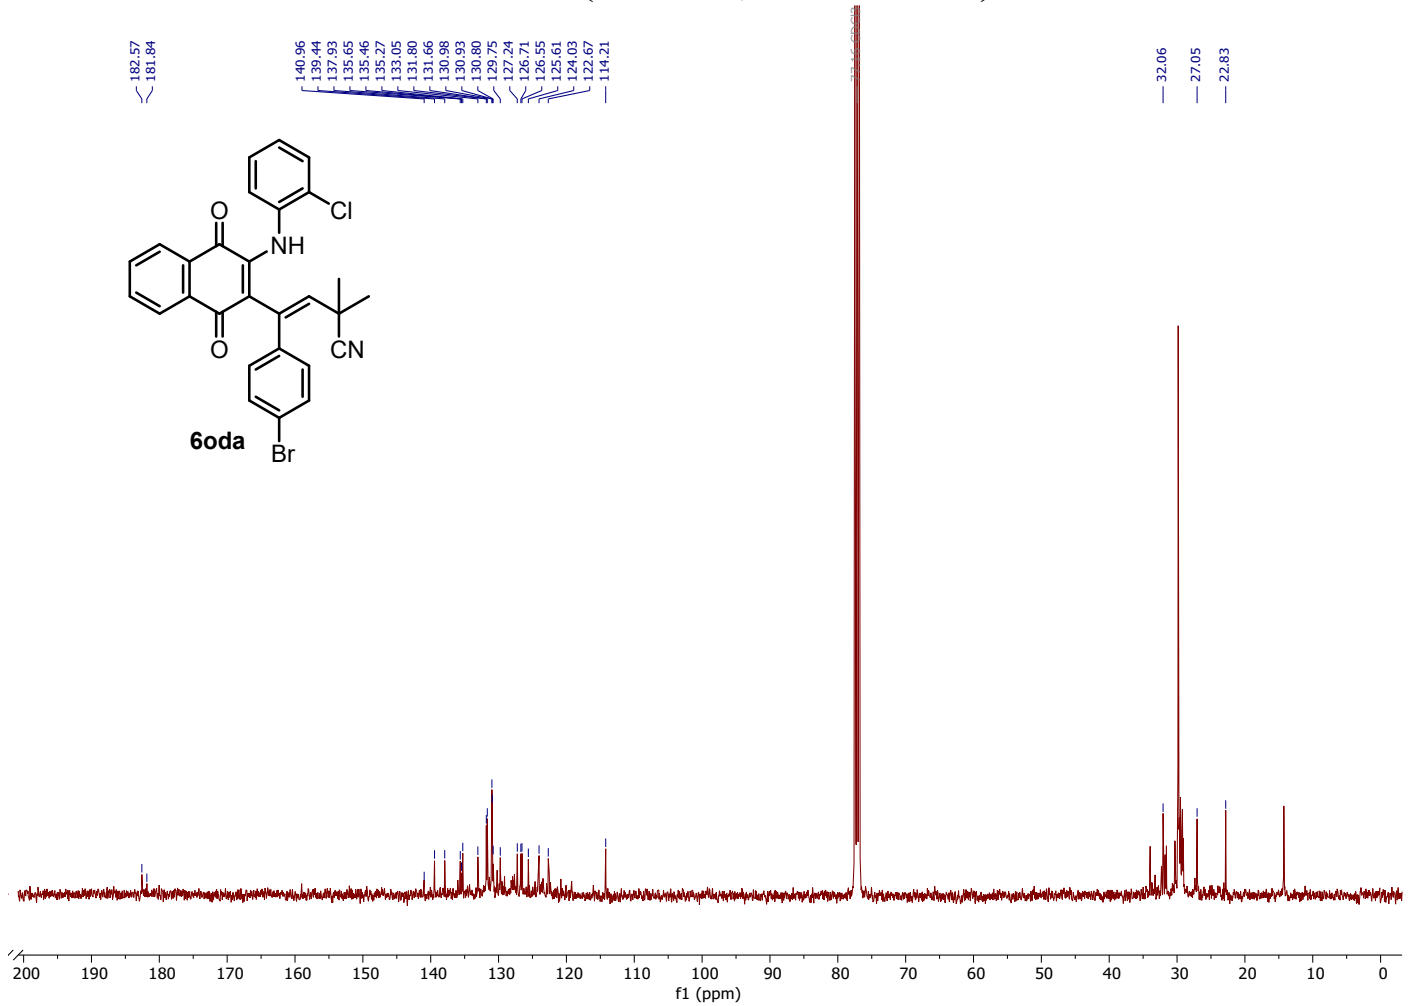

# <sup>1</sup>H-NMR (500 MHz, Chloroform-*d*)

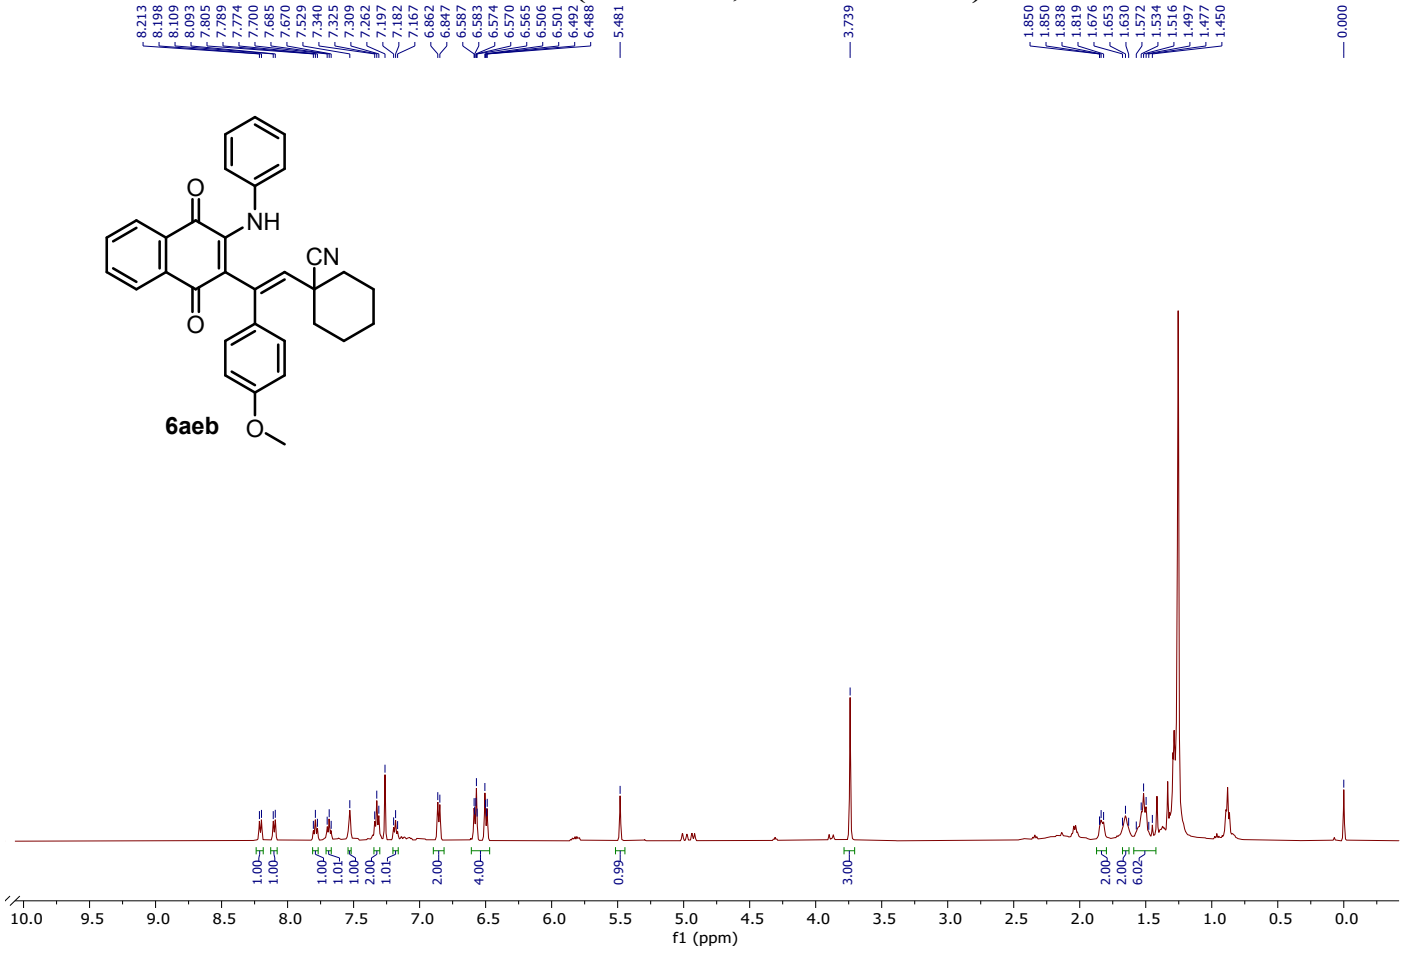

# <sup>13</sup>C-NMR (100 MHz, Chloroform-*d*)

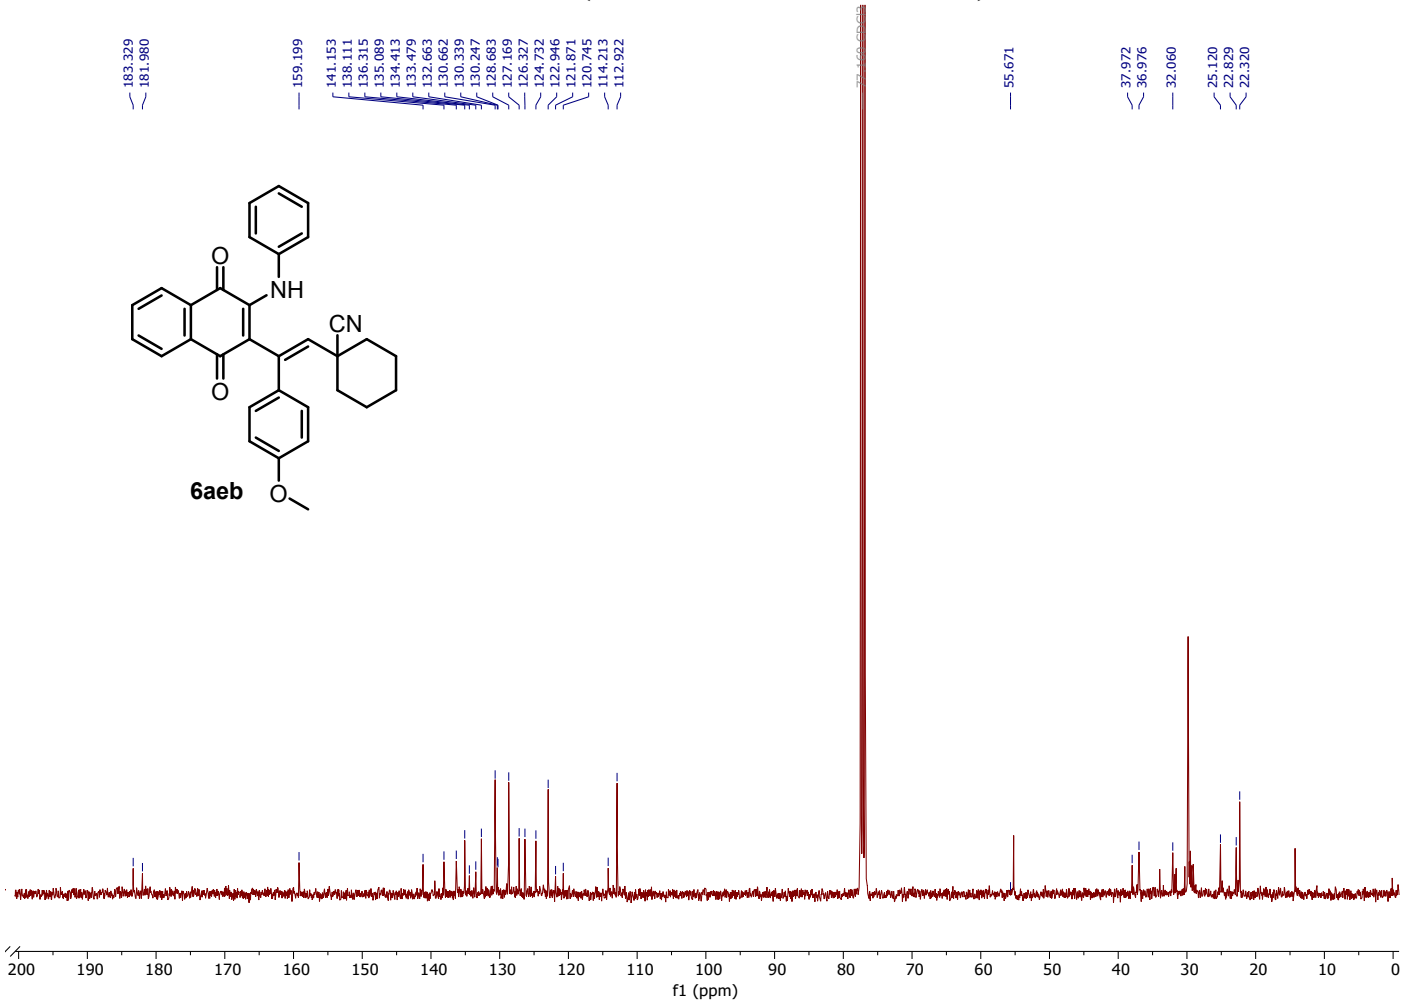



# <sup>1</sup>H-NMR (500 MHz, Chloroform-*d*)

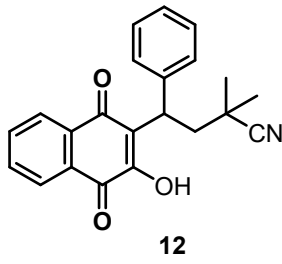

8.122, 8.107, 8.047, 8.031, 7.755, 7.740, 7.720, 7.667, 7.652, 7.637, 7.523, 7.508, 7.304, 7.289, 7.274, 7.261, 7.214, 7.199, 7.184, 4.794, 4.784, 4.775, 4.765, 3.024, 3.004, 2.995, 2.976, 2.254, 2.244, 2.225, 2.216, 1.405, 1.369, -0.000

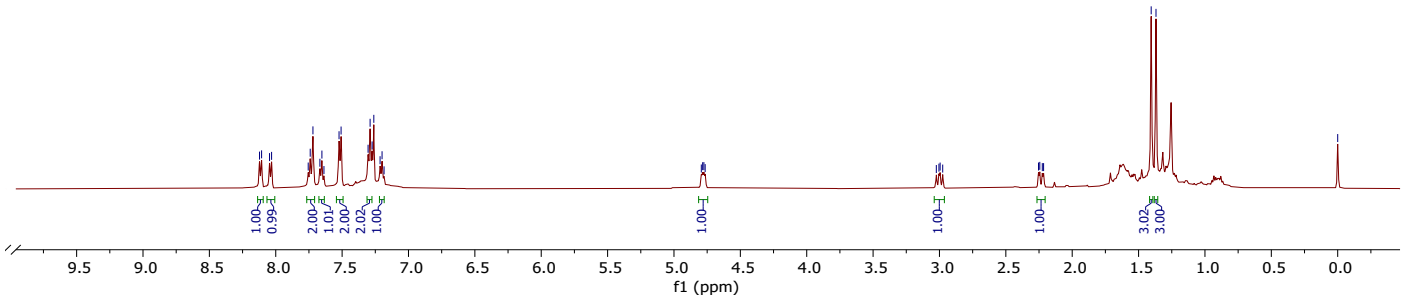

# <sup>13</sup>C-NMR (100 MHz, Chloroform-*d*)

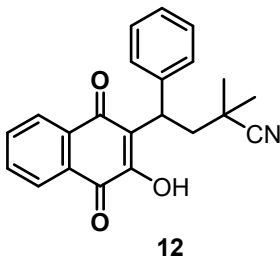

184.467, 181.580, 153.269, 142.382, 135.295, 133.132, 132.999, 129.218, 128.635, 128.519, 127.239, 126.966, 126.315, 124.971, 124.113, 77.160 CDCl3, 41.576, 37.588, 31.992, 28.714, 26.241

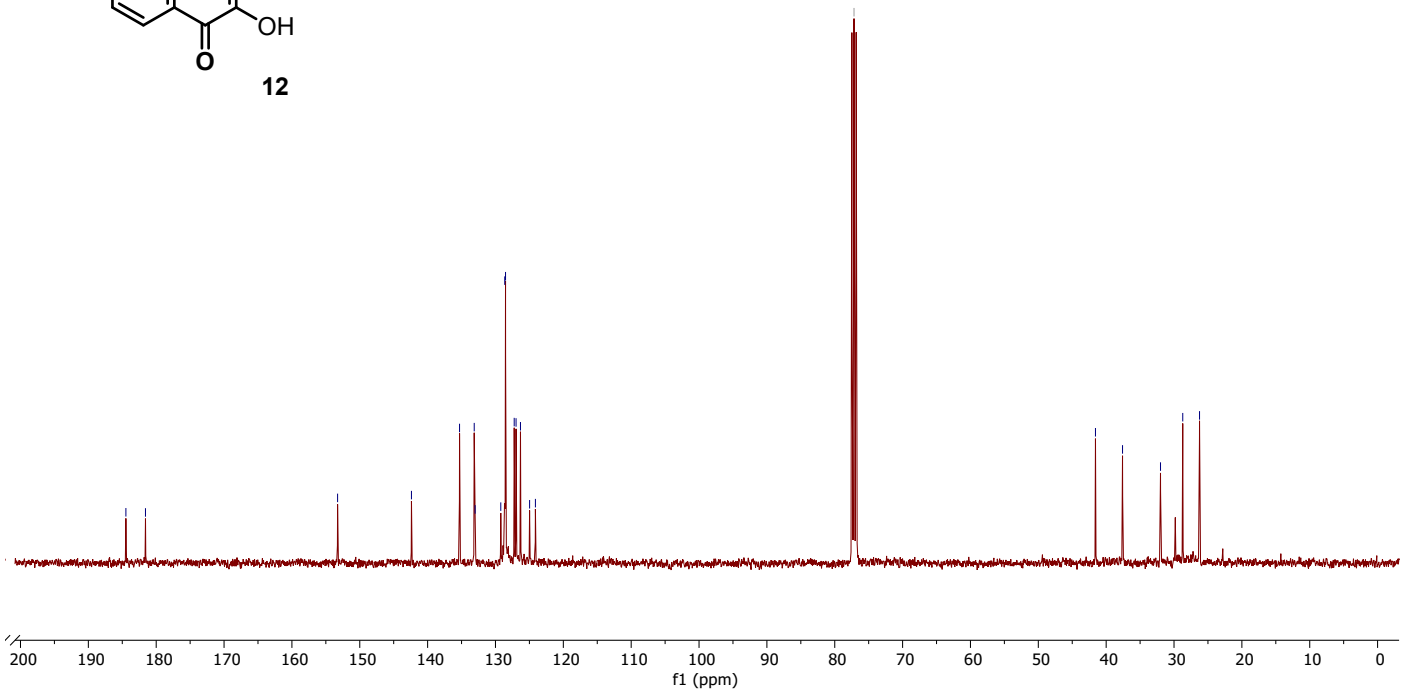

- **NOESY- 6oda:** No NOE observed between **H<sub>a</sub>** and **H<sub>c</sub>**, rather there was visible interaction only between **H<sub>a</sub>** and **H<sub>b</sub>**, **H<sub>b</sub>** and **H<sub>c</sub>**.

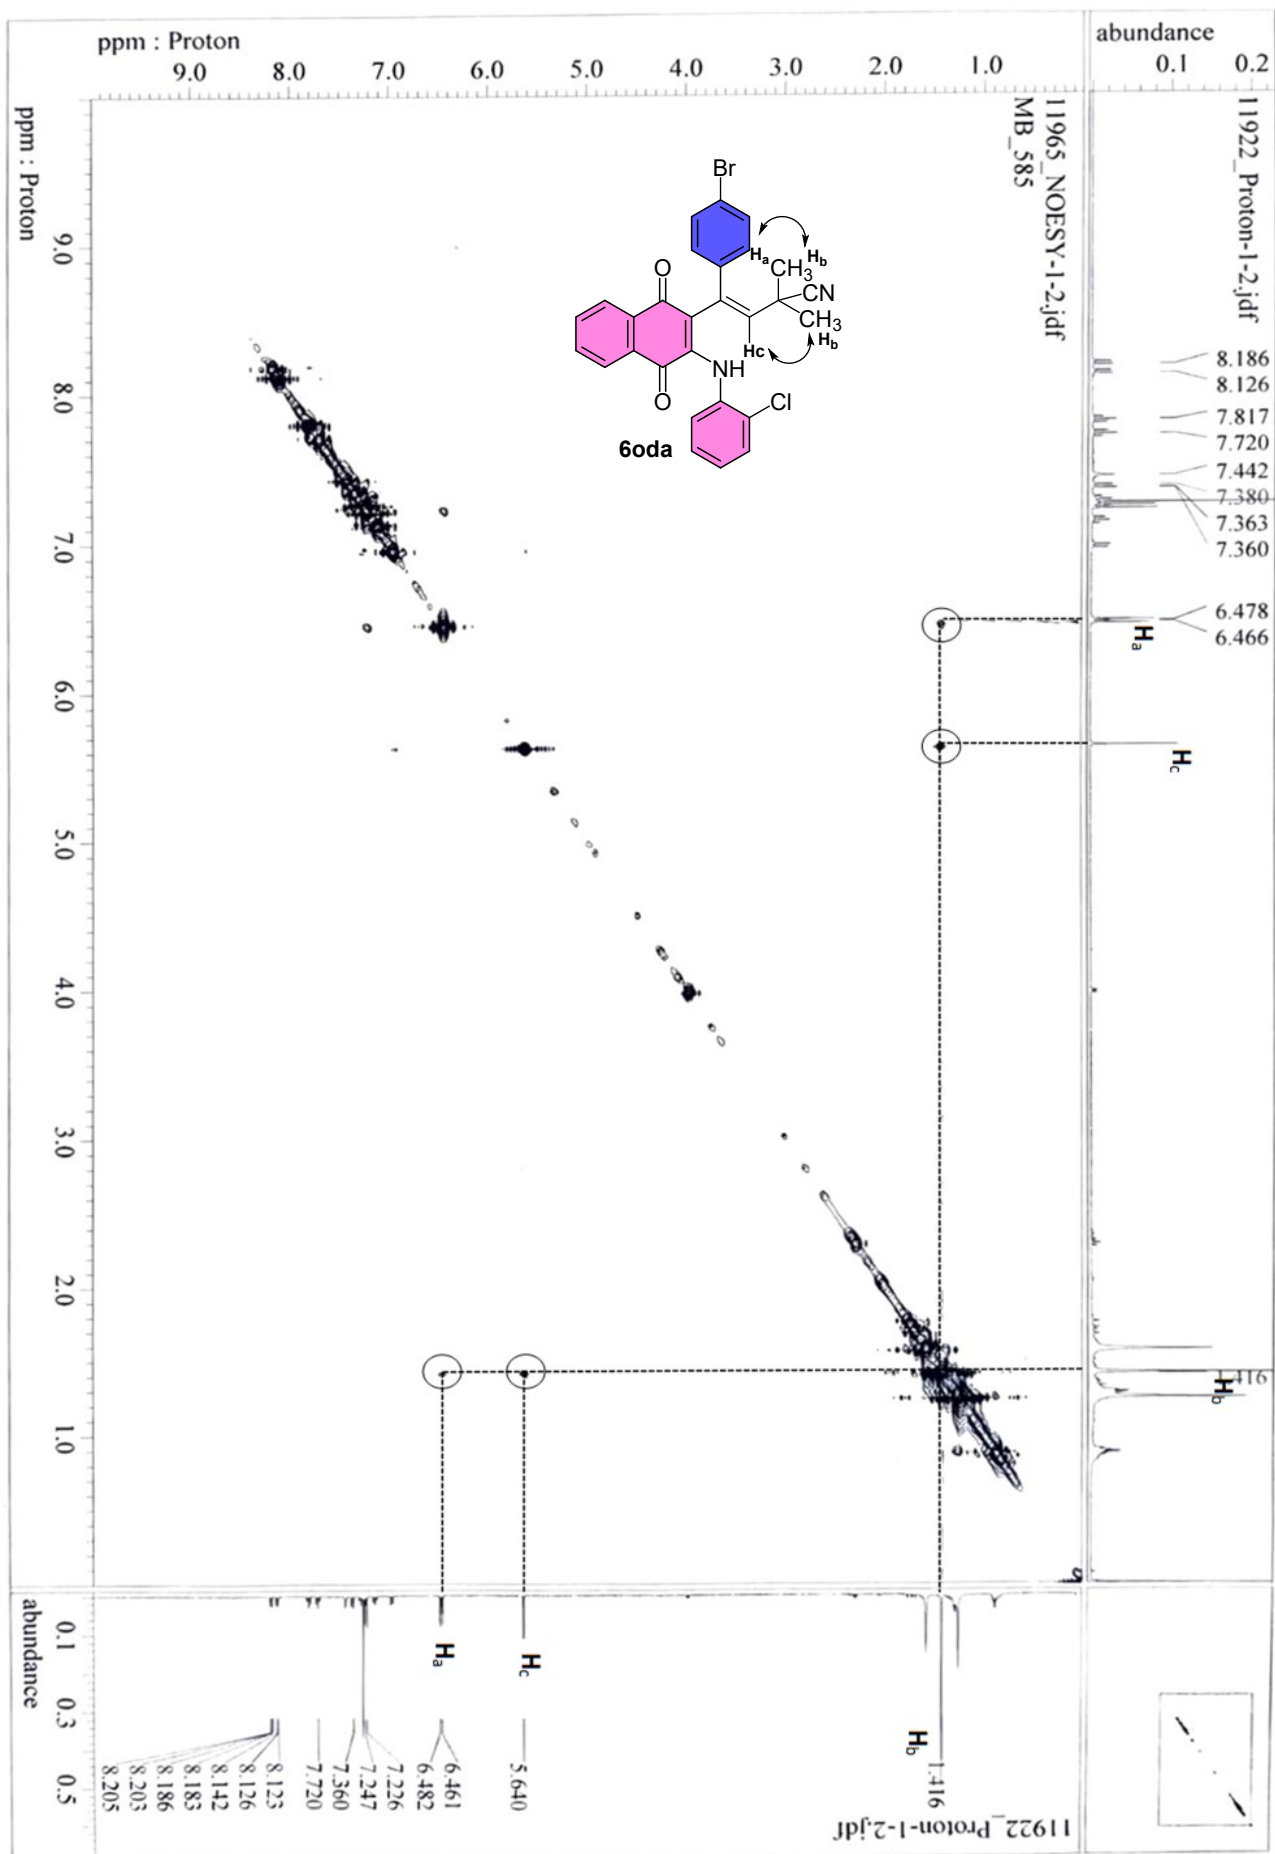

➤ HRMS data of the control experiment for the TEMPO-adduct (7)

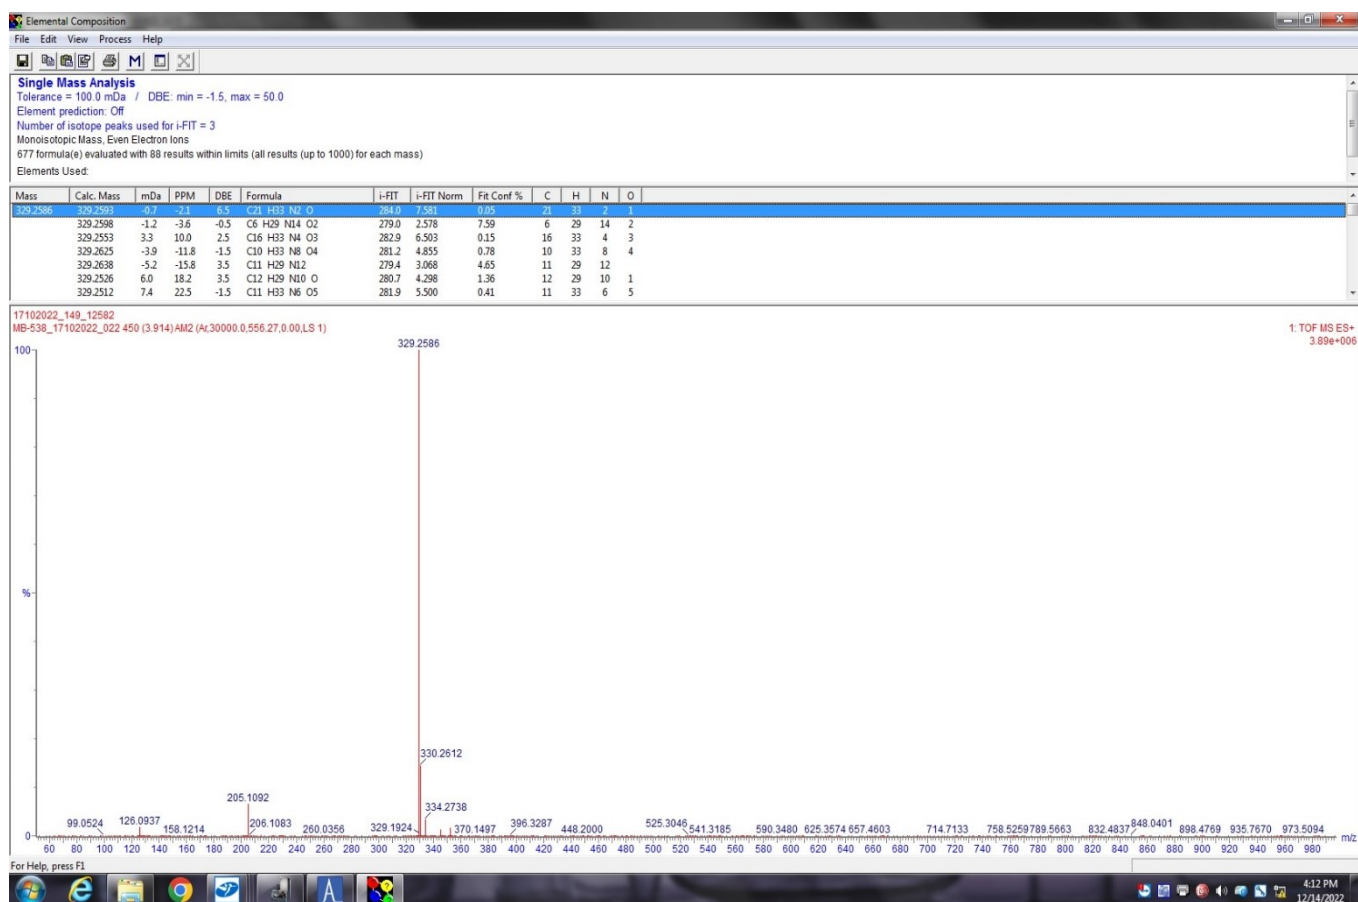

➤ HRMS data of the control experiment for the diphenylethylene-adduct (8)

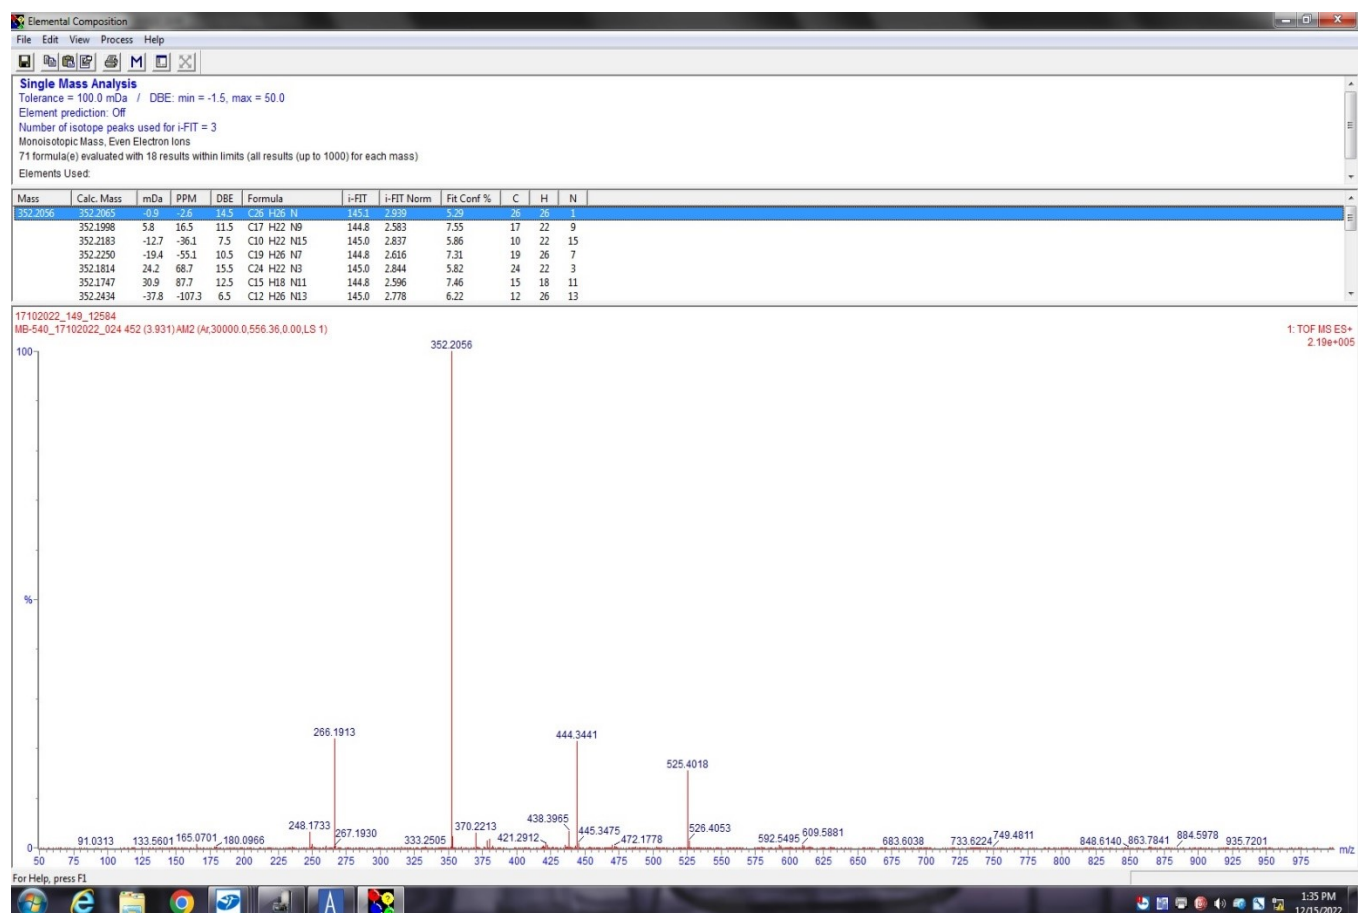

Supplement: d3ob01528a1.pdf [file d3ob01528a1.pdf]
